# Supplementary material for: Ruthenium-catalyzed acceptorless dehydrogenative coupling of amino alcohols and ynones to access 3-acylpyrroles
Source: Royal Society of Chemistry journal article supplement (doi:10.1039/d1cc07018e), 2022-01-01

# Supporting Information

## **Ruthenium-catalyzed acceptorless dehydrogenative coupling of amino alcohols and ynones to access 3-acylpyrroles**

Mingshi Pan, Xiabin Wang, Yixin Tong, Xiaodong Qiu, Xiaobao Zeng and Biao Xiong\*

School of Pharmacy, Nantong University, 19 Qixiu Road, Nantong, Jiangsu Province 226001, China.

### **Table of contents**

|                                                   |         |
|---------------------------------------------------|---------|
| General information                               | S2      |
| Preparation of ynones                             | S2-S7   |
| Screening of reaction conditions                  | S7-S8   |
| Typical procedure for the synthesis of <b>3aa</b> | S9      |
| Substrates employed for synthesis                 | S9      |
| References                                        | S10     |
| Time course diagram and spectrums of <b>3aaa</b>  | S11     |
| Mechanism investigation                           | S12-S13 |
| Details of the gram reaction                      | S14     |
| Analytical data of the obtained compounds         | S15-S30 |
| NMR spectra of obtained compounds                 | S31-S71 |

## General information

All the obtained products were characterized by melting points (m.p),  $^1\text{H-NMR}$ ,  $^{13}\text{C-NMR}$  and infrared spectra (IR). Melting points were measured on an Electrothermal SGW-X4 microscopy digital melting point apparatus and are uncorrected; IR spectra were recorded on a FTLA2000 spectrometer;  $^1\text{H-NMR}$  and  $^{13}\text{C-NMR}$  spectra were obtained on Bruker-400 and referenced to 7.19 ppm for chloroform solvent with TMS as internal standard (0 ppm). Chemical shifts were reported in parts per million (ppm,  $\delta$ ) downfield from tetramethylsilane. Proton coupling patterns are described as singlet (s), doublet (d), triplet (t), multiplet (m); TLC was performed using commercially prepared 100-400 mesh silica gel plates (GF254), and visualization was effected at 254 nm; Unless otherwise stated,, all the reagents were purchased from commercial sources (J&KChemic, TCI, Bidepharm, Aladdin, SCRC), used without further purification.

## Preparation of Ynones (2a-2t)

The preparation of alkynone **2** was similar to the literature procedures.<sup>[1, 2]</sup> **4** (5 mmol), **5** (5.5 mmol), triethylamine (5 mmol),  $\text{Pd}(\text{PPh}_3)_2\text{Cl}_2$  (2 mol % ), CuI (4 mol % ), and Anhydrous tetrahydrofuran (16 mL) were introduced in a flask (50 mL). Then, it was stirred at 30 °C under  $\text{N}_2$  for 18 hours. The reaction mixture was concentrated by removing the solvent under vacuum, and the residue was purified by column chromatography.

**Table S1.** Synthesis of Ynones (**2a-2t**)

$$\begin{array}{c}
 \text{R}^3-\text{C}(=\text{O})\text{Cl} \\
 \mathbf{10}
 \end{array}
 + 
 \begin{array}{c}
 \text{R}^4 \\
 \text{C}\equiv\text{C} \\
 \mathbf{11}
 \end{array}
 \xrightarrow[\text{THF, rt, 18h, N}_2]{\text{Pd}_2(\text{PPh}_3)_2\text{Cl}_2 (2 \text{ mol}\%), \text{Cul} (4 \text{ mol}\%), \text{Et}_3\text{N} (1 \text{ eq})}
 \begin{array}{c}
 \text{O} \\
 \parallel \\
 \text{R}^3-\text{C}-\text{C}\equiv\text{C}-\text{R}^4 \\
 \mathbf{2, \text{ isolated yield}}
 \end{array}$$

| Entry | R <sup>3</sup>                                  | R <sup>4</sup>                    | <b>2</b> <sup>[ref.]</sup> , Yield |
|-------|-------------------------------------------------|-----------------------------------|------------------------------------|
| 1     | 4-MeC <sub>6</sub> H <sub>4</sub>               | Ph                                | <b>2a</b> <sup>[2]</sup> , 90%     |
| 2     | 3-Me C <sub>6</sub> H <sub>4</sub>              | Ph                                | <b>2b</b> <sup>[3]</sup> , 92%     |
| 3     | 2-MeC <sub>6</sub> H <sub>4</sub>               | Ph                                | <b>2c</b> <sup>[2]</sup> , 91%     |
| 4     | C <sub>6</sub> H <sub>5</sub>                   | Ph                                | <b>2d</b> <sup>[1]</sup> , 86%     |
| 5     | 4-FC <sub>6</sub> H <sub>4</sub>                | Ph                                | <b>2e</b> <sup>[4]</sup> , 90%     |
| 6     | 4-ClC <sub>6</sub> H <sub>4</sub>               | Ph                                | <b>2f</b> <sup>[2]</sup> , 88%     |
| 7     | 4-BrC <sub>6</sub> H <sub>4</sub>               | Ph                                | <b>2g</b> <sup>[5]</sup> , 84%     |
| 8     | 4-CF <sub>3</sub> C <sub>6</sub> H <sub>4</sub> | Ph                                | <b>2h</b> <sup>[3]</sup> , 87%     |
| 9     | 4-CNC <sub>6</sub> H <sub>4</sub>               | Ph                                | <b>2i</b> <sup>[2]</sup> , 91%     |
| 10    | 4-OMeC <sub>6</sub> H <sub>4</sub>              | Ph                                | <b>2j</b> <sup>[2]</sup> , 84%     |
| 11    | 3,4-OMeC <sub>6</sub> H <sub>3</sub>            | Ph                                | <b>2k</b> <sup>[2]</sup> , 85%     |
| 12    | 4-OMeC <sub>6</sub> H <sub>4</sub>              | 4-MeC <sub>6</sub> H <sub>4</sub> | <b>2l</b> <sup>[3]</sup> , 87%     |
| 13    | 4-OMeC <sub>6</sub> H <sub>4</sub>              | 4-CNC <sub>6</sub> H <sub>4</sub> | <b>2m</b> <sup>[3]</sup> , 86%     |
| 14    | 4-CF <sub>3</sub> C <sub>6</sub> H <sub>4</sub> | 4-MeC <sub>6</sub> H <sub>4</sub> | <b>2n</b> <sup>[3]</sup> , 90%     |
| 15    | 4-CNC <sub>6</sub> H <sub>4</sub>               | 4-CNC <sub>6</sub> H <sub>4</sub> | <b>2o</b> <sup>[3]</sup> , 83%     |
| 16    |                                                 | Ph                                | <b>2p</b> <sup>[2]</sup> , 79%     |
| 17    |                                                 | Ph                                | <b>2q</b> <sup>[3]</sup> , 75%     |
| 18    |                                                 | Ph                                | <b>2r</b> <sup>[3]</sup> , 81%     |
| 19    | <i>t</i> -Bu                                    | Ph                                | <b>2s</b> <sup>[2]</sup> , 89%     |
| 20    | <i>n</i> -propyl                                | Ph                                | <b>2t</b> <sup>[3]</sup> , 76%     |

**Table S2. Preparation of Yrones (2u and 2v)**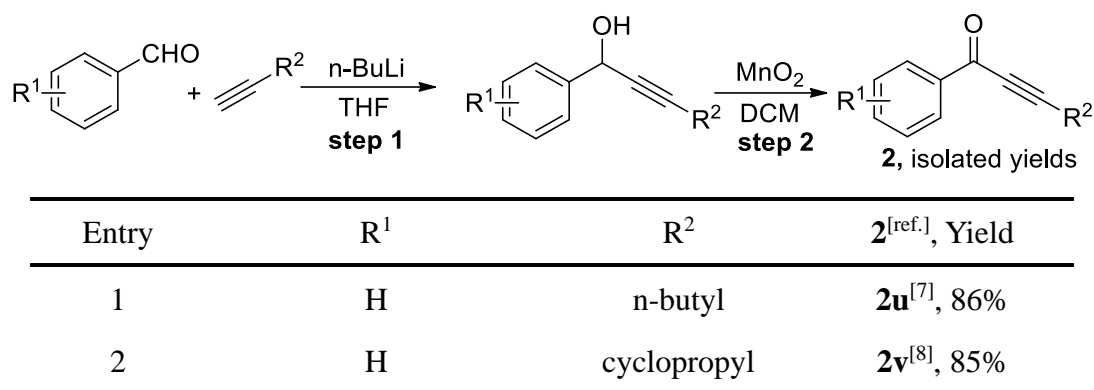

**Step 1**<sup>[6]</sup>: To a solution of alkyne (5.5 mmol) in THF (20 mL) at -40 °C was added n-BuLi (1.6 M in hexane, 5.5 mmol) dropwise. After stirring for 30 min, aldehyde (5.0 mmol) was added and the solution was warmed to RT. After the consumption of aldehyde, the reaction was quenched with saturated solution of NH<sub>4</sub>Cl and the mixture was extracted with ethyl acetate (30 mL×3). Then, the organic phase was dried by Na<sub>2</sub>SO<sub>4</sub>, filtered and concentrated under reduced pressure to afford the crude propargylic alcohol, which could be used directly in the next step without further purification.

**Step 2**<sup>[7]</sup>: The obtained crude propargylic alcohol was added to a suspension of MnO<sub>2</sub> (3.6 g, 40.0 mmol) in dichloromethane (35 mL) at 0 °C, and the mixture was stirred for 1 hour at 0 °C. After filtered through celite, the solvent was removed under vacuum. The residue was purified by silica column chromatography (EA: PE = 1: 50) to afford the alkyone.

### Analytical data of synthesized yrones

#### 1-(4-chlorophenyl)-3-phenylprop-2-yn-1-one (2f)

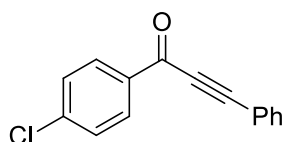

Yellow solid (1.06 g, 88% yield), m.p: 101-102 °C; <sup>1</sup>H NMR (400 MHz, CDCl<sub>3</sub>): δ 8.20-8.13 (m, 2H), 7.73-7.66 (m, 2H), 7.52-7.41 (m, 5H). <sup>13</sup>C NMR (101 MHz, CDCl<sub>3</sub>): δ 176.70, 140.75, 135.32, 133.14, 131.02, 130.90, 129.04, 128.77, 119.91,

93.66, 86.60. MS (EI, m/z): 240 [M]<sup>+</sup>.

**1-(4-bromophenyl)-3-phenylprop-2-yn-1-one (2g)**

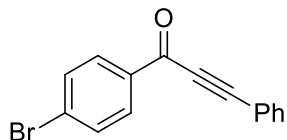

Yellow solid (1.19 g, 84% yield), m.p: 108-110 °C; <sup>1</sup>H NMR (400 MHz, CDCl<sub>3</sub>): δ 8.11-8.06 (m, 2H), 7.71-7.50 (m, 4H), 7.53-7.48 (m, 1H), 7.47-7.41 (m, 2H). <sup>13</sup>C NMR (101 MHz, CDCl<sub>3</sub>): δ 176.90, 135.72, 133.15, 132.03, 131.03, 130.97, 129.60, 128.77, 119.90, 93.71, 86.58. MS (EI, m/z): 284 [M]<sup>+</sup>.

**4-(3-phenylpropioloyl)benzonitrile (2i)**

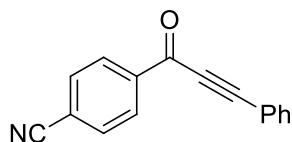

Yellow solid (1.05 g, 91% yield), m.p: 139-140 °C; <sup>1</sup>H NMR (400 MHz, CDCl<sub>3</sub>): δ 8.35-8.29 (m, 2H), 7.86-7.81 (m, 2H), 7.73-7.69 (m, 2H), 7.56-7.51 (m, 1H), 7.48-7.43 (m, 2H). <sup>13</sup>C NMR (101 MHz, CDCl<sub>3</sub>): δ 176.24, 139.67, 133.28, 132.53, 131.41, 129.84, 128.87, 119.48, 117.91, 117.19, 95.17, 86.44. MS (EI, m/z): 231 [M]<sup>+</sup>.

**1-(4-methoxyphenyl)-3-(p-tolyl)prop-2-yn-1-one (2l)**

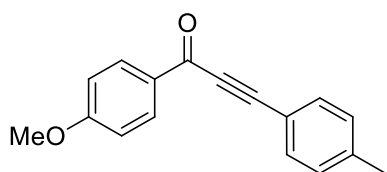

Brown solid (1.09 g, 87% yield), m.p: 78-79 °C; <sup>1</sup>H NMR (400 MHz, CDCl<sub>3</sub>): δ 8.19 (d, *J* = 8.8 Hz, 2H), 7.57 (d, *J* = 8.4 Hz, 2H), 7.22 (d, *J* = 8.0 Hz, 2H), 6.98 (d, *J* = 8.8 Hz, 2H), 3.90 (s, 3H), 2.40 (s, 3H). <sup>13</sup>C NMR (101 MHz, CDCl<sub>3</sub>): δ 176.78, 164.42, 141.32, 133.02, 131.97, 130.43, 129.47, 117.26, 113.87, 93.00, 86.79, 55.62, 21.78. MS (EI, m/z): 250 [M]<sup>+</sup>.

### 3-(p-tolyl)-1-(4-(trifluoromethyl)phenyl)prop-2-yn-1-one (2n)

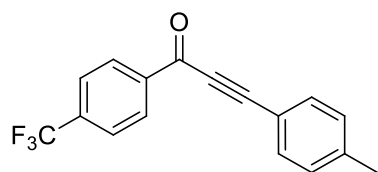

Yellow solid (1.30 g, 90% yield), m.p: 95-96 °C;  $^1\text{H}$  NMR (400 MHz,  $\text{CDCl}_3$ ):  $\delta$  8.33 (d,  $J = 8.4$  Hz, 2H), 7.79 (d,  $J = 8.0$  Hz, 2H), 7.60 (d,  $J = 8.0$  Hz, 2H), 7.25 (d,  $J = 8.0$  Hz, 2H), 2.42 (s, 3H).  $^{13}\text{C}$  NMR (101 MHz,  $\text{CDCl}_3$ ):  $\delta$  176.78, 142.11, 139.50, 135.10 (q,  $J_{\text{C-F}} = 32.3$  Hz), 133.30, 129.80, 129.63, 125.70 (q,  $J_{\text{C-F}} = 4.1$  Hz), 123.58 (d,  $J_{\text{C-F}} = 274.7$  Hz), 116.56, 95.28, 86.57, 21.85. MS (EI, m/z): 288 [M] $^+$ .

### 1-(furan-2-yl)-3-phenylprop-2-yn-1-one (2p)

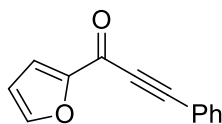

Brown solid (0.77 g, 79% yield), m.p: 50-51 °C;  $^1\text{H}$  NMR (400 MHz,  $\text{CDCl}_3$ ):  $\delta$  7.73-7.69 (m, 1H), 7.68-7.64 (m, 2H), 7.52-7.46 (m, 1H), 7.45-7.39 (m, 3H), 6.61 (dd,  $J = 3.6$  Hz, 1.6 Hz, 1H).  $^{13}\text{C}$  NMR (101 MHz,  $\text{CDCl}_3$ ):  $\delta$  164.80, 153.24, 148.08, 133.08, 130.91, 128.71, 120.97, 119.90, 112.69, 91.92, 86.24. MS (EI, m/z): 196 [M] $^+$ .

### 1-(naphthalen-1-yl)-3-phenylprop-2-yn-1-one (2r)

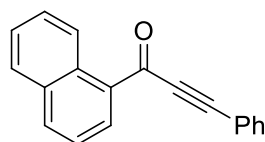

Yellow solid (1.04 g, 81% yield), m.p: 94-95 °C;  $^1\text{H}$  NMR (400 MHz,  $\text{CDCl}_3$ ):  $\delta$  9.24 (d,  $J = 8.4$  Hz, 1H), 8.65 (dd,  $J = 7.2$  Hz, 1.6 Hz, 1H), 8.10 (d,  $J = 8.0$  Hz, 1H), 7.92 (d,  $J = 8.4$  Hz, 1H), 7.72-7.67 (m, 3H), 7.64-7.56 (m, 2H), 7.50-7.40 (m, 3H).  $^{13}\text{C}$  NMR (101 MHz,  $\text{CDCl}_3$ ):  $\delta$  179.78, 135.14, 134.57, 133.91, 132.99, 130.78, 130.65, 129.00, 128.70, 128.61, 126.81, 126.04, 124.51, 120.39, 91.73, 88.52. MS (EI, m/z): 256 [M] $^+$ .

### 4,4-dimethyl-1-phenylpent-1-yn-3-one (2s)

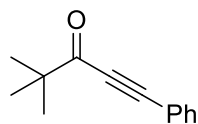

Yellow oil (0.83 g, 89% yield);  $^1\text{H}$  NMR (400 MHz,  $\text{CDCl}_3$ ):  $\delta$  7.60-7.56 (m, 2H), 7.48-7.43 (m, 1H), 7.41-7.36 (m, 2H), 1.28 (m, 9H).  $^{13}\text{C}$  NMR (101 MHz,  $\text{CDCl}_3$ ):  $\delta$  194.31, 132.98, 130.58, 128.63, 120.27, 92.24, 86.01, 44.91, 26.16. MS (EI, m/z): 186 [M] $^+$ .

### 1-phenylhept-2-yn-1-one (2u)

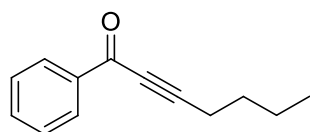

Colorless oil (0.80 g, 86% yield);  $^1\text{H}$  NMR (400 MHz,  $\text{CDCl}_3$ ):  $\delta$  8.17-7.17 (m, 2H), 7.55-7.48 (m, 1H), 7.46-7.33 (m, 2H), 2.43 (t,  $J = 7.2$  Hz, 2H), 1.59 (p,  $J = 7.2$  Hz, 2H), 1.43 (h,  $J = 7.2$  Hz, 2H), 0.88 (t,  $J = 7.2$  Hz, 3H).  $^{13}\text{C}$  NMR (101 MHz,  $\text{CDCl}_3$ ):  $\delta$  178.31, 136.91, 133.91, 129.57, 128.52, 96.92, 79.67, 29.85, 22.11, 18.94, 13.57. MS (EI, m/z): 186 [M] $^+$ .

### 3-cyclopropyl-1-phenylprop-2-yn-1-one (2v)

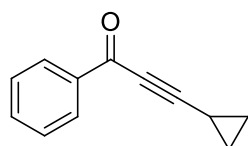

Colorless oil (0.72 g, 85% yield);  $^1\text{H}$  NMR (400 MHz,  $\text{CDCl}_3$ ):  $\delta$  8.02 (d,  $J = 8.0$  Hz, 2H), 7.53-7.46 (m, 1H), 7.38 (t,  $J = 7.6$  Hz, 2H), 1.50-1.39 (m, 1H), 1.01-1.89 (m, 4H).  $^{13}\text{C}$  NMR (101 MHz,  $\text{CDCl}_3$ ):  $\delta$  177.92, 136.87, 133.79, 129.41, 128.44, 101.14, 75.51, 9.92, . MS (EI, m/z): 170 [M] $^+$ .

**Table S3. Screening of reaction conditions<sup>a</sup>**

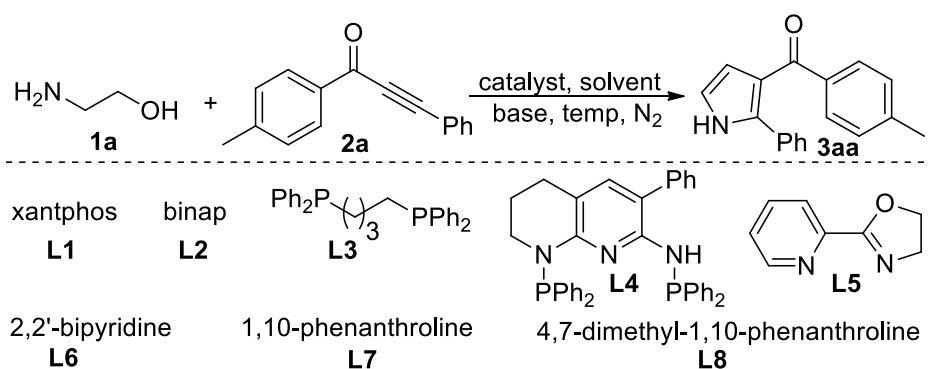

| Entry | Catalyst                                                             | Ligand    | Solvent                | Base                            | Yield(%) <sup>b</sup>     |
|-------|----------------------------------------------------------------------|-----------|------------------------|---------------------------------|---------------------------|
| 1     | Mn <sub>2</sub> (CO) <sub>10</sub>                                   | <b>L1</b> | <i>t</i> -amyl alcohol | Cs <sub>2</sub> CO <sub>3</sub> | trace                     |
| 2     | Co <sub>2</sub> (CO) <sub>8</sub>                                    | <b>L1</b> | <i>t</i> -amyl alcohol | Cs <sub>2</sub> CO <sub>3</sub> | trace                     |
| 3     | Ru <sub>3</sub> (CO) <sub>12</sub>                                   | <b>L1</b> | <i>t</i> -amyl alcohol | Cs <sub>2</sub> CO <sub>3</sub> | 59                        |
| 4     | RuCl <sub>2</sub> (PPh <sub>3</sub> ) <sub>3</sub>                   | <b>L1</b> | <i>t</i> -amyl alcohol | Cs <sub>2</sub> CO <sub>3</sub> | 42                        |
| 5     | RuCl <sub>2</sub> (CO) <sub>2</sub> (PPh <sub>3</sub> ) <sub>2</sub> | <b>L1</b> | <i>t</i> -amyl alcohol | Cs <sub>2</sub> CO <sub>3</sub> | 48                        |
| 6     | [Ru( <i>p</i> -cymene)Cl <sub>2</sub> ] <sub>2</sub>                 | <b>L1</b> | <i>t</i> -amyl alcohol | Cs <sub>2</sub> CO <sub>3</sub> | 31                        |
| 7     |                                                                      | <b>L1</b> | <i>t</i> -amyl alcohol | Cs <sub>2</sub> CO <sub>3</sub> | 0                         |
| 8     | Ru <sub>3</sub> (CO) <sub>12</sub>                                   | <b>L2</b> | <i>t</i> -amyl alcohol | Cs <sub>2</sub> CO <sub>3</sub> | 52                        |
| 9     | Ru <sub>3</sub> (CO) <sub>12</sub>                                   | <b>L3</b> | <i>t</i> -amyl alcohol | Cs <sub>2</sub> CO <sub>3</sub> | 21                        |
| 10    | Ru <sub>3</sub> (CO) <sub>12</sub>                                   | <b>L4</b> | <i>t</i> -amyl alcohol | Cs <sub>2</sub> CO <sub>3</sub> | 37                        |
| 11    | Ru <sub>3</sub> (CO) <sub>12</sub>                                   | <b>L5</b> | <i>t</i> -amyl alcohol | Cs <sub>2</sub> CO <sub>3</sub> | 54                        |
| 12    | Ru <sub>3</sub> (CO) <sub>12</sub>                                   | <b>L6</b> | <i>t</i> -amyl alcohol | Cs <sub>2</sub> CO <sub>3</sub> | 58                        |
| 13    | Ru <sub>3</sub> (CO) <sub>12</sub>                                   | <b>L7</b> | <i>t</i> -amyl alcohol | Cs <sub>2</sub> CO <sub>3</sub> | 72                        |
| 14    | Ru <sub>3</sub> (CO) <sub>12</sub>                                   | <b>L8</b> | <i>t</i> -amyl alcohol | Cs <sub>2</sub> CO <sub>3</sub> | 78                        |
| 15    | Ru <sub>3</sub> (CO) <sub>12</sub>                                   | <b>L8</b> | <i>t</i> -amyl alcohol | Base                            | (56, 39, 0) <sup>c</sup>  |
| 16    | Ru <sub>3</sub> (CO) <sub>12</sub>                                   | <b>L8</b> | <i>t</i> -amyl alcohol | Base                            | (43, 18, 0) <sup>d</sup>  |
| 17    | Ru <sub>3</sub> (CO) <sub>12</sub>                                   | <b>L8</b> | 1,4-Dioxane            | Cs <sub>2</sub> CO <sub>3</sub> | 72                        |
| 18    | Ru <sub>3</sub> (CO) <sub>12</sub>                                   | <b>L8</b> | Toluene                | Cs <sub>2</sub> CO <sub>3</sub> | 70                        |
| 19    | Ru <sub>3</sub> (CO) <sub>12</sub>                                   | <b>L8</b> | Chlorobenzene          | Cs <sub>2</sub> CO <sub>3</sub> | 70                        |
| 20    | Ru <sub>3</sub> (CO) <sub>12</sub>                                   | <b>L8</b> | DMF                    | Cs <sub>2</sub> CO <sub>3</sub> | 47                        |
| 21    | Ru <sub>3</sub> (CO) <sub>12</sub>                                   | <b>L8</b> | DMSO                   | Cs <sub>2</sub> CO <sub>3</sub> | 12                        |
| 22    | Ru <sub>3</sub> (CO) <sub>12</sub>                                   | <b>L8</b> | <i>t</i> -amyl alcohol | Cs <sub>2</sub> CO <sub>3</sub> | (23, 89, 89) <sup>e</sup> |

<sup>a</sup> Unless otherwise stated, the reaction was performed with **1a** (0.3 mmol), **2a** (0.3 mmol), catalyst (1 mol%), ligand (3 mol%), base (100 mmol%) in *t*-amyl alcohol (1.5 mL) at 130 °C for 16 h under N<sub>2</sub>. <sup>b</sup> GC yield. <sup>c</sup> Yields are with respect to use of K<sub>2</sub>CO<sub>3</sub>, CsOH and *t*-BuOK as the bases, respectively. <sup>d</sup> Yields are with respect to use of Na<sub>2</sub>CO<sub>3</sub>, NaOH and *t*-BuONa as the bases, respectively. <sup>e</sup> Yields are with respect to the temperature at 120 °C, 140 °C and 150 °C, respectively.



### Typical procedure for the synthesis of **3aa**

Under N<sub>2</sub> atmosphere, 2-aminoethanol hydrochloride **1a** (29 mg, 0.3 mmol), alkyne **2a** (66 mg, 0.3 mmol), 4,7-dimethyl-1,10-phenanthroline (1.9 mg, 3 mol %), Ru<sub>3</sub>CO<sub>12</sub> (2.0 mg, 1 mol %), Cs<sub>2</sub>CO<sub>3</sub> (97 mg, 100 mol %), and *t*-Amyl alcohol (1.5 mL) were introduced in a Schlenk tube (25 mL), successively. Then, the Schlenk tube was closed and the resulting mixture was stirred at 140 °C for 16 h. Then, the reaction mixture was concentrated by removing the solvent under vacuum, and the residue was purified by preparative TLC on silica, eluting with petroleum ether: ethyl acetate (10:1) to give (2-phenyl-1H-pyrrol-3-yl)(p-tolyl) methanone **3aa** as a canary yellow solid.

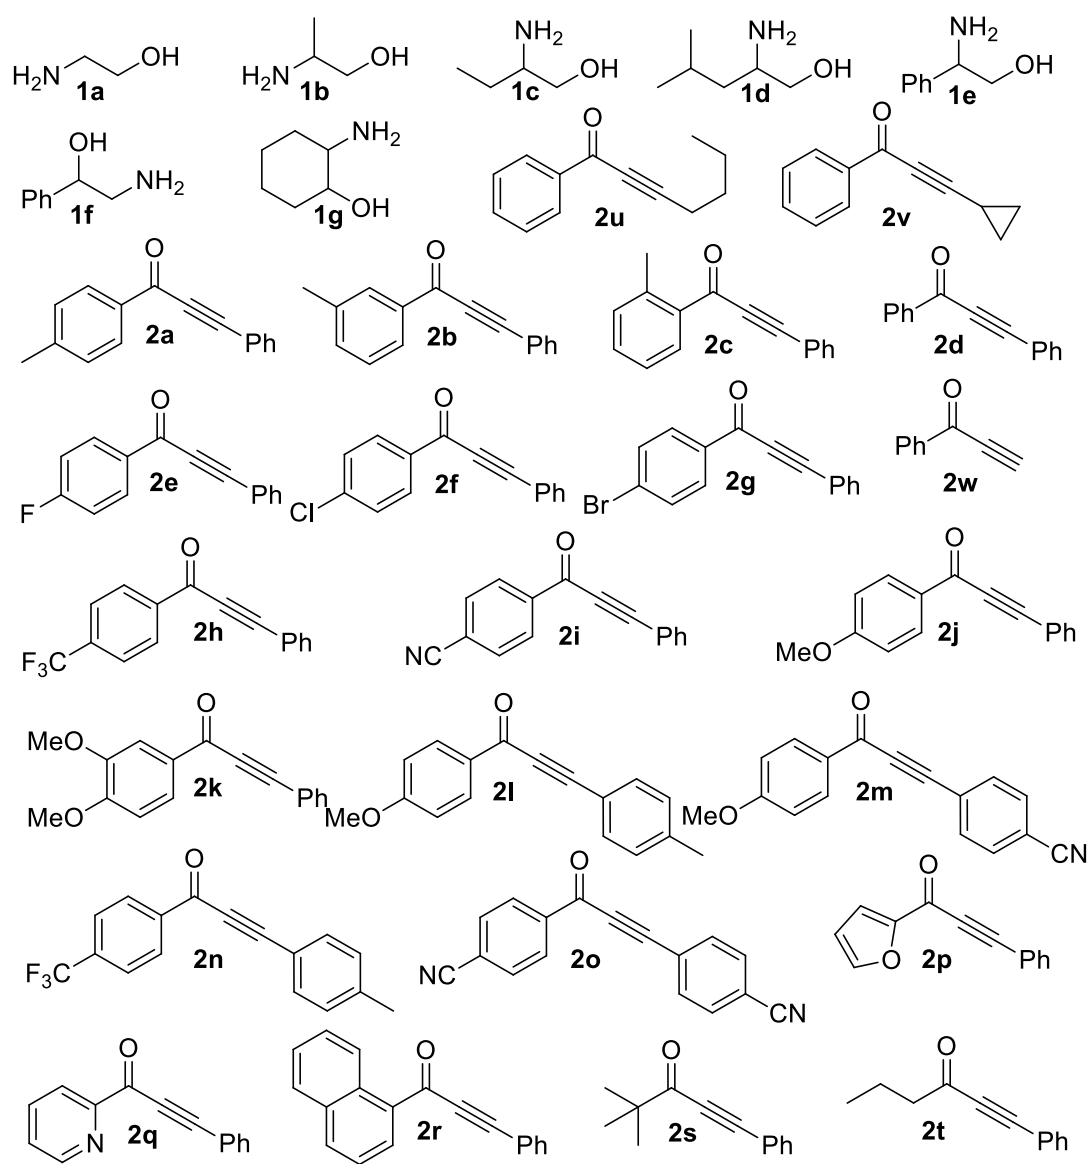

**Scheme S1.** Substrates employed for synthesizing pyrroles

## Reference

- [1] Y. Tohda, K. Sonogashira, N. Hagihara; *Synthesis* **1977**, 777-778.
- [2] D. A. Alonso, C. Najera, M. C. Pacheco; *J. Org. Chem.* **2004**, *69*, 1615-1619.
- [3] L. C. Zhang, Y. L. Chu, P. Z. Ma, S. J. Zhao, Q. Y. Li, B. Y. Chen, X. J. Hong, J. Sun; *Org. Biomol. Chem.* **2020**, *18*, 1073-1077.
- [4] X. F. Wu, H. Neumann, M. Beller; *Chem.-Eur. J.* **2010**, *16*, 12104-12107.
- [5] J. X. Wang, B. G. Wei, Y. L. Hu, Z. X. Liu, Y. Fu; *Syn. Comm.* **2001**, *31*, 3527-3532.
- [6] W. M. Yan, Y. F. Chen, J. L. Petersen, X. D. Shi; *Org. Lett.* **2010**, *12*, 3308-3311.
- [7] R. Shintani; T. Hayashi. *Org. Lett.* **2005**, *7*, 2071-2073.
- [8] D. Zhai, S. M. Ma; *Org. Chem. Front.* **2019**, *6*, 3101-3106.

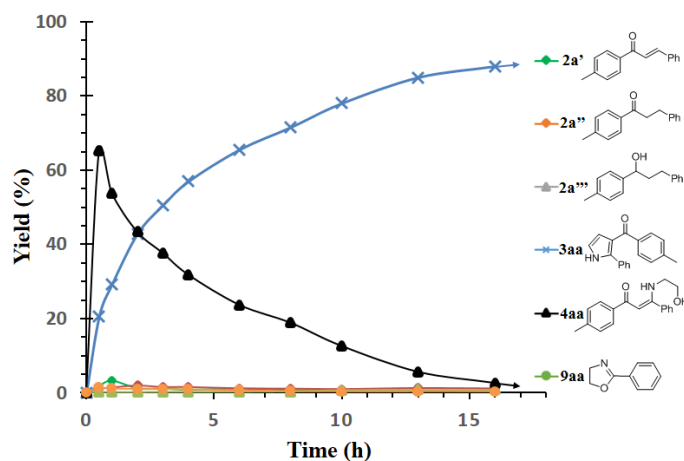

**Fig S1.** Representative time course of the reaction

A time-concentration profile of different components of the model reaction under the standard conditions is depicted in Figure S1. Initially, intermediate **4aa** was almost formed quantitatively in a short time and converted into target product **3aa** efficiently in the first 2 hours. Meanwhile, due to the auto transfer hydrogenation, a small amount of reduction product of **2a** were detected which had no increase over the whole reaction time, indicating the protocol has good selectivity on the catalytic acceptorless dehydrogenation coupling rather than auto transfer hydrogenation. Moreover, **4aa** could be completely transformed into the product **3aa** within 16 h. The above-results indicate that the compound **4aa** is a key intermediate.

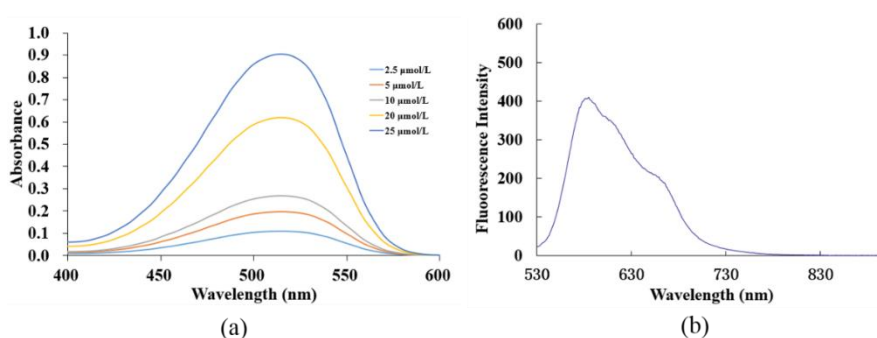

**Figure S2.** UV (a) and fluorescence emission spectrums (b) of **3aaa**

An obvious absorbance peak at 515 nm of this synthesized BODIPY (**3aaa**) was observed from UV-vis absorption spectra and the maximum emission wavelength was located at 585 nm under the excitation wavelength at 520 nm (5  $\mu$ M **3aaa** in DMSO).

## Mechanism investigation

### 1. GC-MS spectrums of control experiments

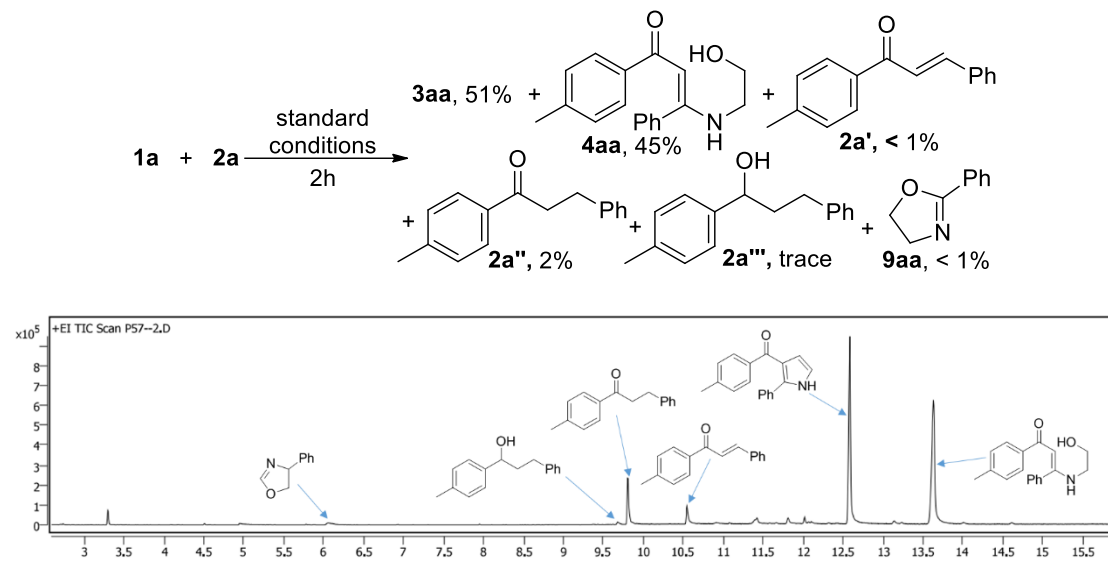

**Figure S3** GC-MS of the model reaction under standard conditions after 2 hours.

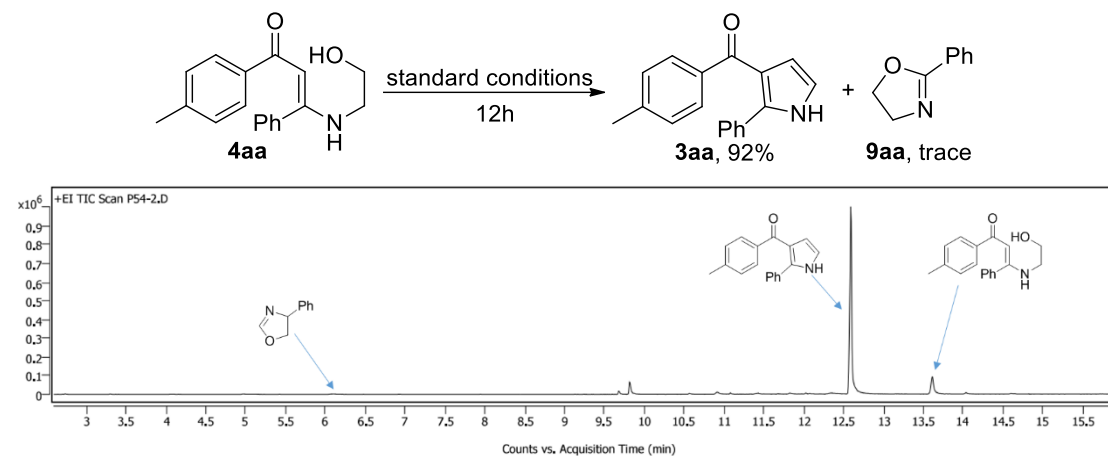

**Figure S4** GC-MS of the reaction from **4aa** after 12 hours.

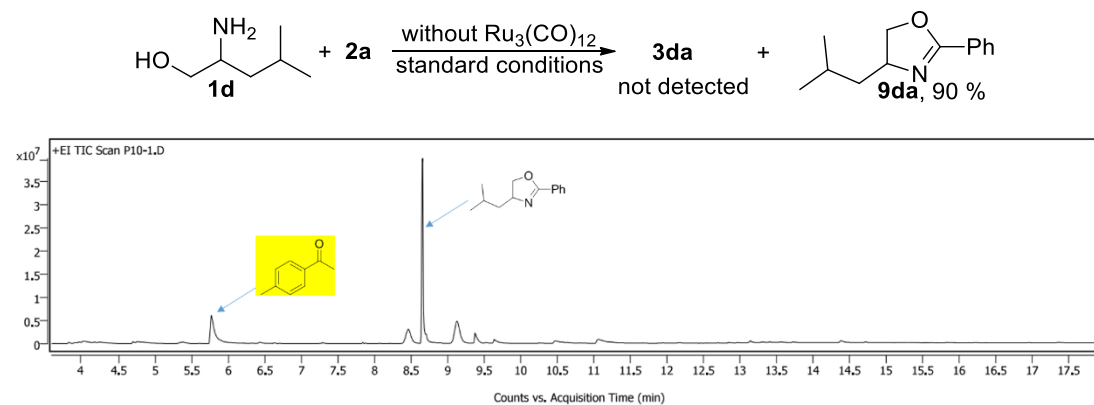

**Figure S5** GC-MS of the reaction from **1d** and **2a** without catalyst after 12 hours.

## 2. Detection of hydrogen gas

The model reaction of **1a** (0.3 mmol) and **2a** (0.3 mmol) was stirred at 140 °C under N<sub>2</sub> atmosphere for 12 h. After cooling to room temperature, the head gas was collected by a gas-tight syringe and analyzed by GC. (Instrument model: GC9790plus. The peak time has very slight deviation because of the manual injection mode.)

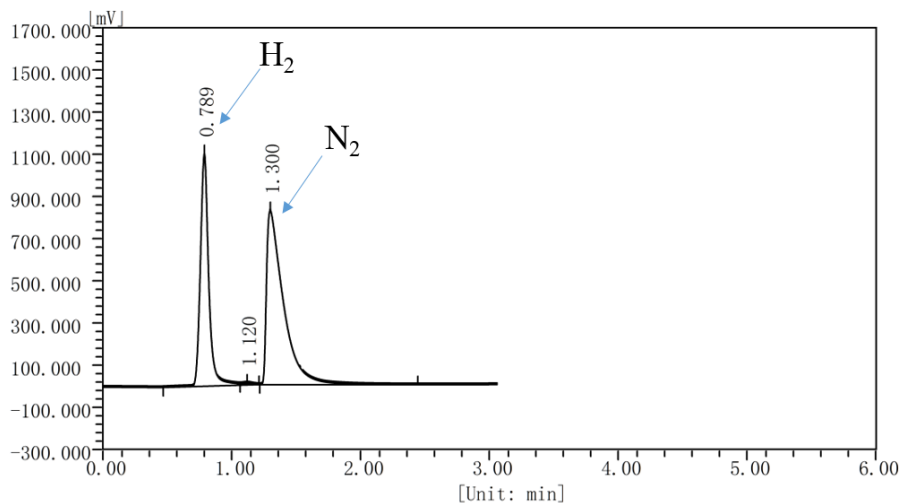

**Fig S6** GC of the standard mixture of N<sub>2</sub> and H<sub>2</sub> ( $V_{N_2} / V_{H_2} = 95 / 5$ )

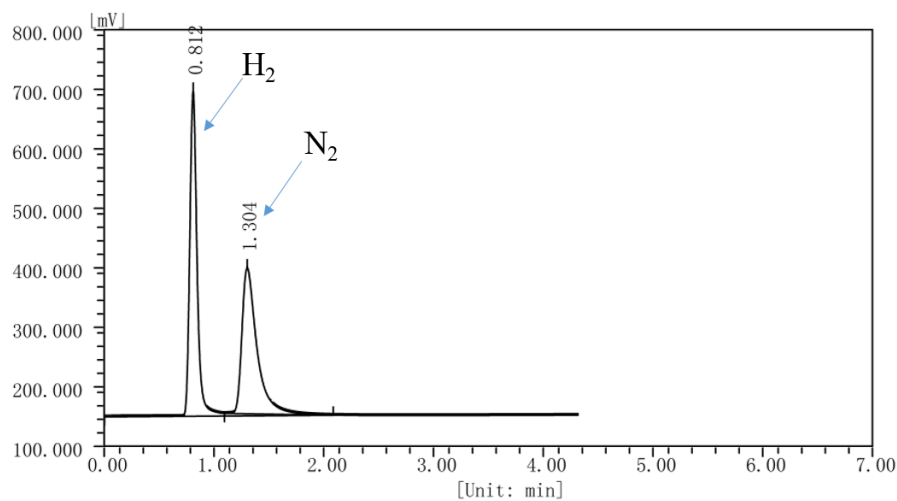

**Fig S7** GC of the head gas of model reaction

### Details of the gram reaction

Under N<sub>2</sub> atmosphere, 2-aminoethanol hydrochloride **1a** (0.61 g, 10.0 mmol), alkyne **2a** (2.20 g, 10.0 mmol), 4,7-dimethyl-1,10-phenanthroline (62.5 mg, 3 mol %), Ru<sub>3</sub>CO<sub>12</sub> (64.0 mg, 1 mol %), Cs<sub>2</sub>CO<sub>3</sub> (3.2 g, 100 mol %), and *t*-Amyl alcohol (20 mL) were introduced in a Schlenk tube (100 mL), successively. Then, the Schlenk tube was closed and the resulting mixture was stirred at 140 °C for 24 h. Then, the reaction mixture was concentrated by removing the solvent under vacuum, and the residue was purified by silica-gel column chromatography, eluting with petroleum ether: ethyl acetate (20:1) to give (2-phenyl-1H-pyrrol-3-yl)(*p*-tolyl) methanone **3aa** (2.11g, 81%).

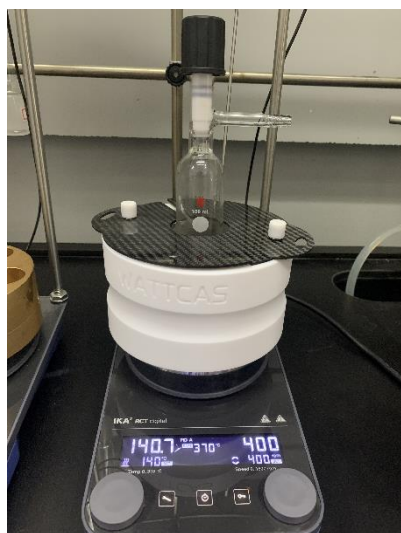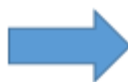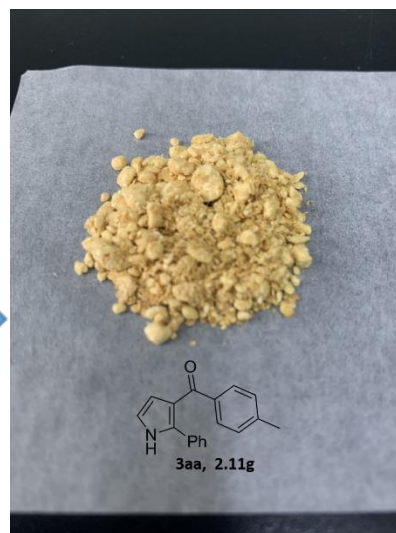

## Analytic data of the obtained compounds

### (1) (2-phenyl-1H-pyrrol-3-yl)(p-tolyl)methanone (3aa)

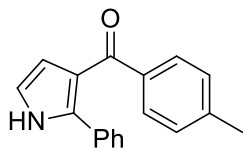

Yellow solid, 88% yield, m.p: 155-157 °C;  $^1\text{H}$  NMR (400 MHz,  $\text{CDCl}_3$ )  $\delta$  8.72 (s, 1H), 7.63 (d,  $J = 8.0$  Hz, 2H), 7.38-7.32 (m, 2H), 7.24-7.12 (m, 3H), 7.06 (d,  $J = 8.0$  Hz, 2H), 6.69 (m, 1H), 6.52-6.46 (m, 1H), 2.29 (s, 3H).  $^{13}\text{C}$  NMR (101 MHz,  $\text{CDCl}_3$ )  $\delta$  192.37, 142.25, 136.85, 136.77, 132.10, 129.91, 128.57, 128.37, 128.34, 127.86, 120.52, 117.61, 113.68, 21.57. IR (KBr): 3243, 1615, 1597, 1566, 1557, 1495, 1472, 1432, 1399, 1312, 1292, 1164, 1112, 1034, 883, 779, 760, 735, 696  $\text{cm}^{-1}$ . MS (EI, m/z): 261  $[\text{M}]^+$ . HRMS (ESI): Calcd. for  $\text{C}_{18}\text{H}_{15}\text{NO}$   $[\text{M}+\text{H}]^+$ : 262.1226; found: 262.1224.

### (2) (2-phenyl-1H-pyrrol-3-yl)(m-tolyl)methanone (3ab)

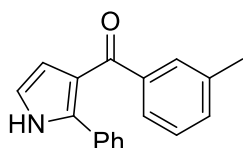

Yellow solid, 81% yield, m.p: 92-95 °C;  $^1\text{H}$  NMR (400 MHz,  $\text{CDCl}_3$ )  $\delta$  8.61 (s, 1H), 7.57-7.46 (m, 2H), 7.38-7.31 (m, 2H), 7.23-7.19 (m, 3H), 7.17-7.10 (m, 2H), 6.74 (t,  $J = 2.8$  Hz, 1H), 6.54 (t,  $J = 2.8$  Hz, 1H), 2.22 (s, 3H).  $^{13}\text{C}$  NMR (101 MHz,  $\text{CDCl}_3$ )  $\delta$  191.61, 138.40, 136.49, 135.97, 131.29, 131.08, 129.25, 127.36, 127.30, 126.91, 126.69, 125.87, 119.57, 116.60, 112.66, 20.19. MS (EI, m/z): 261  $[\text{M}]^+$ . HRMS (ESI): Calcd. for  $\text{C}_{18}\text{H}_{15}\text{NO}$   $[\text{M}+\text{H}]^+$ : 262.1226; found: 262.1223.

### (3) (2-phenyl-1H-pyrrol-3-yl)(o-tolyl)methanone (3ac)

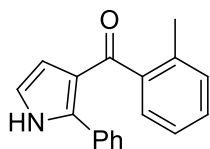

Yellow solid, 77% yield, m.p: 134-136 °C;  $^1\text{H}$  NMR (400 MHz,  $\text{CDCl}_3$ )  $\delta$  8.58 (s, 1H), 7.38-7.34 (m, 2H), 7.26-7.19 (m, 4H), 7.16-7.10 (m, 1H), 7.05 (d,  $J = 7.2$  Hz, 1H), 6.97 (t,  $J = 7.2$  Hz, 1H), 6.67 (t,  $J = 2.8$  Hz, 1H), 6.40 (t,  $J = 2.8$  Hz, 1H), 2.29 (s, 3H).  $^{13}\text{C}$

NMR (101 MHz, CDCl<sub>3</sub>)  $\delta$  194.23, 140.62, 137.60, 136.25, 131.90, 130.56, 129.52, 128.61, 128.54, 128.20, 128.14, 124.83, 121.67, 117.75, 113.78, 19.91. MS (EI, m/z): 261 [M]<sup>+</sup>. HRMS (ESI): Calcd. for C<sub>18</sub>H<sub>15</sub>NO [M+H]<sup>+</sup>: 262.1226; found: 262.1225.

**(4) phenyl(2-phenyl-1H-pyrrol-3-yl)methanone (3ad)**

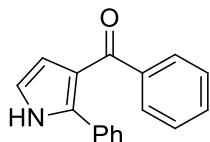

Red solid, 83% yield, m.p: 131-134 °C; <sup>1</sup>H NMR (400 MHz, CDCl<sub>3</sub>)  $\delta$  8.72 (s, 1H), 7.72-7.67 (m, 2H), 7.39-7.31 (m, 3H), 7.27-7.21 (m, 2H), 7.20-7.15 (m, 3H), 6.70 (t, *J* = 2.8 Hz, 1H), 6.51 (t, *J* = 2.8 Hz, 1H). <sup>13</sup>C NMR (101 MHz, CDCl<sub>3</sub>)  $\delta$  192.60, 139.56, 137.17, 132.02, 131.61, 129.67, 128.44, 128.35, 127.97, 127.85, 120.40, 117.75, 113.71. MS (EI, m/z): 247 [M]<sup>+</sup>. HRMS (ESI): Calcd. for C<sub>17</sub>H<sub>13</sub>NO [M+H]<sup>+</sup>: 268.1070; found: 248.1068.

**(5) (4-fluorophenyl)(2-phenyl-1H-pyrrol-3-yl)methanone (3ae)**

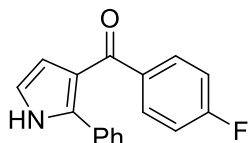

Yellow solid, 78% yield, m.p: 123-125 °C; <sup>1</sup>H NMR (400 MHz, CDCl<sub>3</sub>)  $\delta$  8.59 (s, 1H), 7.75-7.68 (m, 2H), 7.36-7.28 (m, 2H), 7.24-7.19 (m, 3H), 6.94-6.86 (m, 2H), 6.76 (t, *J* = 2.8 Hz, 1H), 6.53 (t, *J* = 2.8 Hz, 1H). <sup>13</sup>C NMR (101 MHz, CDCl<sub>3</sub>)  $\delta$  189.97, 163.82 (d, *J*<sub>C-F</sub> = 253.5 Hz), 135.99, 134.68 (d, *J*<sub>C-F</sub> = 3.0 Hz), 131.08 (d, *J*<sub>C-F</sub> = 9.0 Hz), 130.85, 127.39, 127.07, 119.28, 116.83, 113.82 (d, *J*<sub>C-F</sub> = 21.2 Hz), 112.45. MS (EI, m/z): 265 [M]<sup>+</sup>. HRMS (ESI): Calcd. for C<sub>17</sub>H<sub>12</sub>FNO [M+H]<sup>+</sup>: 266.0976; found: 266.0974.

**(6) (4-chlorophenyl)(2-phenyl-1H-pyrrol-3-yl)methanone (3af)**

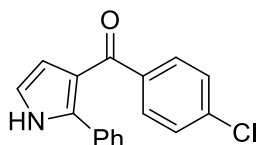

Yellow solid, 73% yield, m.p: 108-110 °C; <sup>1</sup>H NMR (400 MHz, CDCl<sub>3</sub>)  $\delta$  8.68 (s, 1H),



7.62 (d,  $J = 8.0$  Hz, 2H), 7.47-7.28 (m, 2H), 7.26-7.09 (m, 5H), 6.73 (t,  $J = 2.8$  Hz, 1H), 6.50 (t,  $J = 2.8$  Hz, 1H).  $^{13}\text{C}$  NMR (101 MHz,  $\text{CDCl}_3$ )  $\delta$  191.16, 137.87, 137.82, 137.28, 131.84, 131.05, 128.47, 128.45, 128.18, 128.12, 120.14, 117.94, 113.50. MS (EI,  $m/z$ ): 281  $[\text{M}]^+$ . HRMS (ESI): Calcd. for  $\text{C}_{17}\text{H}_{12}\text{ClNO}$   $[\text{M}+\text{H}]^+$ : 282.0680; found: 282.0678.

**(7) (4-bromophenyl)(2-phenyl-1H-pyrrol-3-yl)methanone (3ag)**

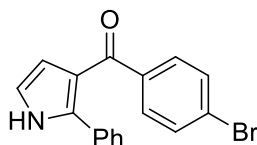

Yellow solid, 71% yield, m.p: 115-117 °C;  $^1\text{H}$  NMR (400 MHz,  $\text{CDCl}_3$ )  $\delta$  8.77 (s, 1H), 7.71-7.49 (m, 2H), 7.43-7.27 (m, 4H), 7.23-7.13 (m, 3H), 6.70 (s, 1H), 6.54-6.44 (m, 1H).  $^{13}\text{C}$  NMR (101 MHz,  $\text{CDCl}_3$ )  $\delta$  191.33, 138.33, 137.36, 131.20, 131.10, 129.67, 128.48, 128.43, 128.17, 126.43, 120.05, 117.98, 113.49. IR (KBr): 3151, 3040, 2919, 1591, 1570, 1489, 1453, 1429, 1343, 1256, 1190, 1153, 1065, 1013, 901, 801, 760, 730, 691  $\text{cm}^{-1}$ . MS (EI,  $m/z$ ): 325  $[\text{M}]^+$ . HRMS (ESI): Calcd. for  $\text{C}_{17}\text{H}_{12}\text{BrNO}$   $[\text{M}+\text{H}]^+$ : 326.0175; found: 326.0172.

**(8) (2-phenyl-1H-pyrrol-3-yl)(4-(trifluoromethyl)phenyl)methanone (3ah)**

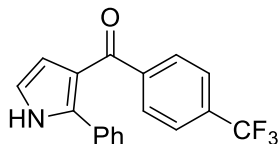

Red solid, 70% yield, m.p: 131-132 °C;  $^1\text{H}$  NMR (400 MHz,  $\text{CDCl}_3$ )  $\delta$  8.66 (s, 1H), 7.73 (d,  $J = 8.0$  Hz, 2H), 7.47 (d,  $J = 8.0$  Hz, 2H), 7.36-7.28 (m, 2H), 7.24-7.17 (m, 3H), 6.76 (t,  $J = 2.8$  Hz, 1H), 6.53 (t,  $J = 2.8$  Hz, 1H).  $^{13}\text{C}$  NMR (101 MHz,  $\text{CDCl}_3$ )  $\delta$  191.09, 142.73, 137.89, 132.79 (q,  $J_{\text{C-F}} = 32.3$  Hz), 131.69, 129.67, 128.60, 128.42, 128.37, 124.83 (q,  $J_{\text{C-F}} = 3.6$  Hz), 123.75 (d,  $J_{\text{C-F}} = 271.7$  Hz), 120.03, 118.10, 113.53. MS (EI,  $m/z$ ): 315  $[\text{M}]^+$ . HRMS (ESI): Calcd. for  $\text{C}_{18}\text{H}_{12}\text{F}_3\text{NO}$   $[\text{M}+\text{H}]^+$ : 316.0944; found: 316.0943.

**(9) 4-(2-phenyl-1H-pyrrole-3-carbonyl)benzonitrile (3ai)**

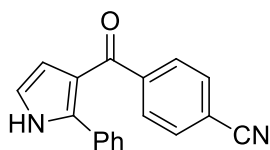

Yellow solid, 80% yield, m.p: 134-136 °C; <sup>1</sup>H NMR (400 MHz, CDCl<sub>3</sub>) δ 8.95 (s, 1H), 7.67 (d, *J* = 8.0 Hz, 2H), 7.47 (d, *J* = 8.0 Hz, 2H), 7.30-7.24 (m, 2H), 7.21-7.14 (m, 3H), 6.74 (t, *J* = 2.8 Hz, 1H), 6.51 (t, *J* = 2.8 Hz, 1H). <sup>13</sup>C NMR (101 MHz, CDCl<sub>3</sub>) δ 189.63, 142.30, 137.10, 130.63, 130.52, 128.76, 127.65, 127.42, 127.36, 118.70, 117.42, 117.27, 113.45, 112.26. MS (EI, m/z): 272 [M]<sup>+</sup>. HRMS (ESI): Calcd. for C<sub>18</sub>H<sub>12</sub>N<sub>2</sub>O [M+H]<sup>+</sup>: 273.1022; found: 273.1020.

**(10) (4-methoxyphenyl)(2-phenyl-1H-pyrrol-3-yl)methanone (3aj)**

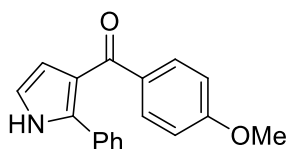

Yellow solid, 86% yield, m.p: 179-180 °C; <sup>1</sup>H NMR (400 MHz, CDCl<sub>3</sub>) δ 8.53 (s, 1H), 7.74 (d, *J* = 8.8 Hz, 2H), 7.39-7.34 (m, 2H), 7.26-7.15 (m, 3H), 6.79-6.72 (m, 3H), 6.52 (t, *J* = 2.8 Hz, 1H), 3.75 (s, 3H). <sup>13</sup>C NMR (101 MHz, CDCl<sub>3</sub>) δ 190.31, 161.52, 135.22, 131.09, 130.99, 127.41, 127.21, 126.81, 119.68, 116.50, 112.48, 112.07, 53.34. MS (EI, m/z): 277 [M]<sup>+</sup>. HRMS (ESI): Calcd. for C<sub>18</sub>H<sub>15</sub>NO<sub>2</sub> [M+H]<sup>+</sup>: 278.1176; found: 278.1174.

**(11) (3,4-dimethoxyphenyl)(2-phenyl-1H-pyrrol-3-yl)methanone (3ak)**

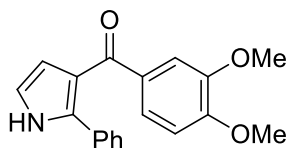

Black solid, 70% yield, m.p: 58-60 °C; <sup>1</sup>H NMR (400 MHz, CDCl<sub>3</sub>) δ 8.63 (s, 1H), 7.40 (dd, *J* = 8.4 Hz, 1.6 Hz, 1H), 7.38-7.31 (m, 3H), 7.24-7.14 (m, 3H), 6.75 (t, *J* = 2.8 Hz, 1H), 6.70 (d, *J* = 8.4 Hz, 1H), 6.54 (d, *J* = 2.8 Hz, 1H), 3.82 (s, 3H), 3.75 (s, 3H). <sup>13</sup>C NMR (101 MHz, CDCl<sub>3</sub>) δ 190.31, 151.24, 147.41, 135.21, 131.13, 131.06, 127.43, 127.18, 126.84, 123.61, 119.59, 116.66, 112.49, 111.13, 108.64, 54.95, 54.84. MS (EI,

m/z): 307 [M]<sup>+</sup>. HRMS (ESI): Calcd. for C<sub>19</sub>H<sub>17</sub>NO<sub>3</sub> [M+H]<sup>+</sup>: 308.1281; found: 308.1280.

**(12) (4-methoxyphenyl)(2-(m-tolyl)-1H-pyrrol-3-yl)methanone (3al)**

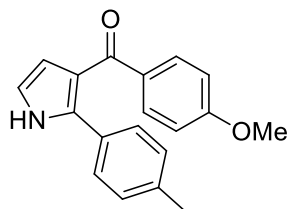

Red solid, 77% yield, m.p: 100-102 °C; <sup>1</sup>H NMR (400 MHz, CDCl<sub>3</sub>) δ 8.67 (s, 1H), 7.81 (d, *J* = 8.8 Hz, 2H), 7.26 (d, *J* = 8.0 Hz, 2H), 7.08 (d, *J* = 8.0 Hz, 2H), 6.83 (d, *J* = 8.8 Hz, 2H), 6.76 (t, *J* = 2.8 Hz, 1H), 6.55 (t, *J* = 2.8 Hz, 1H), 3.83 (s, 3H), 2.31 (s, 3H). <sup>13</sup>C NMR (101 MHz, CDCl<sub>3</sub>) δ 191.41, 162.52, 137.70, 136.58, 132.27, 132.04, 129.27, 129.12, 128.13, 120.31, 117.28, 113.45, 113.11, 55.39, 21.24. MS (EI, m/z): 291 [M]<sup>+</sup>. HRMS (ESI): Calcd. for C<sub>19</sub>H<sub>17</sub>NO<sub>2</sub> [M+H]<sup>+</sup>: 292.1332; found: 292.1330.

**(13) 3-(3-(4-methoxybenzoyl)-1H-pyrrol-2-yl)benzonitrile (3am)**

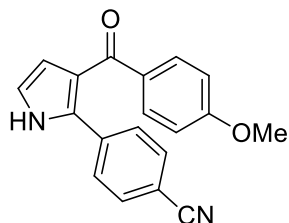

Crimson solid, 67% yield, m.p: 86-87 °C; <sup>1</sup>H NMR (400 MHz, CDCl<sub>3</sub>) δ 8.82 (s, 1H), 7.77 (d, *J* = 8.8 Hz, 2H), 7.49 (s, 4H), 6.81 (d, *J* = 8.4 Hz, 3H), 6.51 (s, 1H), 3.79 (s, 3H). <sup>13</sup>C NMR (101 MHz, CDCl<sub>3</sub>) δ 191.22, 163.07, 136.40, 133.51, 132.20, 131.64, 128.44, 122.25, 118.96, 118.76, 114.25, 113.40, 110.94, 55.48. MS (EI, m/z): 302 [M]<sup>+</sup>. HRMS (ESI): Calcd. for C<sub>19</sub>H<sub>14</sub>N<sub>2</sub>O<sub>2</sub> [M+H]<sup>+</sup>: 303.1128; found: 303.1126.

**(14) (2-(m-tolyl)-1H-pyrrol-3-yl)(4-(trifluoromethyl)phenyl)methanone (3an)**

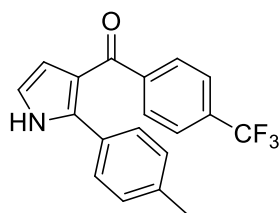

Red solid, 80% yield, m.p: 165-166 °C;  $^1\text{H}$  NMR (400 MHz,  $\text{CDCl}_3$ )  $\delta$  8.61 (s, 1H), 7.71 (d,  $J = 8.0$  Hz, 2H), 7.46 (d,  $J = 8.0$  Hz, 2H), 7.20 (d,  $J = 8.0$  Hz, 2H), 7.00 (d,  $J = 8.0$  Hz, 2H), 6.73 (t,  $J = 2.8$  Hz, 1H), 6.52 (t,  $J = 2.8$  Hz, 1H), 2.24 (s, 3H).  $^{13}\text{C}$  NMR (101 MHz,  $\text{CDCl}_3$ )  $\delta$  190.02, 141.83, 137.37, 137.16, 131.58 (q,  $J_{\text{C-F}} = 32.3$  Hz), 128.57, 128.03, 127.74, 127.46, 123.73 (q,  $J_{\text{C-F}} = 3.6$  Hz), 122.58 (d,  $J_{\text{C-F}} = 271.7$  Hz), 118.80, 116.79, 112.35, 20.12. MS (EI, m/z): 329  $[\text{M}]^+$ . HRMS (ESI): Calcd. for  $\text{C}_{19}\text{H}_{14}\text{F}_3\text{NO}$   $[\text{M}+\text{H}]^+$ : 330.1100; found: 330.1099.

**(15) 3-(3-(4-cyanobenzoyl)-1H-pyrrol-2-yl)benzonitrile (3ao)**

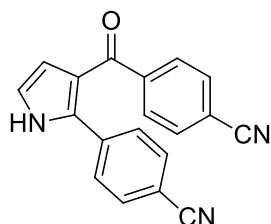

Yellow solid, 62% yield, m.p: 222-223 °C;  $^1\text{H}$  NMR (400 MHz,  $\text{CDCl}_3$ )  $\delta$  8.74 (s, 1H), 7.86-7.76 (m, 2H), 7.70-7.62 (m, 2H), 7.59 (s, 4H), 6.87 (t,  $J = 2.8$  Hz, 1H), 6.47 (t,  $J = 2.8$  Hz, 1H).  $^{13}\text{C}$  NMR (101 MHz,  $\text{CDCl}_3$ )  $\delta$  189.07, 141.84, 134.85, 134.16, 131.27, 131.02, 128.84, 127.91, 119.67, 118.27, 117.45, 117.09, 114.26, 113.40, 110.89. MS (EI, m/z): 297  $[\text{M}]^+$ . HRMS (ESI): Calcd. for  $\text{C}_{19}\text{H}_{11}\text{N}_3\text{O}$   $[\text{M}+\text{H}]^+$ : 298.0975; found: 298.0973.

**(16) furan-2-yl(2-phenyl-1H-pyrrol-3-yl)methanone (3ap)**

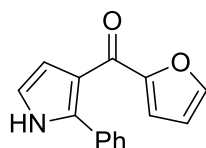

Yellow solid, 69% yield, m.p: 141-143 °C;  $^1\text{H}$  NMR (400 MHz,  $\text{CDCl}_3$ )  $\delta$  8.66 (s, 1H),

7.50-7.37 (m, 3H), 7.33-7.20 (m, 3H), 7.07-6.99 (m, 1H), 6.80 (t,  $J = 2.8$  Hz, 1H), 6.75 (t,  $J = 2.8$  Hz, 1H), 6.38 (dd,  $J = 3.5, 1.6$  Hz, 1H).  $^{13}\text{C}$  NMR (101 MHz,  $\text{CDCl}_3$ )  $\delta$  178.47, 153.64, 145.73, 137.17, 132.17, 128.43, 128.39, 128.10, 119.45, 118.48, 117.94, 112.69, 111.84. MS (EI,  $m/z$ ): 237  $[\text{M}]^+$ . HRMS (ESI): Calcd. for  $\text{C}_{15}\text{H}_{11}\text{NO}_2$   $[\text{M}+\text{H}]^+$ : 238.0863; found: 238.0861.

**(17) (2-phenyl-1H-pyrrol-3-yl)(pyridin-2-yl)methanone (3aq)**

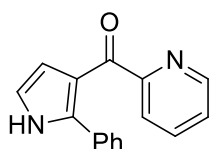

Black solid, 58% yield, m.p: 127-129 °C;  $^1\text{H}$  NMR (400 MHz,  $\text{CDCl}_3$ )  $\delta$  8.65 (s, 1H), 8.43 (d,  $J = 4.8$  Hz, 1H), 7.80 (d,  $J = 8.0$  Hz, 1H), 7.71-7.64 (m, 1H), 7.44-7.34 (m, 2H), 7.28-7.16 (m, 4H), 6.85 (t,  $J = 2.8$  Hz, 1H), 6.75 (t,  $J = 2.8$  Hz, 1H).  $^{13}\text{C}$  NMR (101 MHz,  $\text{CDCl}_3$ )  $\delta$  188.73, 155.56, 147.18, 137.78, 135.57, 131.41, 127.62, 127.24, 127.04, 124.41, 122.80, 118.42, 116.93, 113.19. MS (EI,  $m/z$ ): 248  $[\text{M}]^+$ . HRMS (ESI): Calcd. for  $\text{C}_{16}\text{H}_{12}\text{N}_2\text{O}$   $[\text{M}+\text{H}]^+$ : 249.1022; found: 249.1020.

**(18) naphthalen-1-yl(2-phenyl-1H-pyrrol-3-yl)methanone (3ar)**

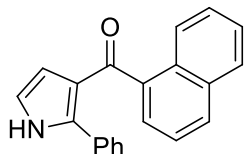

Crimson solid, 85% yield, m.p: 164-165 °C;  $^1\text{H}$  NMR (400 MHz,  $\text{CDCl}_3$ )  $\delta$  8.60 (brs, 1H), 8.15 (d,  $J = 3.6$  Hz, 1H), 7.77-7.67 (m, 2H), 7.48 (d,  $J = 7.2$  Hz, 1H), 7.44-7.35 (m, 2H), 7.32-7.25 (m, 2H), 7.25-7.17 (m, 1H), 7.14-7.00 (m, 3H), 6.71-6.60 (m, 1H), 6.50-6.41 (m, 1H).  $^{13}\text{C}$  NMR (101 MHz,  $\text{CDCl}_3$ )  $\delta$  193.47, 138.32, 138.09, 133.54, 131.87, 130.88, 130.44, 128.48, 128.09, 128.04, 127.41, 126.78, 125.97, 125.80, 124.21, 122.24, 117.85, 113.80. MS (EI,  $m/z$ ): 297  $[\text{M}]^+$ . HRMS (ESI): Calcd. for  $\text{C}_{21}\text{H}_{15}\text{NO}$   $[\text{M}+\text{H}]^+$ : 298.1226; found: 298.1224.

**(19) 2,2-dimethyl-1-(2-phenyl-1H-pyrrol-3-yl)propan-1-one (3as)**

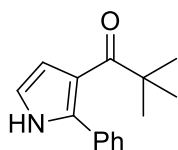

Crimson solid, 73% yield, m.p: 55-56 °C;  $^1\text{H}$  NMR (400 MHz,  $\text{CDCl}_3$ )  $\delta$  8.38 (s, 1H), 7.37-7.33 (m, 2H), 7.31-7.22 (m, 3H), 6.64 (t,  $J = 2.8$  Hz, 1H), 6.58 (t,  $J = 2.8$  Hz, 1H), 1.24 (s, 9H).  $^{13}\text{C}$  NMR (101 MHz,  $\text{CDCl}_3$ )  $\delta$  204.69, 136.54, 133.12, 128.50, 127.86, 119.21, 116.98, 111.00, 44.32, 27.95. MS (EI, m/z): 227  $[\text{M}]^+$ . HRMS (ESI): Calcd. for  $\text{C}_{15}\text{H}_{17}\text{NO}$   $[\text{M}+\text{H}]^+$ : 228.1383; found: 228.1381.

**(20) 1-(2-phenyl-1H-pyrrol-3-yl)butan-1-one (3at)**

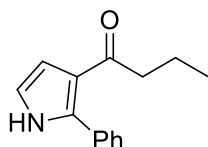

Red solid, 65% yield, m.p: 82-84 °C;  $^1\text{H}$  NMR (400 MHz,  $\text{CDCl}_3$ )  $\delta$  8.54 (s, 1H), 7.52-7.44 (m, 2H), 7.36-7.27 (m, 3H), 6.68 (t,  $J = 2.8$  Hz, 1H), 6.62 (t,  $J = 2.8$  Hz, 1H), 2.60 (t,  $J = 7.2$  Hz, 2H), 1.58 (h,  $J = 7.2$  Hz, 2H), 0.83 (t,  $J = 7.2$  Hz, 3H).  $^{13}\text{C}$  NMR (101 MHz,  $\text{CDCl}_3$ )  $\delta$  197.29, 136.14, 132.55, 129.04, 128.43, 128.29, 121.32, 117.68, 111.54, 42.79, 18.09, 13.95. MS (EI, m/z): 213  $[\text{M}]^+$ . HRMS (ESI): Calcd. for  $\text{C}_{14}\text{H}_{15}\text{NO}$   $[\text{M}+\text{H}]^+$ : 214.1226; found: 214.1224.

**(21) 1-(2-phenyl-1H-pyrrol-3-yl)butan-1-one (3au)**

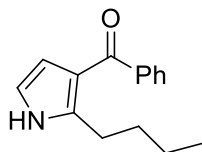

Yellow oil, 78% yield;  $^1\text{H}$  NMR (400 MHz,  $\text{CDCl}_3$ )  $\delta$  9.45 (s, 1H), 7.80 (d,  $J = 7.2$  Hz, 2H), 7.53-7.47 (m, 1H), 7.46-7.39 (m, 2H), 6.51 (t,  $J = 2.8$  Hz, 1H), 6.37 (t,  $J = 2.8$  Hz, 1H), 2.96 (t,  $J = 7.6$  Hz, 2H), 1.62 (p,  $J = 7.6$  Hz, 2H), 1.32 (h,  $J = 7.6$  Hz, 2H), 0.87 (t,  $J = 7.6$  Hz, 3H).  $^{13}\text{C}$  NMR (101 MHz,  $\text{CDCl}_3$ )  $\delta$  193.07, 141.77, 140.85, 131.19, 129.08, 128.06, 119.01, 115.81, 122.69, 31.50, 27.46, 22.62, 13.92. MS (EI, m/z): 227  $[\text{M}]^+$ . HRMS (ESI): Calcd. for  $\text{C}_{15}\text{H}_{17}\text{NO}$   $[\text{M}+\text{H}]^+$ : 228.1383; found: 228.1381.

**(22) (2-cyclopropyl-1H-pyrrol-3-yl)(phenyl)methanone (3av)**

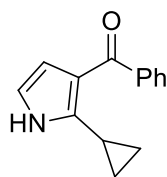

White solid, 77% yield; m.p: 106-107 °C;  $^1\text{H}$  NMR (400 MHz,  $\text{CDCl}_3$ )  $\delta$  8.94 (s, 1H), 7.86-7.78 (m, 2H), 7.53-7.48 (m, 1H), 7.47-7.41 (m, 2H), 6.45 (dd,  $J = 5.6$  Hz, 2.4 Hz, 1H), 6.34 (t,  $J = 2.8$  Hz, 1H), 2.72-2.54 (m, 1H), 1.01-0.93 (m, 2H), 0.79-0.72 (m, 2H).  $^{13}\text{C}$  NMR (101 MHz,  $\text{CDCl}_3$ )  $\delta$  192.92, 142.05, 140.82, 131.21, 129.16, 128.04, 120.61, 115.52, 112.79, 29.74, 9.09, 8.22. MS (EI, m/z): 211  $[\text{M}]^+$ . HRMS (ESI): Calcd. for  $\text{C}_{14}\text{H}_{13}\text{NO}$   $[\text{M}+\text{H}]^+$ : 212.1070; found: 212.1068.

**(23) (5-methyl-2-phenyl-1H-pyrrol-3-yl)(p-tolyl)methanone (3ba)**

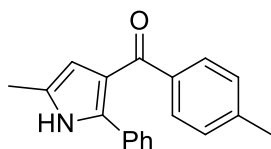

Yellow solid, 85% yield, m.p: 142-143 °C;  $^1\text{H}$  NMR (400 MHz,  $\text{CDCl}_3$ )  $\delta$  8.53 (s, 1H), 7.60 (d,  $J = 8.0$  Hz, 2H), 7.30 (d,  $J = 8.0$ , 2H), 7.16-7.09 (m, 3H), 7.02 (d,  $J = 8.0$  Hz, 2H), 6.13 (d,  $J = 2.8$  Hz, 1H), 2.27 (s, 3H), 2.18 (s, 3H).  $^{13}\text{C}$  NMR (101 MHz,  $\text{CDCl}_3$ )  $\delta$  191.35, 140.94, 135.96, 134.76, 131.21, 128.79, 127.41, 127.16, 127.13, 126.66, 126.39, 119.59, 110.12, 20.47, 11.64. MS (EI, m/z): 275  $[\text{M}]^+$ . HRMS (ESI): Calcd. for  $\text{C}_{19}\text{H}_{17}\text{NO}$   $[\text{M}+\text{H}]^+$ : 276.1383; found: 276.1382.

**(24) (4-chlorophenyl)(5-methyl-2-phenyl-1H-pyrrol-3-yl)methanone (3bf)**

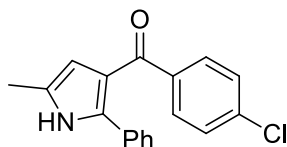

Black solid, 79% yield, m.p: 52-53 °C;  $^1\text{H}$  NMR (400 MHz,  $\text{CDCl}_3$ )  $\delta$  8.54 (s, 1H), 7.59 (d,  $J = 8.4$  Hz, 2H), 7.26 (d,  $J = 6.4, 2.8$  Hz, 2H), 7.19-7.12 (m, 5H), 6.15 (s, 1H), 2.20 (s, 3H).  $^{13}\text{C}$  NMR (101 MHz,  $\text{CDCl}_3$ )  $\delta$  190.20, 136.98, 136.55, 135.38, 130.95, 127.29,

127.27, 126.97, 126.77, 119.19, 109.89, 11.66. MS (EI, m/z): 295 [M]<sup>+</sup>. HRMS (ESI): Calcd. for C<sub>18</sub>H<sub>14</sub>ClNO [M+H]<sup>+</sup>: 296.0837; found: 296.0837.

**(25) (4-methoxyphenyl)(5-methyl-2-phenyl-1H-pyrrol-3-yl)methanone (3bj)**

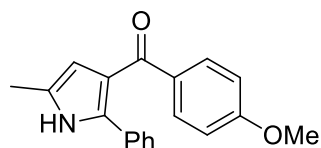

Yellow solid, 81% yield, m.p: 112-113 °C; <sup>1</sup>H NMR (400 MHz, CDCl<sub>3</sub>) δ 8.47 (s, 1H), 7.70 (d, *J* = 8.4 Hz, 2H), 7.29 (d, *J* = 6.8 Hz, 2H), 7.20-7.07 (m, 3H), 6.71 (d, *J* = 8.4 Hz, 2H), 6.15 (s, 1H), 3.73 (s, 3H), 2.20 (s, 3H). <sup>13</sup>C NMR (101 MHz, CDCl<sub>3</sub>) δ 190.50, 161.38, 134.31, 131.25, 131.23, 130.95, 127.24, 127.05, 126.71, 126.37, 119.73, 111.98, 109.96, 54.32, 11.70. MS (EI, m/z): 291 [M]<sup>+</sup>. HRMS (ESI): Calcd. for C<sub>19</sub>H<sub>17</sub>NO<sub>2</sub> [M+H]<sup>+</sup>: 292.1332; found: 292.1331.

**(26) (5-ethyl-2-phenyl-1H-pyrrol-3-yl)(p-tolyl)methanone (3ca)**

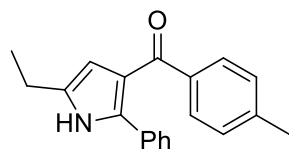

Green solid, 80% yield, m.p: 162-163 °C; <sup>1</sup>H NMR (400 MHz, CDCl<sub>3</sub>) δ 8.27 (s, 1H), 7.31 (d, *J* = 4.8 Hz, 2H), 7.23-7.07 (m, 6H), 7.03 (d, *J* = 7.6 Hz, 1H), 6.94 (t, *J* = 7.6 Hz, 1H), 6.10 (s, 1H), 2.53 (q, *J* = 7.6 Hz, 2H), 2.28 (s, 3H), 1.17 (t, *J* = 7.6 Hz, 3H). <sup>13</sup>C NMR (101 MHz, CDCl<sub>3</sub>) δ 193.15, 139.75, 135.59, 135.07, 133.19, 131.05, 129.39, 128.27, 127.47, 127.47, 127.02, 126.77, 123.71, 120.58, 108.28, 19.43, 18.82, 12.14. MS (EI, m/z): 289 [M]<sup>+</sup>. HRMS (ESI): Calcd. for C<sub>20</sub>H<sub>19</sub>NO [M+H]<sup>+</sup>: 290.1539; found: 290.1538.

**(27) (5-ethyl-2-phenyl-1H-pyrrol-3-yl)(phenyl)methanone (3cd)**

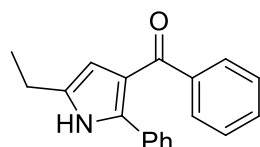

Yellow solid, 82% yield, m.p: 79-80 °C; <sup>1</sup>H NMR (400 MHz, CDCl<sub>3</sub>) δ 8.30 (s, 1H),



7.68 (d,  $J = 7.6$  Hz, 2H), 7.31 (d,  $J = 7.2$  Hz, 3H), 7.24-7.14 (m, 5H), 6.23 (s, 1H), 2.59 (q,  $J = 7.6$  Hz, 2H), 1.21 (t,  $J = 7.6$  Hz, 3H).  $^{13}\text{C}$  NMR (101 MHz,  $\text{CDCl}_3$ )  $\delta$  192.56, 139.72, 136.06, 134.22, 132.27, 131.39, 129.62, 128.35, 128.28, 127.76, 127.68, 120.48, 109.54, 20.57, 13.29. MS (EI,  $m/z$ ): 275  $[\text{M}]^+$ . HRMS (ESI): Calcd. for  $\text{C}_{19}\text{H}_{17}\text{NO}$   $[\text{M}+\text{H}]^+$ : 276.1383; found: 276.1380.

**(28) (5-ethyl-2-phenyl-1H-pyrrol-3-yl)(4-(trifluoromethyl)phenyl)methanone (3ch)**

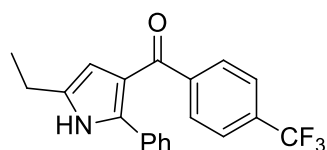

Yellow solid, 79% yield, m.p: 150-152 °C;  $^1\text{H}$  NMR (400 MHz,  $\text{CDCl}_3$ )  $\delta$  8.54 (s, 1H), 7.68 (d,  $J = 8.4$  Hz, 2H), 7.43 (d,  $J = 8.4$  Hz, 2H), 7.27-7.11 (m, 5H), 6.20 (d,  $J = 2.8$  Hz, 1H), 2.56 (q,  $J = 7.6$  Hz, 2H), 1.20 (t,  $J = 7.6$  Hz, 3H).  $^{13}\text{C}$  NMR (101 MHz,  $\text{CDCl}_3$ )  $\delta$  191.27, 142.95, 137.04, 134.77, 132.56 (q,  $J_{\text{C-F}} = 32.3$  Hz), 131.92, 129.61, 128.55, 128.27, 128.02, 124.74 (q,  $J_{\text{C-F}} = 3.6$  Hz), 123.81 (q,  $J_{\text{C-F}} = 271.7$  Hz), 120.03, 109.20, 20.50, 13.24. MS (EI,  $m/z$ ): 343  $[\text{M}]^+$ . HRMS (ESI): Calcd. for  $\text{C}_{20}\text{H}_{16}\text{F}_3\text{NO}$   $[\text{M}+\text{H}]^+$ : 344.1257; found: 344.1255.

**(29) (5-ethyl-2-phenyl-1H-pyrrol-3-yl)(4-methoxyphenyl)methanone (3cj)**

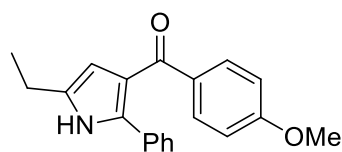

Yellow solid, 77% yield, m.p: 60-61 °C;  $^1\text{H}$  NMR (400 MHz,  $\text{CDCl}_3$ )  $\delta$  8.29 (s, 1H), 7.71 (d,  $J = 8.4$  Hz, 2H), 7.32 (d,  $J = 8.0$  Hz, 2H), 7.18-7.11 (m, 3H), 6.72 (d,  $J = 8.4$  Hz, 2H), 6.20 (s, 1H), 3.74 (s, 3H), 2.59 (q,  $J = 7.6$  Hz, 2H), 1.22 (t,  $J = 7.6$  Hz, 3H).  $^{13}\text{C}$  NMR (101 MHz,  $\text{CDCl}_3$ )  $\delta$  190.47, 161.37, 134.12, 133.09, 131.34, 131.25, 130.94, 127.28, 127.10, 126.44, 119.68, 111.99, 108.34, 54.31, 19.54, 12.27. MS (EI,  $m/z$ ): 305  $[\text{M}]^+$ . HRMS (ESI): Calcd. for  $\text{C}_{20}\text{H}_{19}\text{NO}_2$   $[\text{M}+\text{H}]^+$ : 306.1489; found: 306.1487.

**(30) (5-isobutyl-2-phenyl-1H-pyrrol-3-yl)(p-tolyl)methanone (3da)**

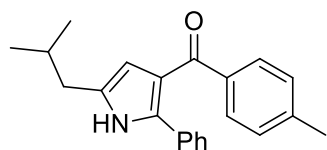

Yellow solid, 74% yield, m.p: 121-122 °C; <sup>1</sup>H NMR (400 MHz, CDCl<sub>3</sub>) δ 8.27 (s, 1H), 7.35-7.30 (m, 2H), 7.25-7.20 (m, 1H), 7.17-7.10 (m, 4H), 7.03 (d, *J* = 7.6 Hz, 1H), 6.95 (t, *J* = 7.6 Hz, 1H), 6.07 (d, *J* = 2.8 Hz, 1H), 2.35 (d, *J* = 7.2 Hz, 2H), 2.28 (s, 3H), 1.84-1.73 (m, 1H), 0.87 (d, *J* = 7.2 Hz, 6H). <sup>13</sup>C NMR (101 MHz, CDCl<sub>3</sub>) δ 193.23, 135.41, 135.12, 131.08, 130.80, 129.42, 128.31, 127.56, 127.39, 127.05, 126.76, 123.74, 120.66, 110.08, 35.67, 27.88, 21.36, 18.86. MS (EI, m/z): 317 [M]<sup>+</sup>. HRMS (ESI): Calcd. for C<sub>22</sub>H<sub>23</sub>NO [M+H]<sup>+</sup>: 318.1852; found: 318.1848.

**(31) (4-fluorophenyl)(5-isobutyl-2-phenyl-1H-pyrrol-3-yl)methanone (3de)**

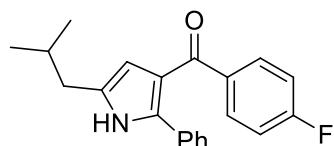

Yellow solid, 81% yield, m.p: 96-97 °C; <sup>1</sup>H NMR (400 MHz, CDCl<sub>3</sub>) δ 8.25 (s, 1H), 7.77-7.64 (m, 2H), 7.34-7.27 (m, 3H), 7.17-7.15 (m, 2H), 6.88 (t, *J* = 8.8 Hz, 2H), 6.21 (d, *J* = 2.8 Hz, 1H), 2.42 (d, *J* = 7.2 Hz, 2H), 1.89-1.78 (m, 1H), 0.90 (d, *J* = 7.2 Hz, 6H). <sup>13</sup>C NMR (101 MHz, CDCl<sub>3</sub>) δ 191.09, 164.76 (d, *J*<sub>C-F</sub> = 252.5 Hz), 135.91, 132.13, 132.04, 131.97, 129.26, 128.36, 128.32, 127.79, 120.39, 114.79 (d, *J*<sub>C-F</sub> = 21.21 Hz), 111.06, 36.79, 29.00, 22.43. MS (EI, m/z): 321 [M]<sup>+</sup>. HRMS (ESI): Calcd. for C<sub>21</sub>H<sub>20</sub>FNO [M+H]<sup>+</sup>: 322.1602; found: 322.1598.

**(32) (5-isobutyl-2-phenyl-1H-pyrrol-3-yl)(4-methoxyphenyl)methanone (3dj)**

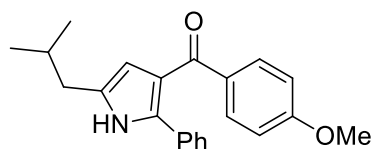

Yellow solid, 76% yield, m.p: 40-41 °C; <sup>1</sup>H NMR (400 MHz, CDCl<sub>3</sub>) δ 8.55 (s, 1H), 7.78 (d, *J* = 8.8 Hz, 2H), 7.43-7.35 (m, 2H), 7.24-7.16 (m, 3H), 6.79 (d, *J* = 8.8 Hz, 2H), 6.24 (s, 1H), 3.81 (s, 3H), 2.46 (d, *J* = 7.2 Hz, 2H), 1.95-1.83 (m, 1H), 0.95 (d, *J* = 7.2

Hz, 6H).  $^{13}\text{C}$  NMR (101 MHz,  $\text{CDCl}_3$ )  $\delta$  191.67, 162.43, 135.25, 132.38, 132.04, 131.78, 128.30, 128.17, 127.43, 120.65, 113.05, 111.15, 55.38, 36.78, 29.00, 22.46. MS (EI,  $m/z$ ): 333  $[\text{M}]^+$ . HRMS (ESI): Calcd. for  $\text{C}_{22}\text{H}_{23}\text{NO}_2$   $[\text{M}+\text{H}]^+$ : 334.1802; found: 334.1797.

**(33) (2,5-diphenyl-1H-pyrrol-3-yl)(p-tolyl)methanone (3ea)**

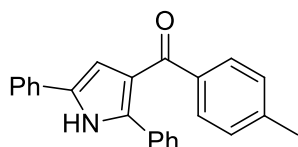

Yellow solid, 78% yield, m.p: 196-198 °C;  $^1\text{H}$  NMR (400 MHz,  $\text{CDCl}_3$ )  $\delta$  8.70 (s, 1H), 7.46-7.38 (m, 4H), 7.34-7.26 (m, 3H), 7.23-7.13 (m, 5H), 7.07 (d,  $J = 7.2$  Hz, 1H), 7.02-6.95 (m, 1H), 6.67 (d,  $J = 2.8$  Hz, 1H), 2.32 (s, 3H).  $^{13}\text{C}$  NMR (101 MHz,  $\text{CDCl}_3$ )  $\delta$  193.03, 139.34, 137.27, 135.34, 130.79, 130.62, 130.23, 129.58, 128.61, 128.00, 127.66, 127.53, 127.27, 127.21, 126.15, 123.85, 123.01, 109.34, 18.91. MS (EI,  $m/z$ ): 337  $[\text{M}]^+$ . HRMS (ESI): Calcd. for  $\text{C}_{24}\text{H}_{19}\text{NO}$   $[\text{M}+\text{H}]^+$ : 338.1539; found: 338.1536.

**(34) (2,5-diphenyl-1H-pyrrol-3-yl)(phenyl)methanone (3ed)**

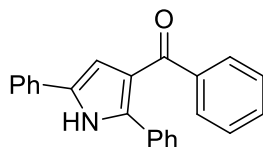

Yellow solid, 79% yield, m.p: 148-149 °C;  $^1\text{H}$  NMR (400 MHz,  $\text{CDCl}_3$ )  $\delta$  8.92 (s, 1H), 7.76-7.68 (m, 2H), 7.46 (d,  $J = 7.6$  Hz, 2H), 7.39-7.28 (m, 5H), 7.25-7.14 (m, 6H), 6.76 (d,  $J = 2.8$  Hz, 1H).  $^{13}\text{C}$  NMR (101 MHz,  $\text{CDCl}_3$ )  $\delta$  191.48, 138.31, 136.87, 130.85, 130.69, 130.37, 128.66, 127.99, 127.43, 127.32, 127.06, 126.85, 126.08, 123.09, 120.85, 109.43. MS (EI,  $m/z$ ): 323  $[\text{M}]^+$ . HRMS (ESI): Calcd. for  $\text{C}_{23}\text{H}_{17}\text{NO}$   $[\text{M}+\text{H}]^+$ : 324.1383; found: 324.1380.

**(35) (2,5-diphenyl-1H-pyrrol-3-yl)(4-methoxyphenyl)methanone (3ej)**

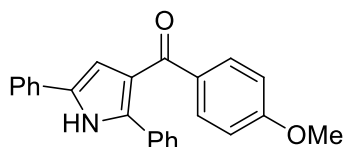

Yellow solid, 72% yield, m.p: 186-187 °C; <sup>1</sup>H NMR (400 MHz, CDCl<sub>3</sub>) δ 8.93 (s, 1H), 7.75 (d, *J* = 8.8 Hz, 2H), 7.49-7.45 (m, 2H), 7.38-7.28 (m, 4H), 7.21-7.13 (m, 4H), 6.74 (dd, *J* = 6.4 Hz, 3.0 Hz, 3H), 3.75 (s, 3H). <sup>13</sup>C NMR (101 MHz, CDCl<sub>3</sub>) δ 190.40, 161.63, 136.07, 131.06, 130.88, 130.78, 130.49, 127.98, 127.38, 127.24, 126.88, 125.98, 123.07, 121.11, 112.13, 109.31, 54.36. IR (KBr): 3137, 3001, 2969, 2842, 1589, 1562, 1508, 1452, 1432, 1339, 1243, 1170, 1152, 1032, 903, 846, 762, 695 cm<sup>-1</sup>. MS (EI, m/z): 353 [M]<sup>+</sup>. HRMS (ESI): Calcd. for C<sub>24</sub>H<sub>19</sub>NO<sub>2</sub> [M+H]<sup>+</sup>: 354.1489; found: 354.1487.

**(36) (2,4-diphenyl-1H-pyrrol-3-yl)(p-tolyl)methanone (3fa)**

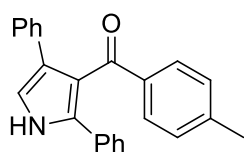

Yellow solid, 76% yield, m.p: 193-195 °C; <sup>1</sup>H NMR (400 MHz, CDCl<sub>3</sub>) δ 10.22 (s, 1H), 7.78-7.69 (m, 2H), 7.54-7.47 (m, 2H), 7.45-7.38 (m, 2H), 7.37-7.30 (m, 1H), 7.29-7.22 (m, 1H), 7.07 (t, *J* = 7.6 Hz, 2H), 7.01-6.93 (m, 2H), 6.85 (d, *J* = 7.6 Hz, 2H), 6.68 (d, *J* = 2.8 Hz, 1H), 2.23 (s, 3H). <sup>13</sup>C NMR (101 MHz, CDCl<sub>3</sub>) δ 185.98, 137.08, 136.47, 135.26, 134.46, 131.37, 130.05, 129.82, 128.49, 128.38, 128.01, 127.35, 127.19, 126.95, 126.45, 124.16, 109.32, 20.03. MS (EI, m/z): 337 [M]<sup>+</sup>. HRMS (ESI): Calcd. for C<sub>24</sub>H<sub>19</sub>NO [M+H]<sup>+</sup>: 338.1539; found: 338.1536.

**(37) (2-phenyl-4,5,6,7-tetrahydro-1H-indol-3-yl)(p-tolyl)methanone (3ga)**

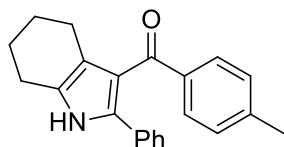

Yellow solid, 65% yield, m.p: 151-153 °C; <sup>1</sup>H NMR (400 MHz, CDCl<sub>3</sub>) δ 8.06 (s, 1H), 7.52 (d, *J* = 8.0 Hz, 2H), 7.15-7.00 (m, 5H), 6.91 (d, *J* = 8.0 Hz, 2H), 2.56 (t, *J* = 6.4 Hz, 2H), 2.46 (t, *J* = 6.4 Hz, 2H), 2.20 (s, 3H), 1.82-1.73 (m, 2H), 1.70-1.62 (m, 2H). <sup>13</sup>C NMR (101 MHz, CDCl<sub>3</sub>) δ 193.94, 142.13, 136.89, 134.32, 132.60, 129.97, 128.40, 128.26, 127.94, 126.96, 120.39, 119.57, 23.43, 22.94, 22.79, 22.64, 21.51. MS (EI,

m/z): 315 [M]<sup>+</sup>. HRMS (ESI): Calcd. for C<sub>22</sub>H<sub>21</sub>NO [M+H]<sup>+</sup>: 316.1696; found: 316.1690.

**(38) phenyl(4-phenyl-1H-pyrrol-3-yl)methanone (3fw)**

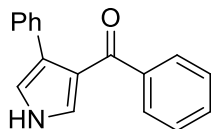

White solid, 80% yield, m.p: 229-231 °C; <sup>1</sup>H NMR (400 MHz, DMSO-*d*<sub>6</sub>) δ 7.76-7.72 (m, 2H), 7.59-7.53 (m, 1H), 7.46 (t, *J* = 7.6 Hz, 2H), 7.39-7.35 (m, 2H), 7.30-7.19 (m, 3H), 7.19-7.14 (m, 1H), 7.08 (t, *J* = 2.4 Hz, 1H). <sup>13</sup>C NMR (101 MHz, DMSO-*d*<sub>6</sub>) δ 190.80, 140.44, 135.71, 132.01, 129.42, 128.82, 128.63, 128.58, 128.20, 126.11, 125.95, 120.98, 120.10. MS (EI, m/z): 247 [M]<sup>+</sup>. HRMS (ESI): Calcd. for C<sub>17</sub>H<sub>13</sub>NO [M+H]<sup>+</sup>: 248.1070; found: 248.1067.

**(39) (5,5-difluoro-3,7,10-triphenyl-5H-4l4,5l4-dipyrrolo[1,2-c:2',1'-f][1,3,2]diazaborinine-2,8-diyl)bis(p-tolylmethanone) (3aaa)**

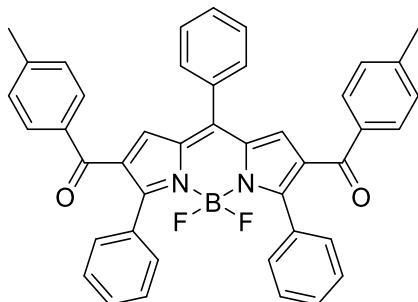

Red solid, 90% yield, m.p: 253-255 °C; <sup>1</sup>H NMR (400 MHz, CDCl<sub>3</sub>) δ 7.79-7.74 (m, 8H), 7.59-7.55 (m, 2H), 7.48-7.44 (m, 2H), 7.41-7.36 (m, 6H), 7.18 (d, *J* = 8.0 Hz, 4H), 6.99 (s, 2H), 5.30 (s, 1H), 2.38 (s, 6H). <sup>13</sup>C NMR (101 MHz, CDCl<sub>3</sub>) δ 192.15, 155.70, 143.66, 140.11, 135.82, 133.71, 132.57, 130.78, 130.16, 129.99, 129.73, 129.58, 129.04, 128.64, 128.56, 128.18, 21.68. HRMS (ESI): Calcd. for C<sub>43</sub>H<sub>31</sub>BF<sub>2</sub>N<sub>2</sub>O<sub>2</sub> [M+e]<sup>-</sup>: 656.2452; found: 656.2446.

**(40) phenyl(4-phenyl-1H-pyrrol-3-yl)methanone (intermediate 4aa)**

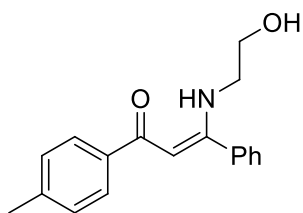

White solid, 62% yield, m.p: 114-115 °C;  $^1\text{H}$  NMR (400 MHz,  $\text{CDCl}_3$ )  $\delta$  11.41 (br, 1H), 7.76 (d,  $J = 8.4$  Hz, 2H), 7.44-7.36 (m, 3H), 7.36-7.31 (m, 2H), 7.18 (d,  $J = 8.0$  Hz, 2H), 5.72 (s, 1H), 4.06 (br, 1H), 3.71 (t,  $J = 5.2$  Hz, 2H), 3.35 (q,  $J = 5.2$  Hz, 2H), 2.36 (s, 3H).  $^{13}\text{C}$  NMR (101 MHz,  $\text{CDCl}_3$ )  $\delta$  188.38, 167.18, 141.16, 137.56, 135.58, 129.49, 128.99, 128.53, 127.87, 127.18, 93.78, 61.84, 47.09, 21.49. MS (EI, m/z): 281  $[\text{M}]^+$ .

**(41) 4-isobutyl-2-phenyl-4,5-dihydrooxazole (9da)**

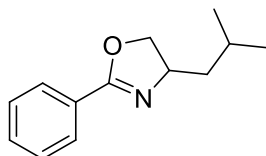

Yellow oil, 86% yield;  $^1\text{H}$  NMR (400 MHz,  $\text{CDCl}_3$ )  $\delta$  7.92-7.83 (m, 2H), 7.42-7.37 (m, 1H), 7.36-7.29 (m, 2H), 4.46-4.41 (m, 1H), 4.31-4.22 (m, 1H), 3.92 (t,  $J = 8.0$  Hz, 1H), 1.77-1.73 (m, 1H), 1.69-1.62 (m, 1H), 1.35-1.29 (m, 1H), 0.91 (t,  $J = 6.0$  Hz, 6H).  $^{13}\text{C}$  NMR (101 MHz,  $\text{CDCl}_3$ )  $\delta$  163.31, 131.19, 128.30, 128.22, 127.95, 73.13, 65.14, 45.61, 25.51, 22.95, 22.70. MS (EI, m/z): 203  $[\text{M}]^+$ .

## NMR spectra of the obtained compounds

### <sup>1</sup>H-NMR spectrum of 3aa

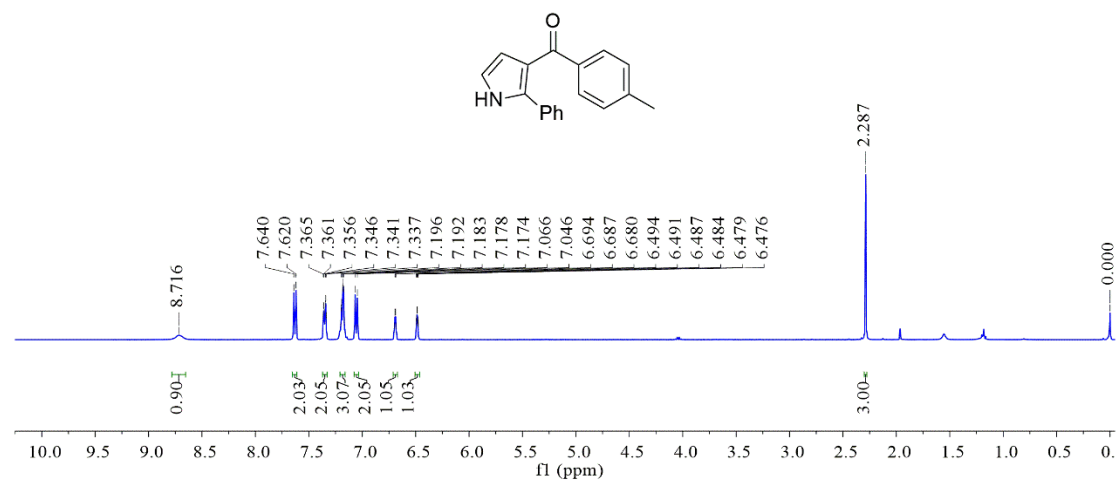

### <sup>13</sup>C-NMR spectrum of 3aa

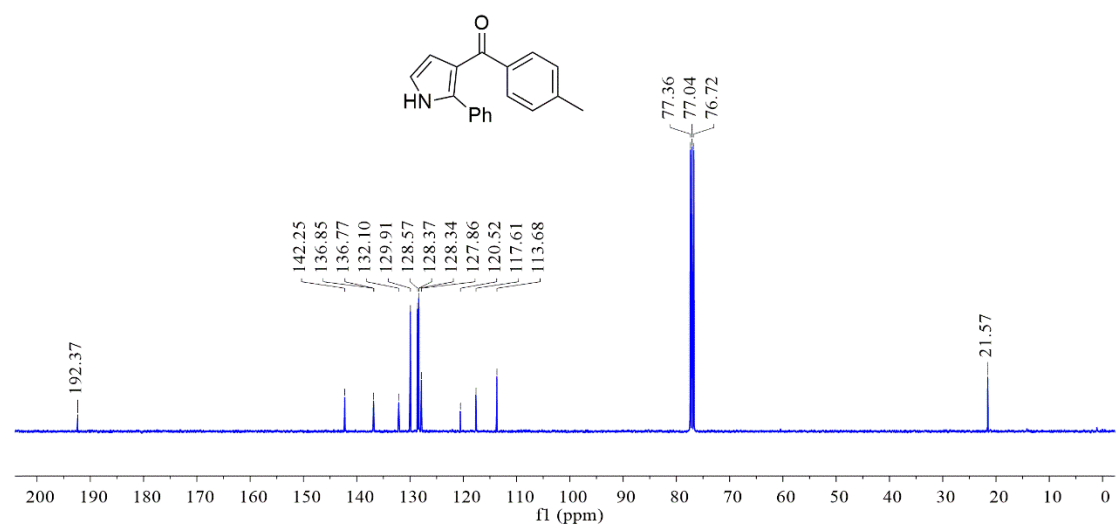

### <sup>1</sup>H-NMR spectrum of 3ab

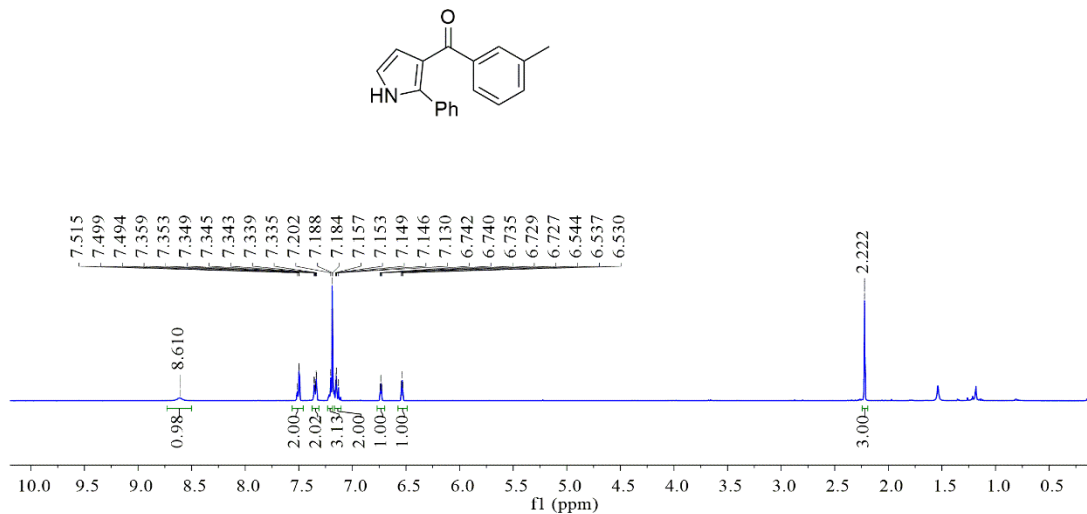

### <sup>13</sup>C-NMR spectrum of 3ab

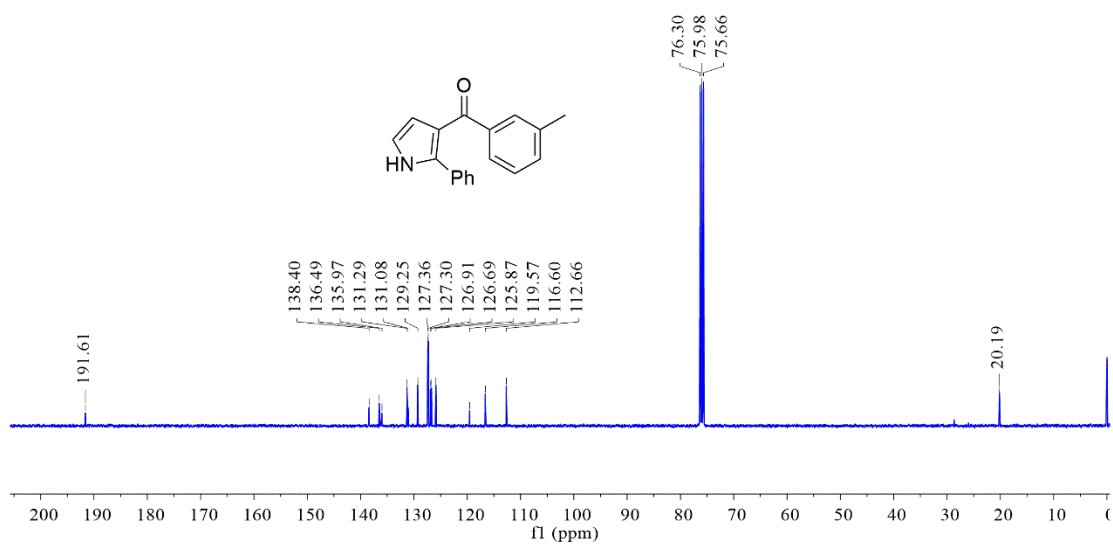



### <sup>1</sup>H-NMR spectrum of 3ac

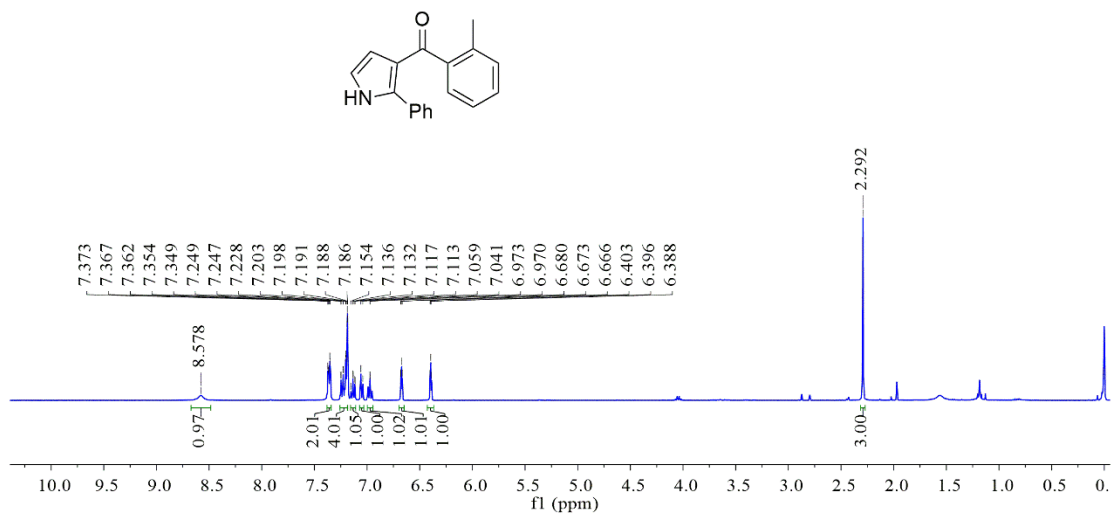

### <sup>13</sup>C-NMR spectrum of 3ac

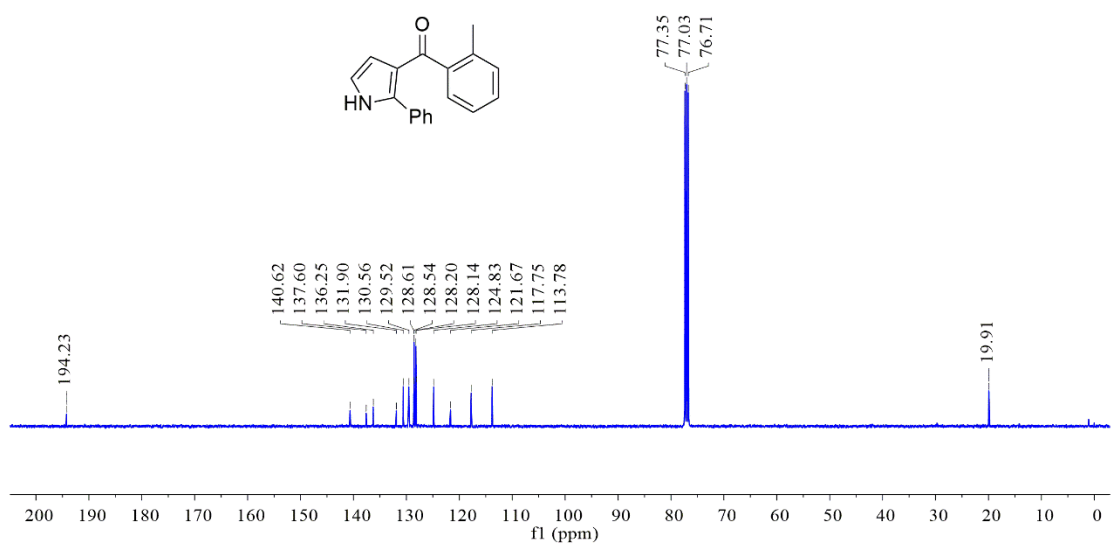

### <sup>1</sup>H-NMR spectrum of 3ad

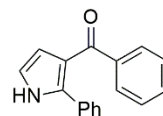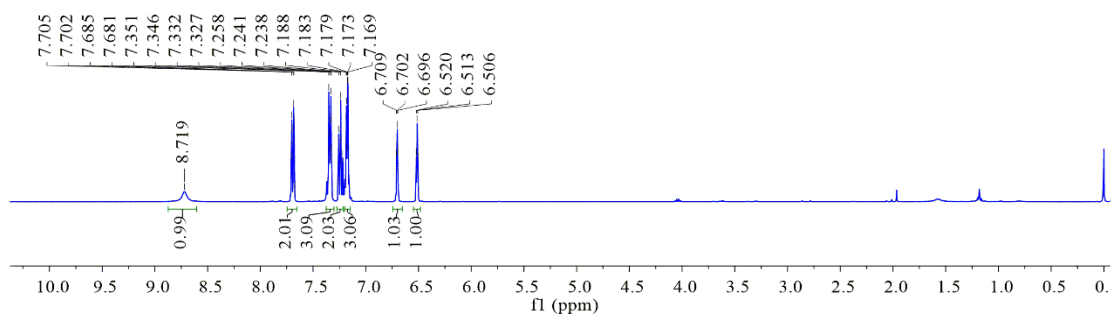

### <sup>13</sup>C-NMR spectrum of 3ad

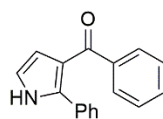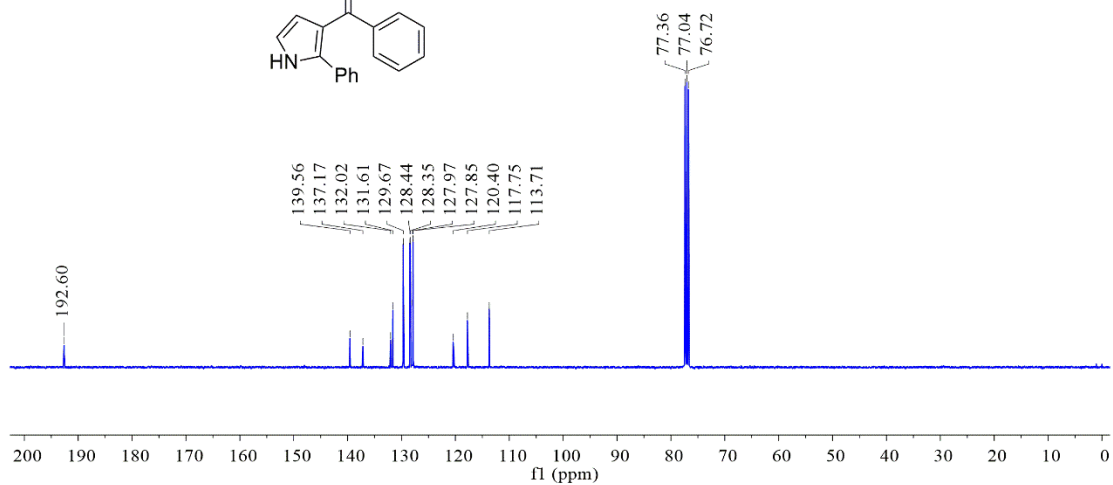

### <sup>1</sup>H-NMR spectrum of 3ae

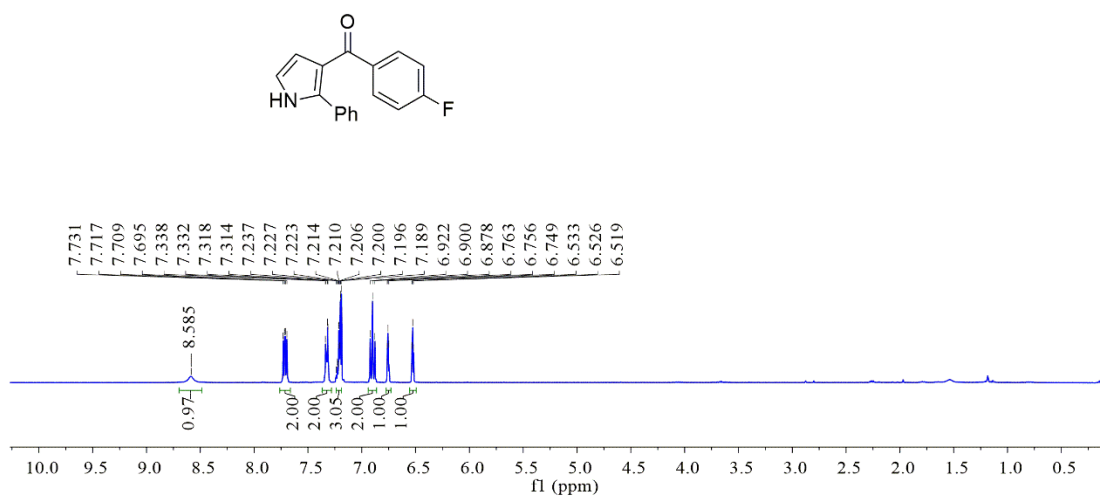

### <sup>13</sup>C-NMR spectrum of 3ae

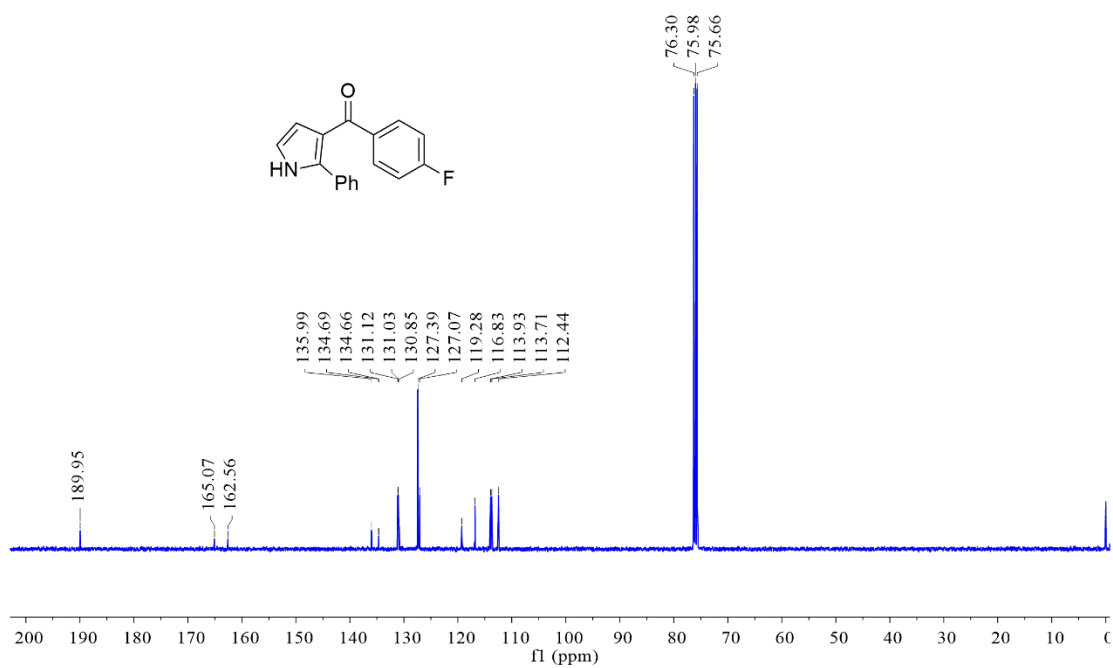

### <sup>1</sup>H-NMR spectrum of 3af

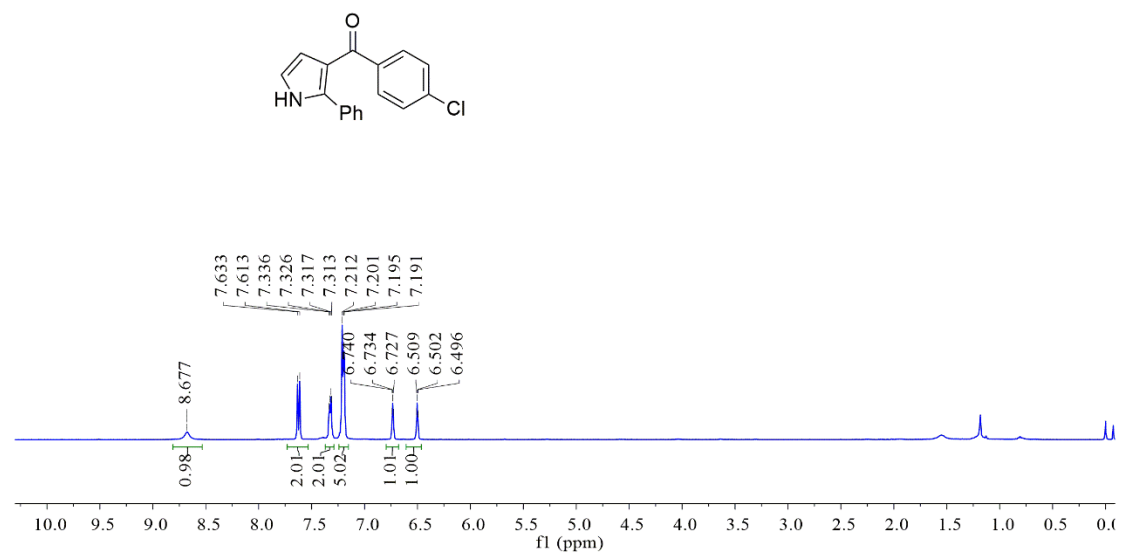

### <sup>13</sup>C-NMR spectrum of 3af

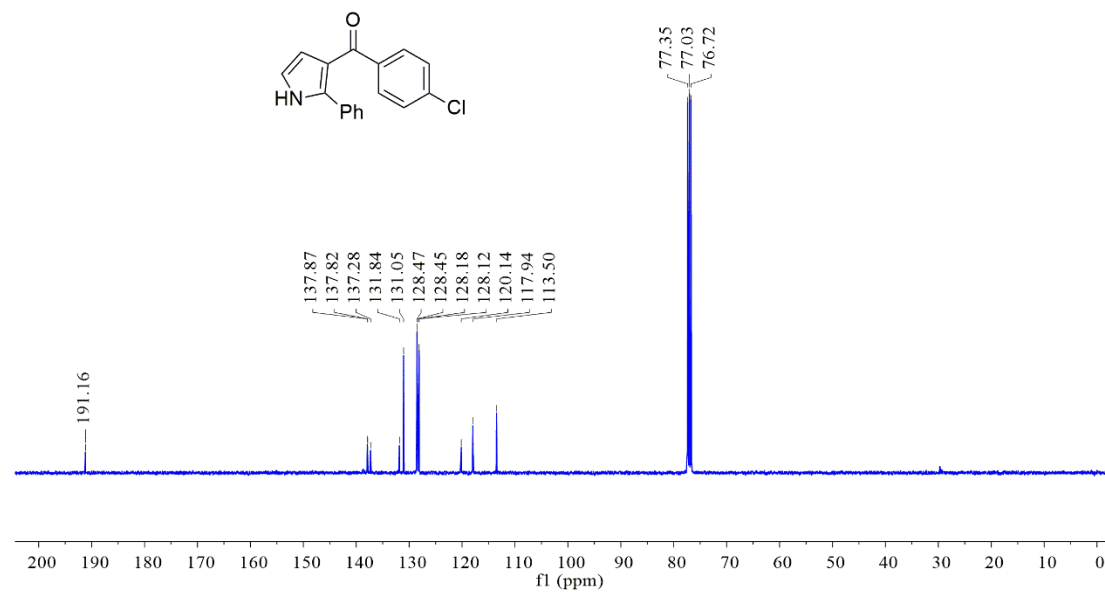

### <sup>1</sup>H-NMR spectrum of 3ag

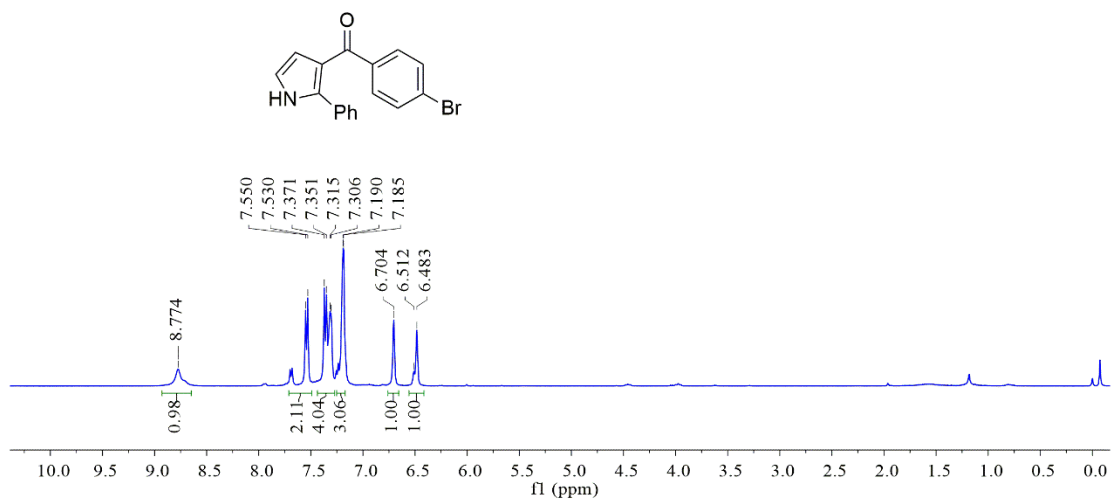

### <sup>13</sup>C-NMR spectrum of 3ag

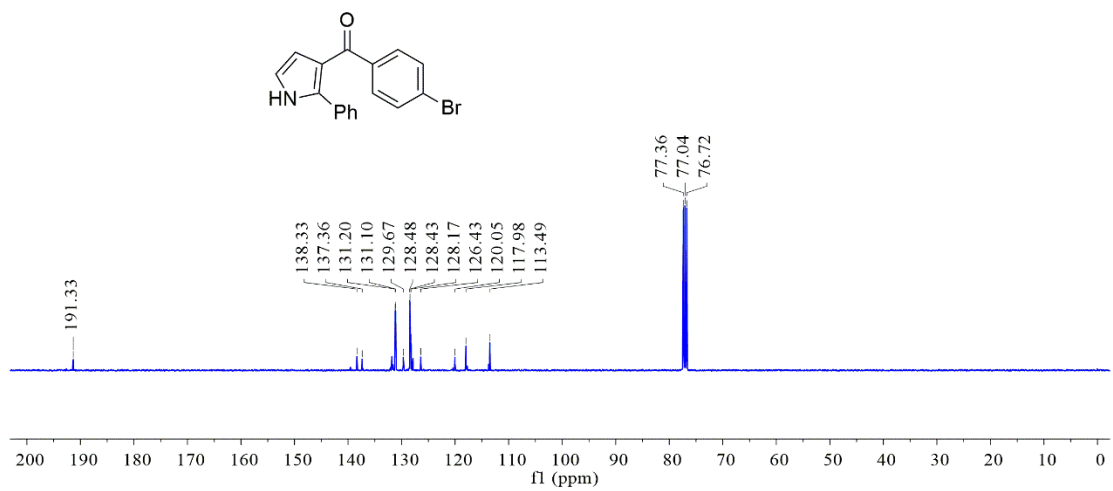

### <sup>1</sup>H-NMR spectrum of 3ah

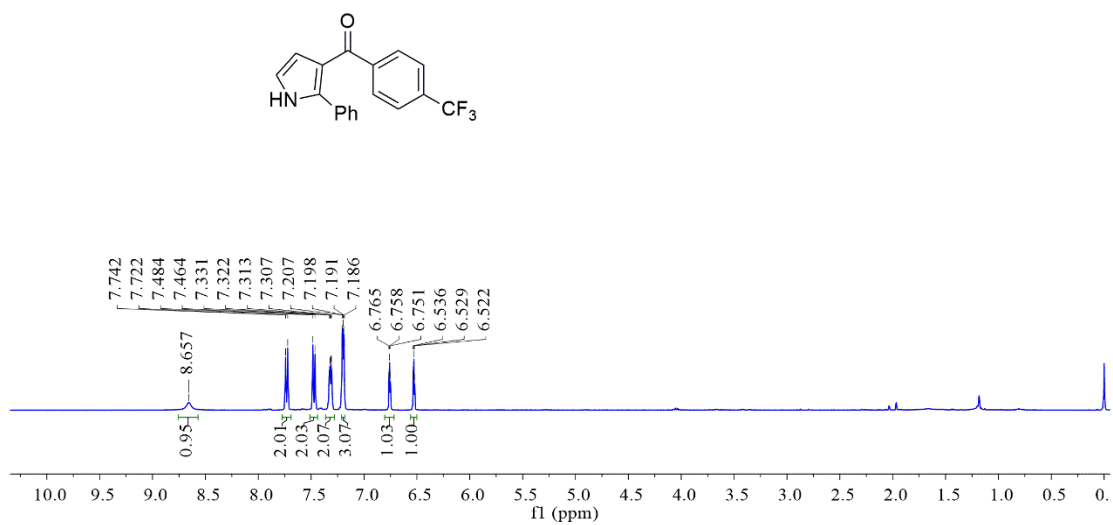

### <sup>13</sup>C-NMR spectrum of 3ah

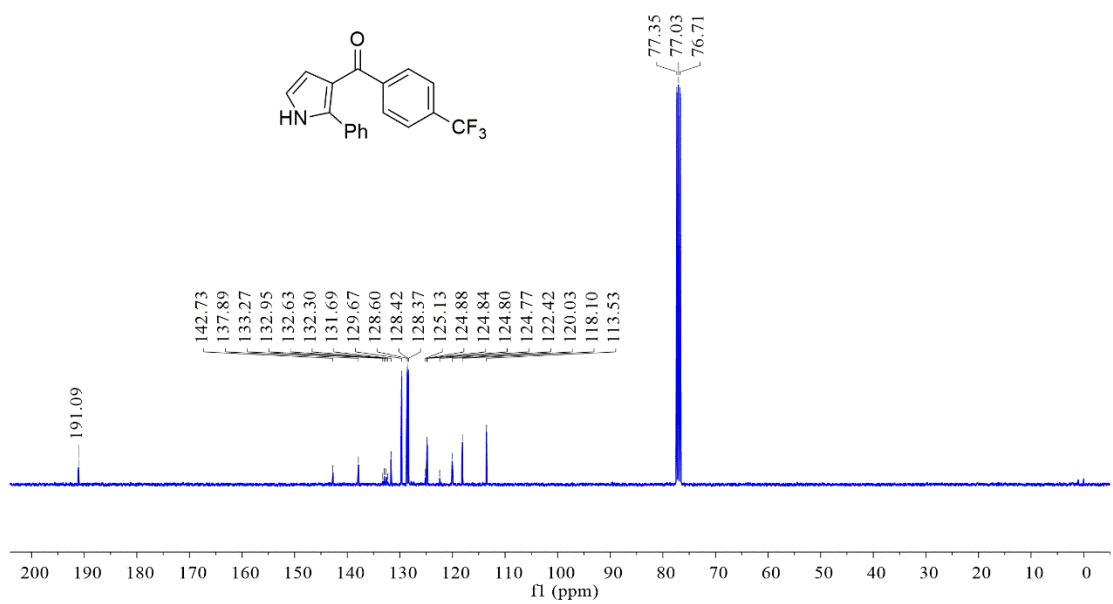

### <sup>1</sup>H-NMR spectrum of 3ai

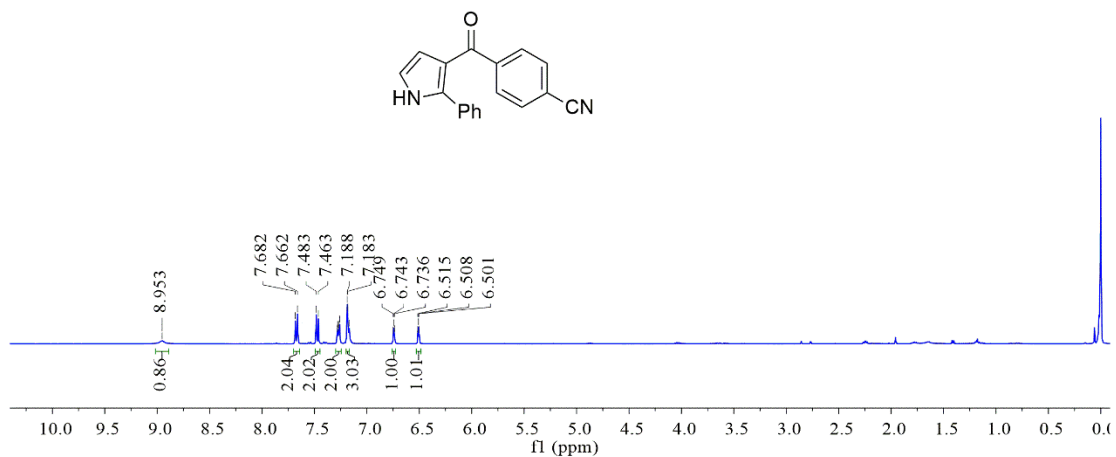

### <sup>13</sup>C-NMR spectrum of 3ai

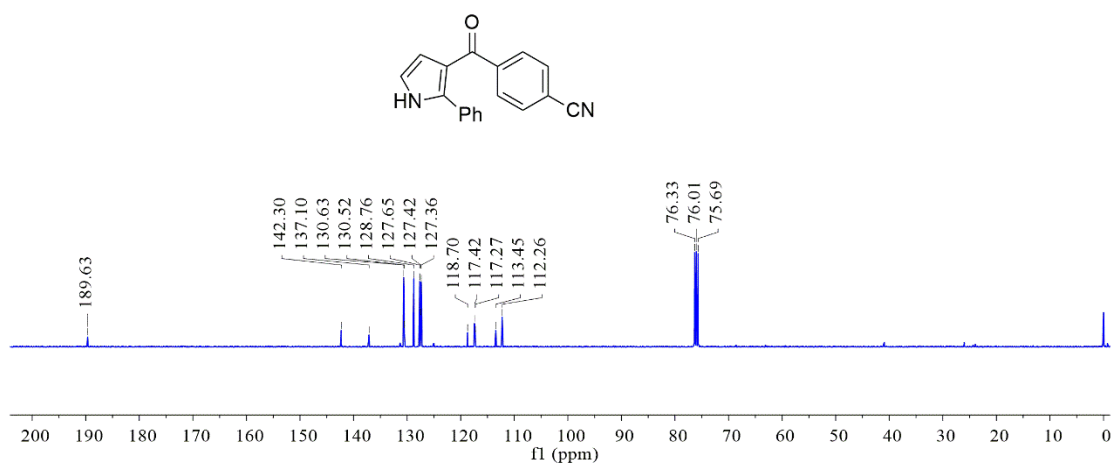

### <sup>1</sup>H-NMR spectrum of 3aj

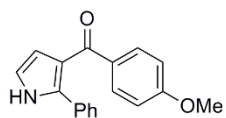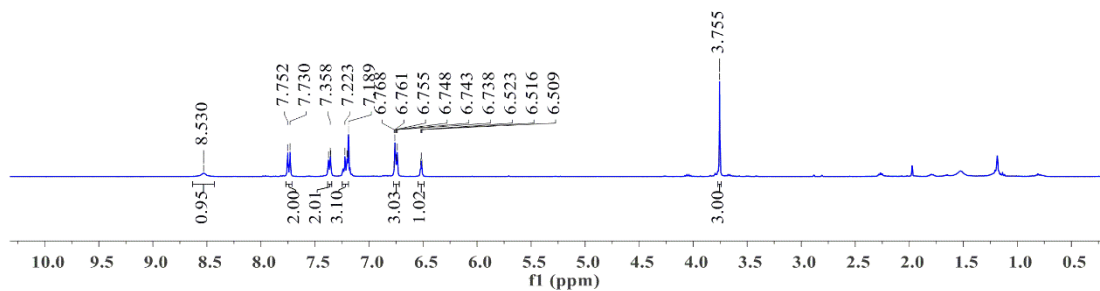

### <sup>13</sup>C-NMR spectrum of 3aj

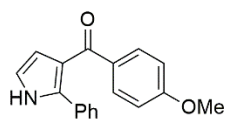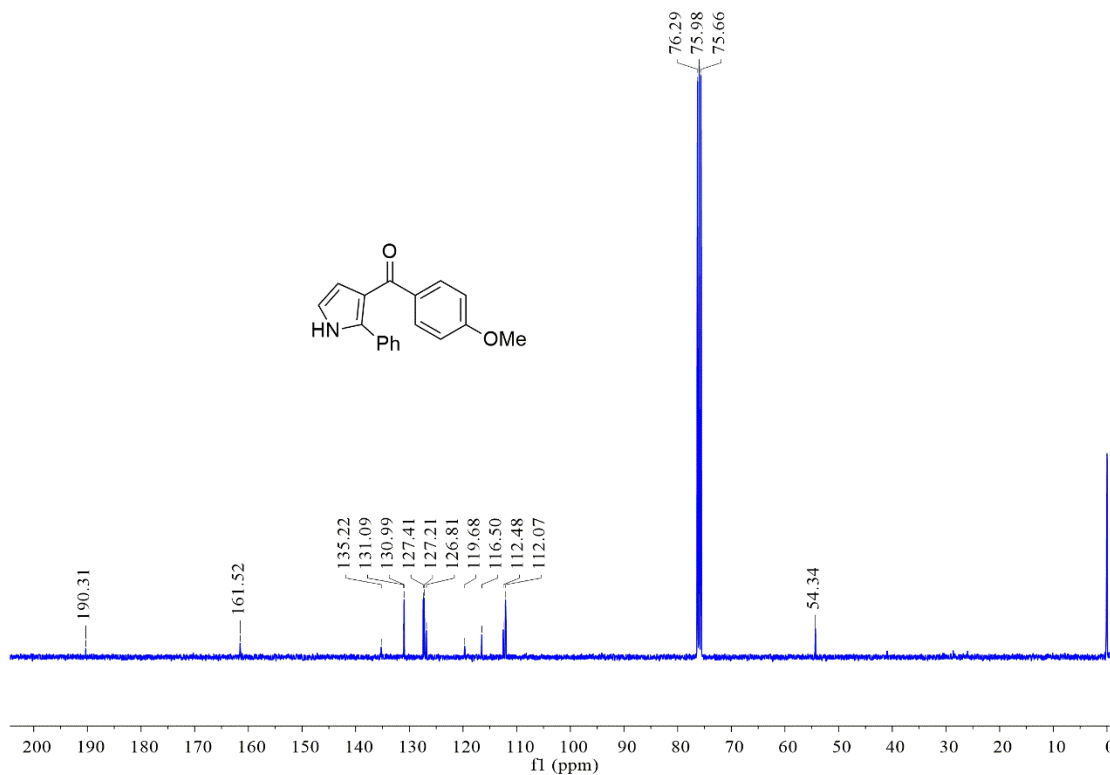



### <sup>1</sup>H-NMR spectrum of 3ak

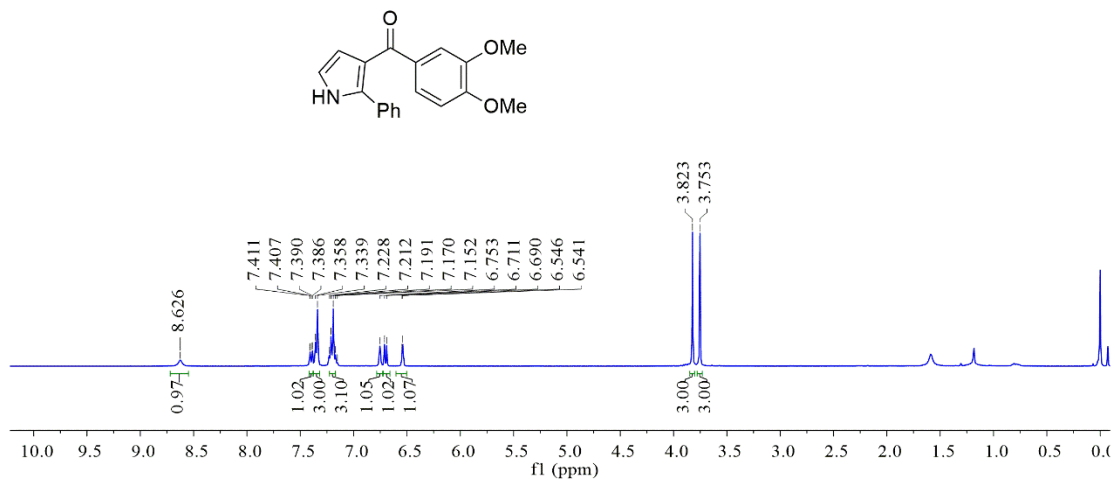

### <sup>13</sup>C-NMR spectrum of 3ak

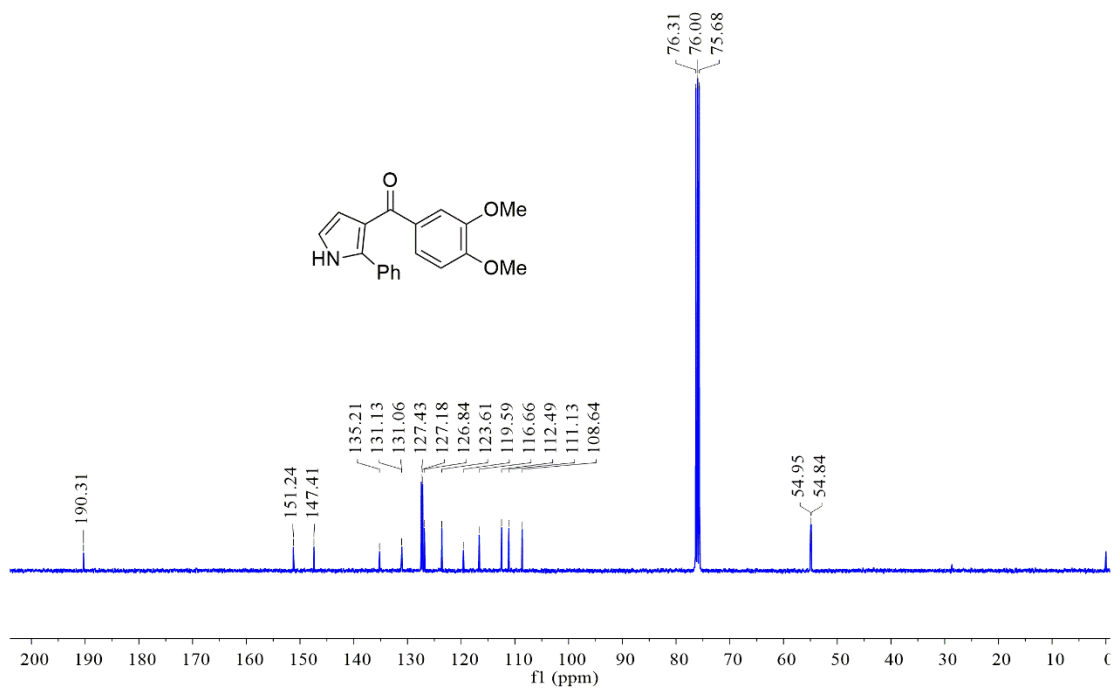

### <sup>1</sup>H-NMR spectrum of 3a

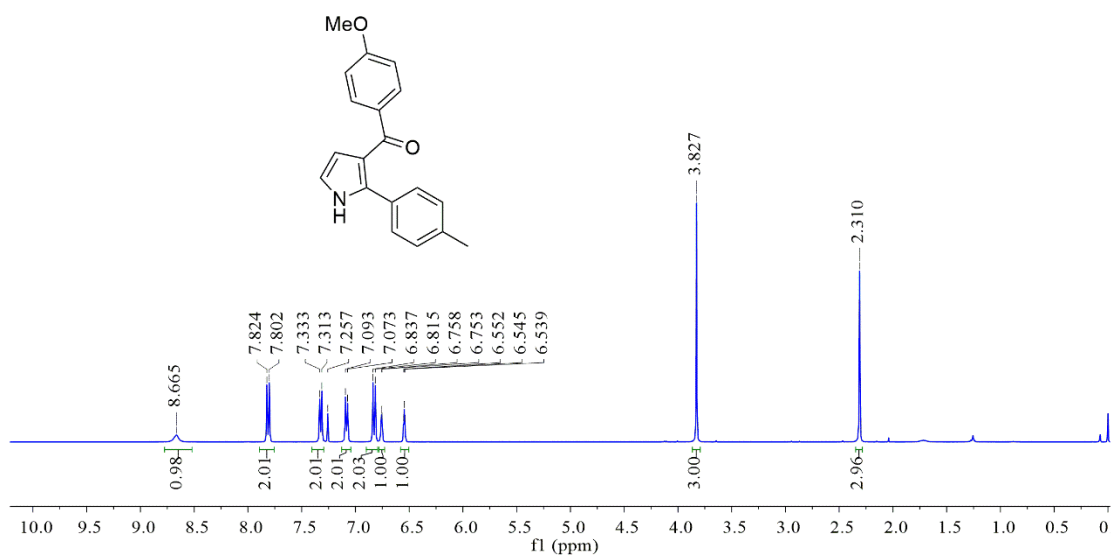

### <sup>13</sup>C-NMR spectrum of 3a

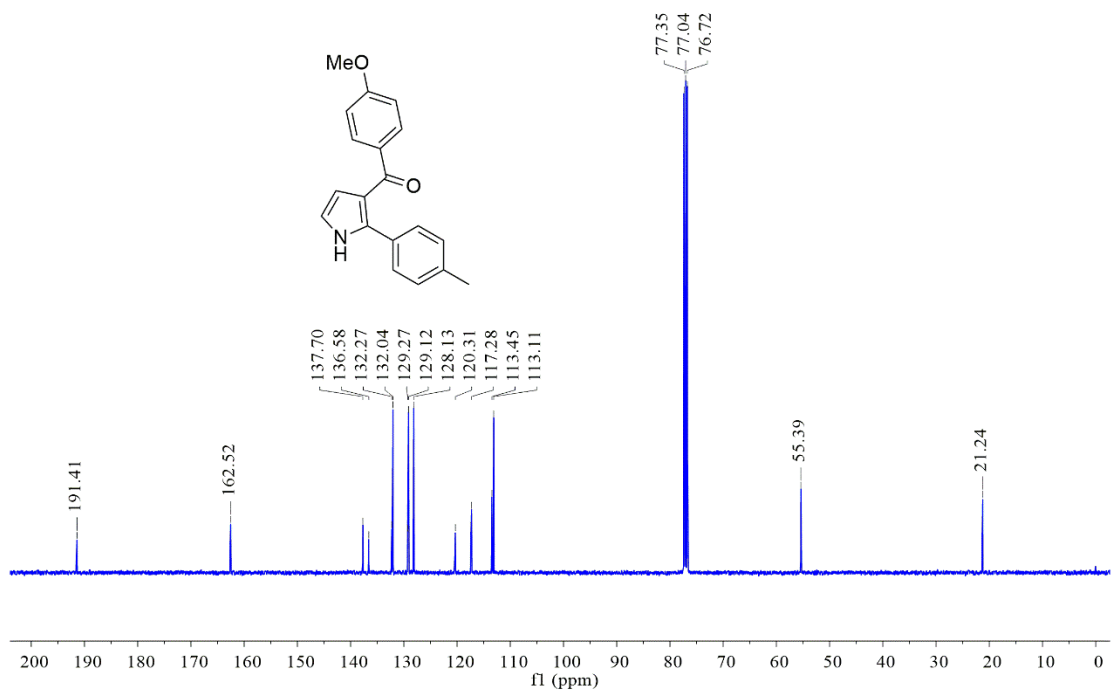

### <sup>1</sup>H-NMR spectrum of 3am

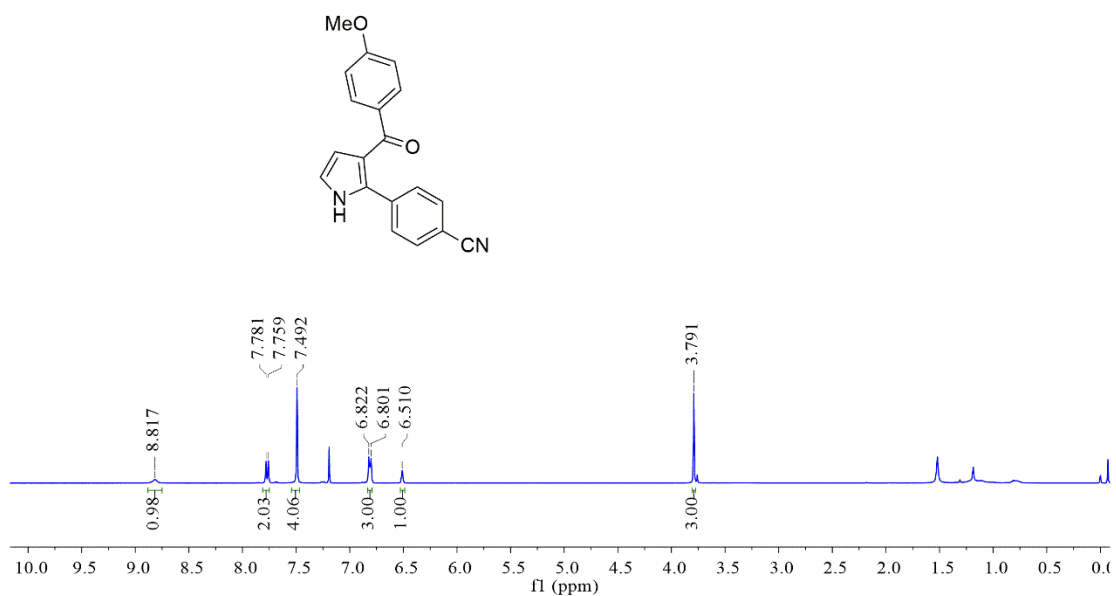

### <sup>13</sup>C-NMR spectrum of 3am

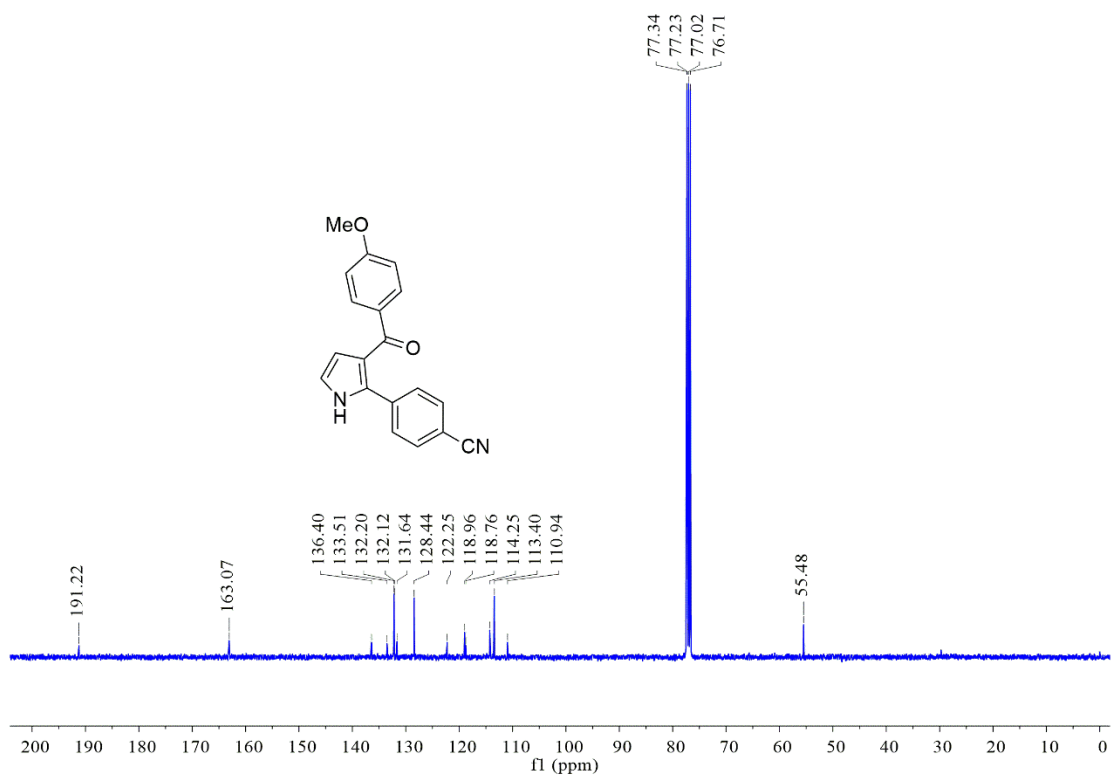

### <sup>1</sup>H-NMR spectrum of 3an

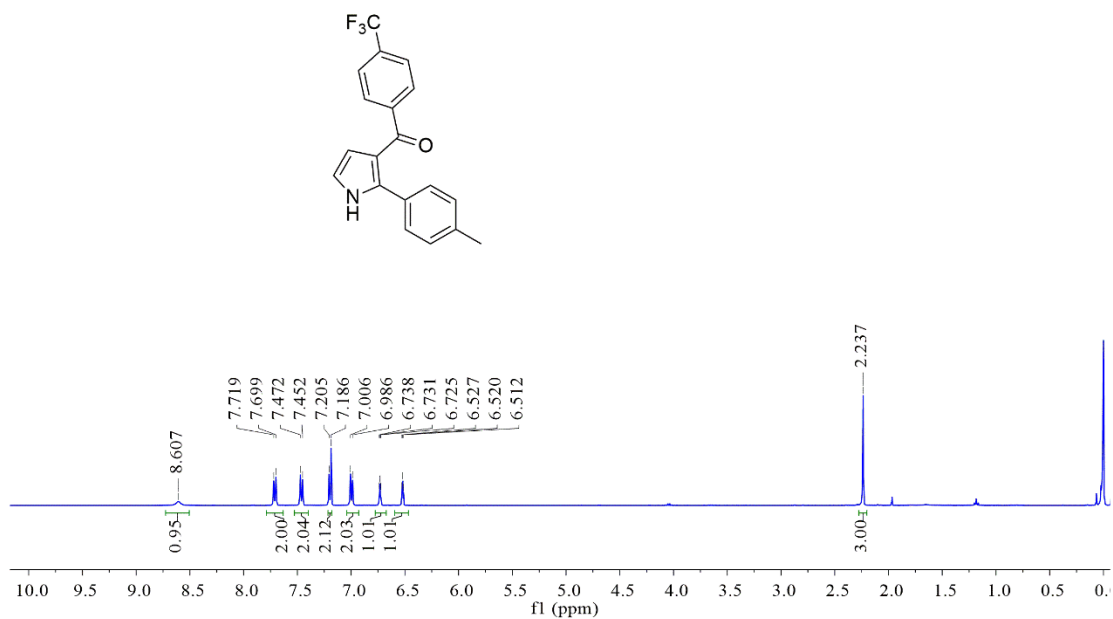

### <sup>13</sup>C-NMR spectrum of 3an

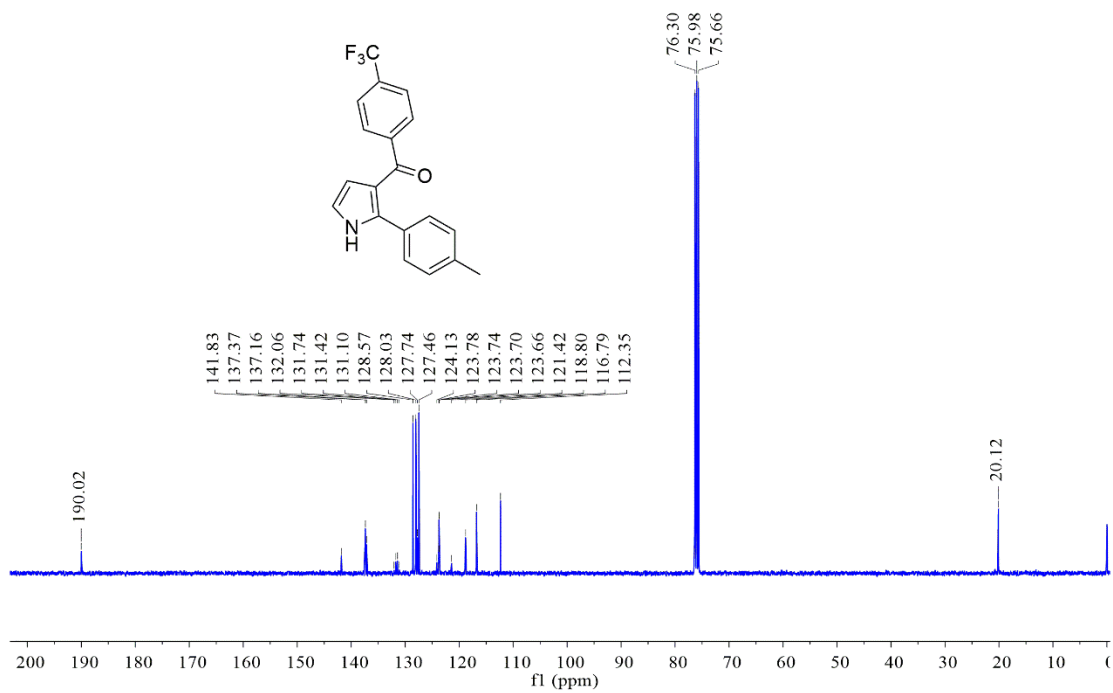

### <sup>1</sup>H-NMR spectrum of 3ao

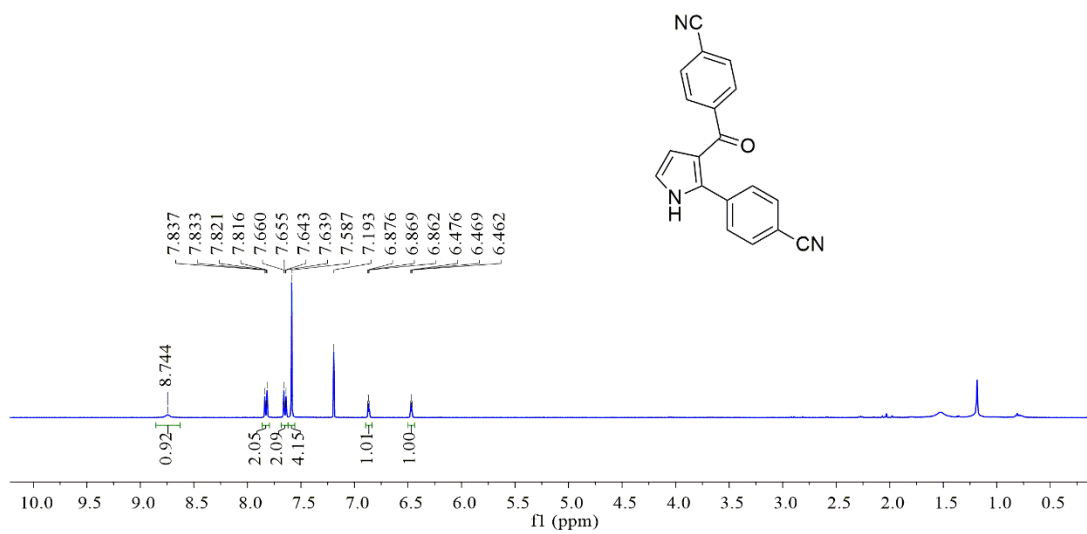

### <sup>13</sup>C-NMR spectrum of 3ao

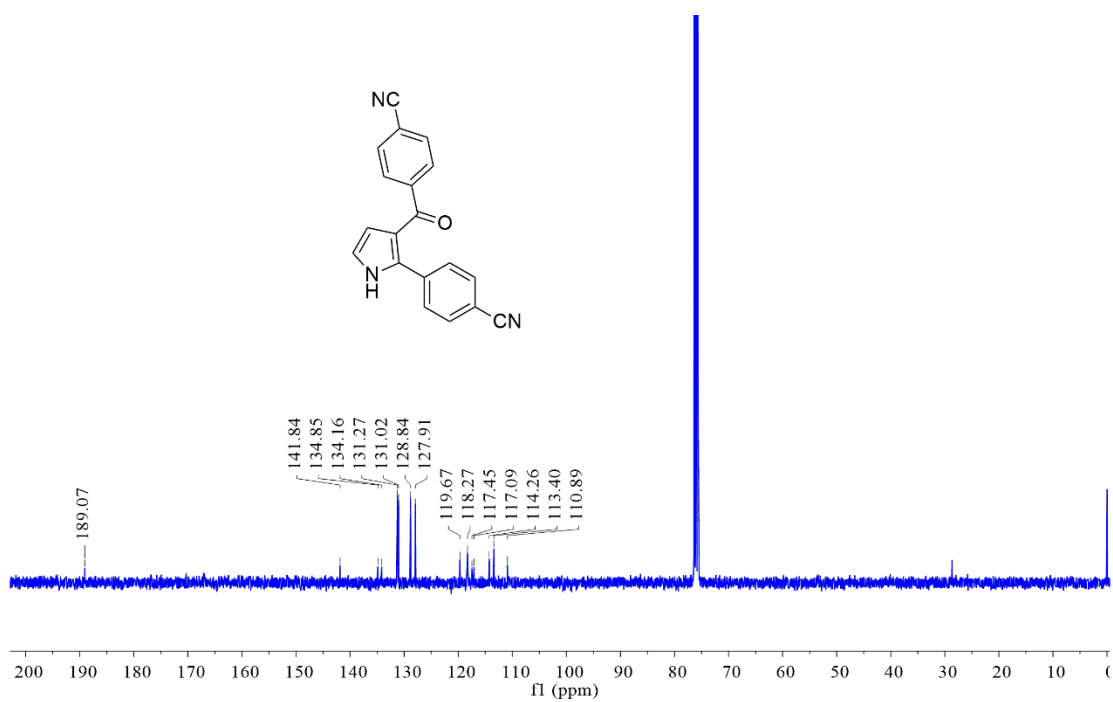

### <sup>1</sup>H-NMR spectrum of 3ap

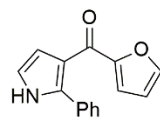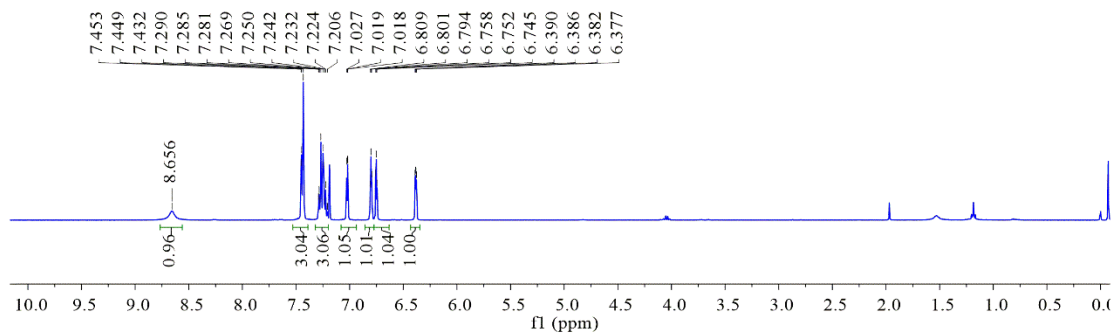

### <sup>13</sup>C-NMR spectrum of 3ap

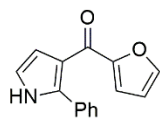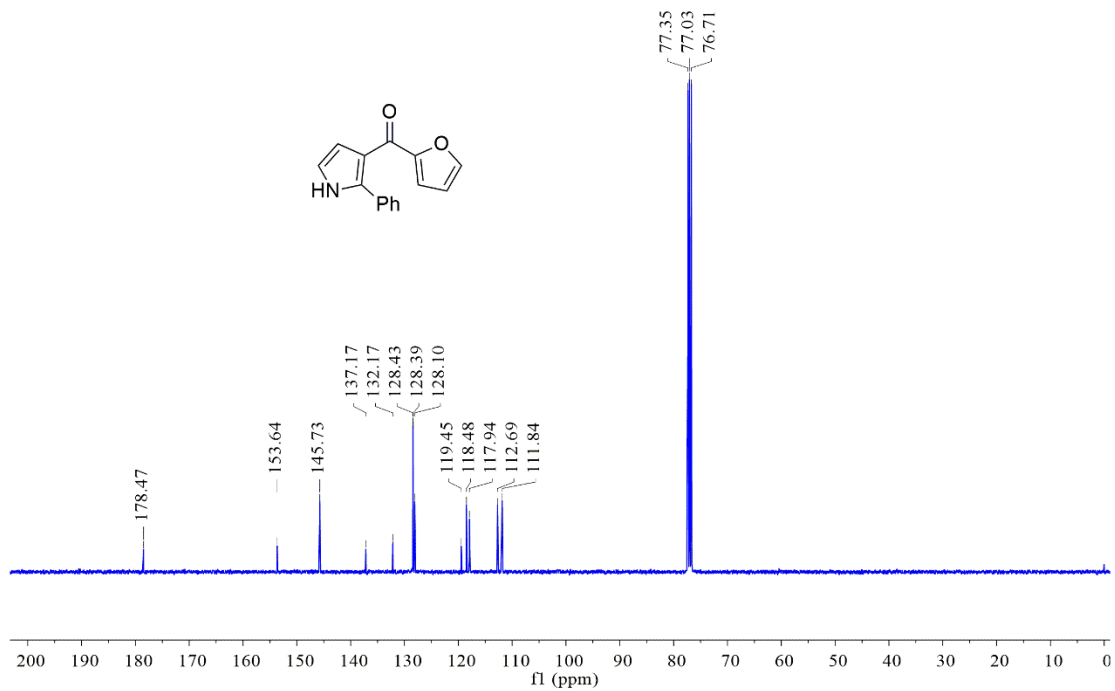

### <sup>1</sup>H-NMR spectrum of 3aq

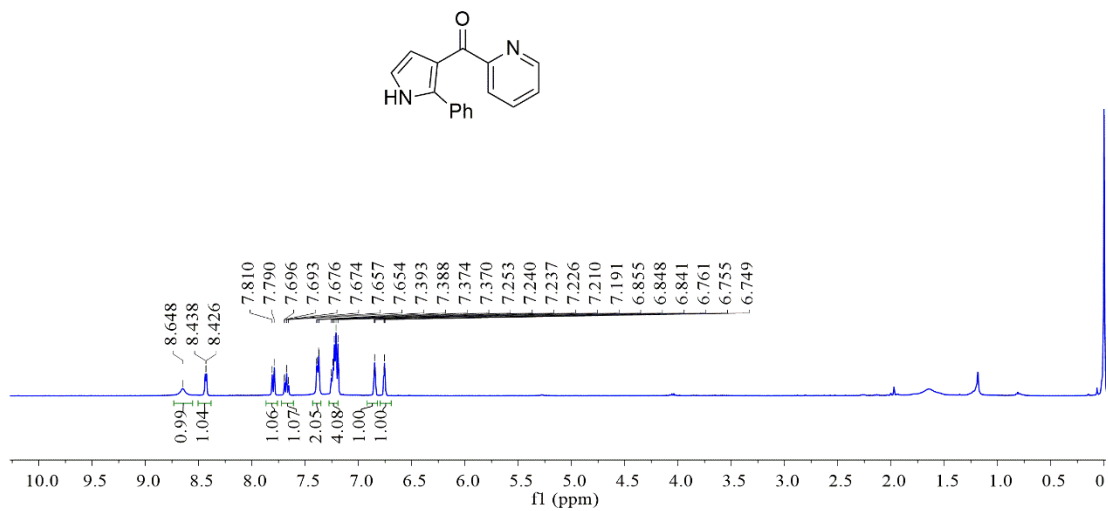

### <sup>13</sup>C-NMR spectrum of 3aq

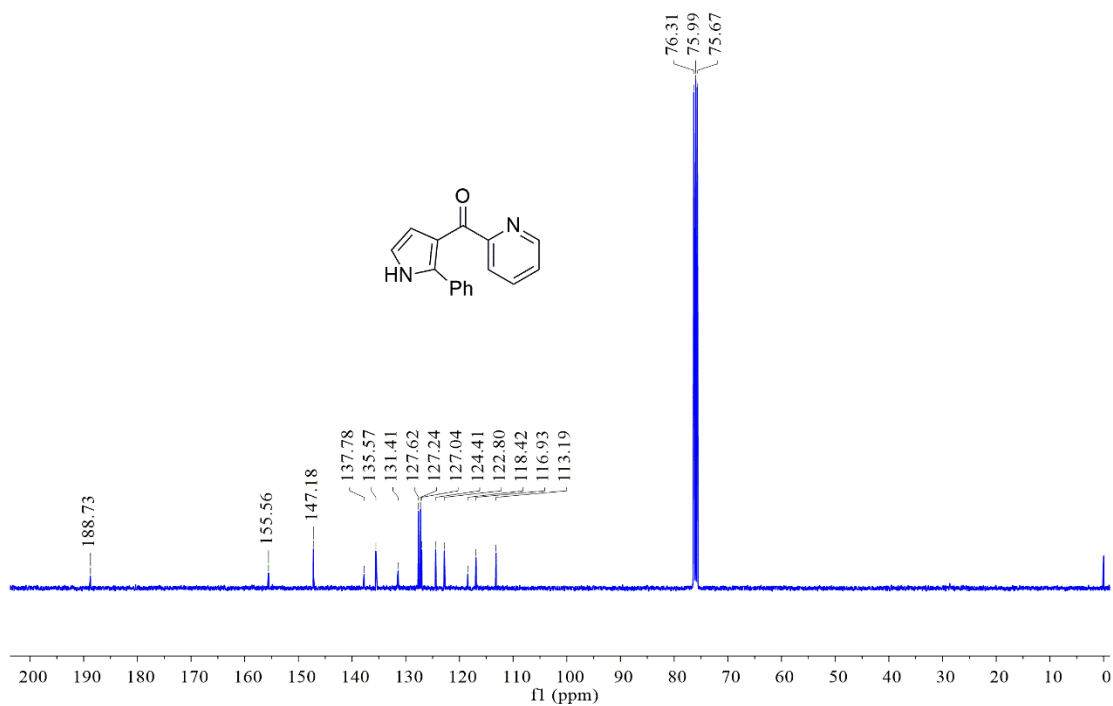

### <sup>1</sup>H-NMR spectrum of 3ar

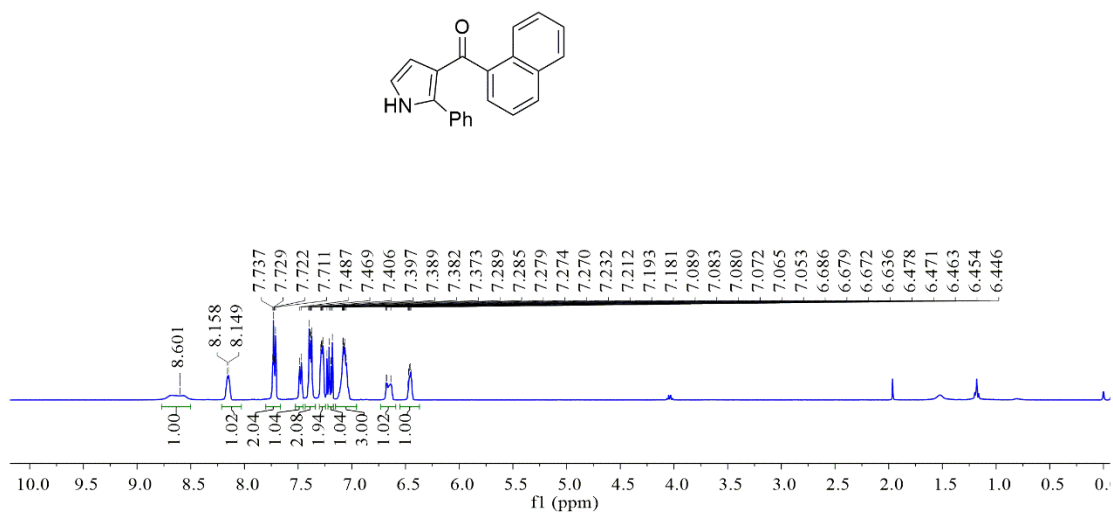

### <sup>13</sup>C-NMR spectrum of 3ar

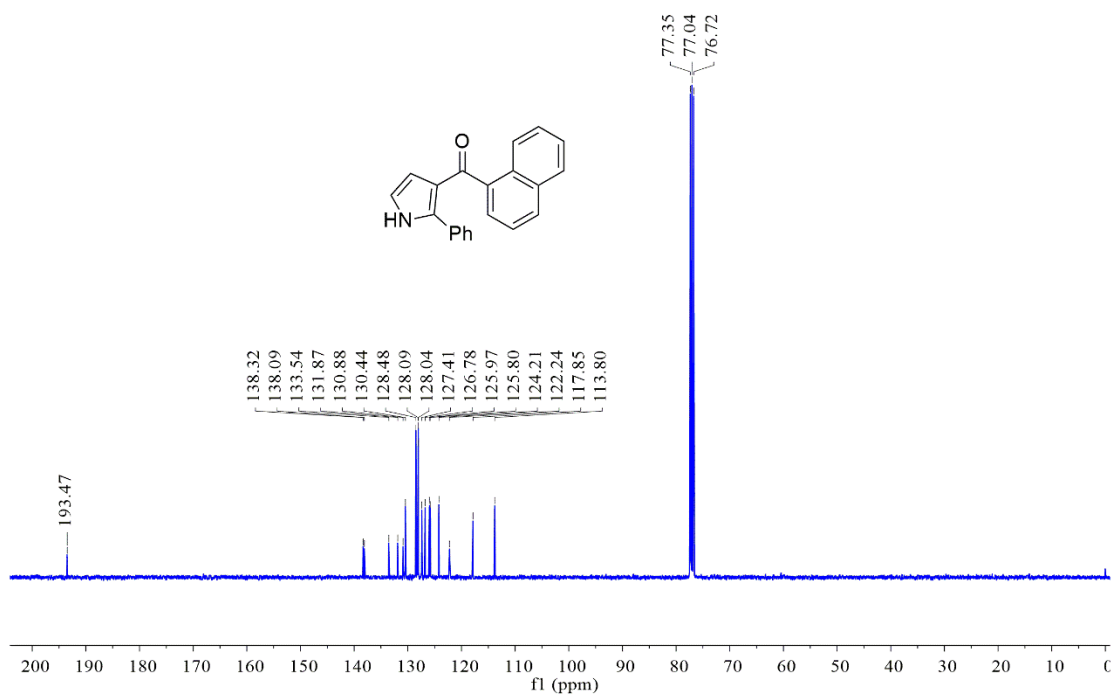



### <sup>1</sup>H-NMR spectrum of 3as

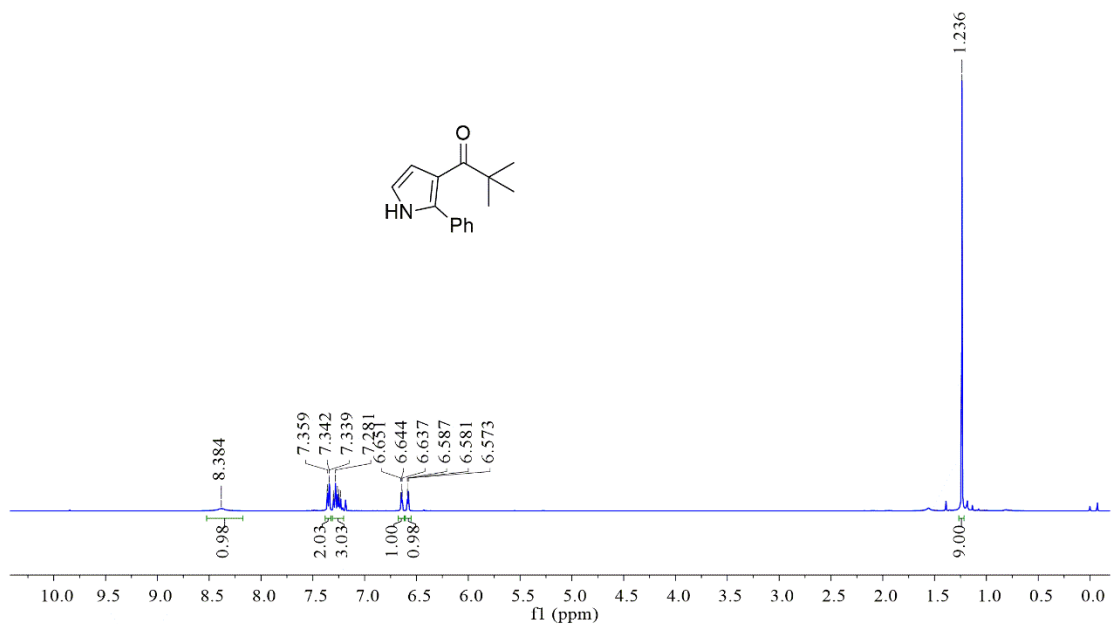

### <sup>13</sup>C-NMR spectrum of 3as

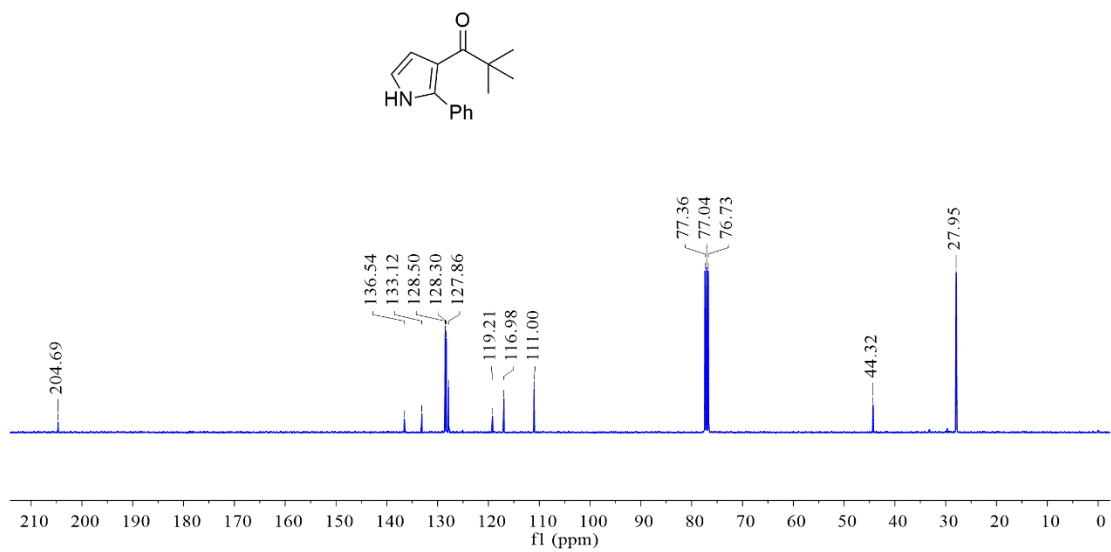

### <sup>1</sup>H-NMR spectrum of 3at

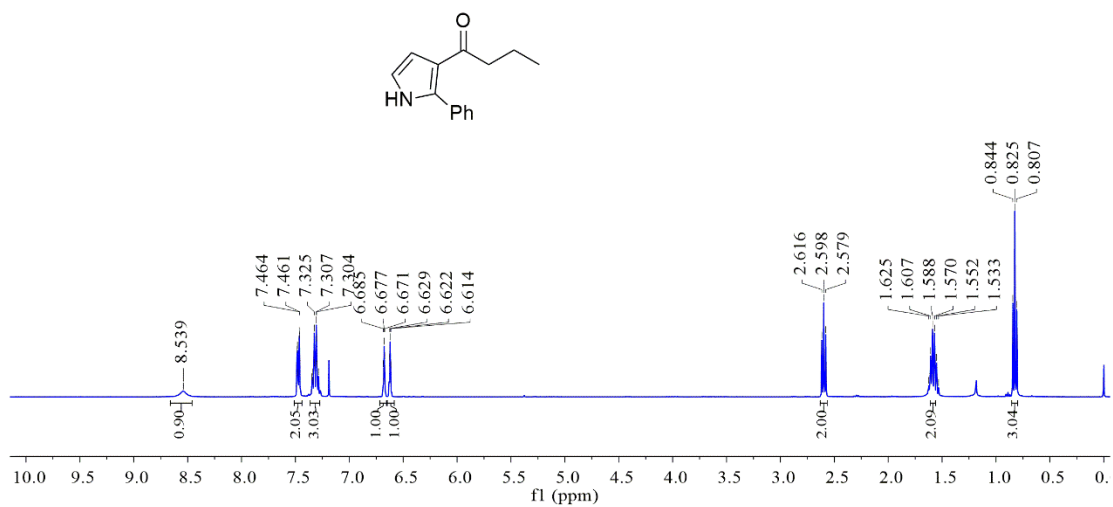

### <sup>13</sup>C-NMR spectrum of 3at

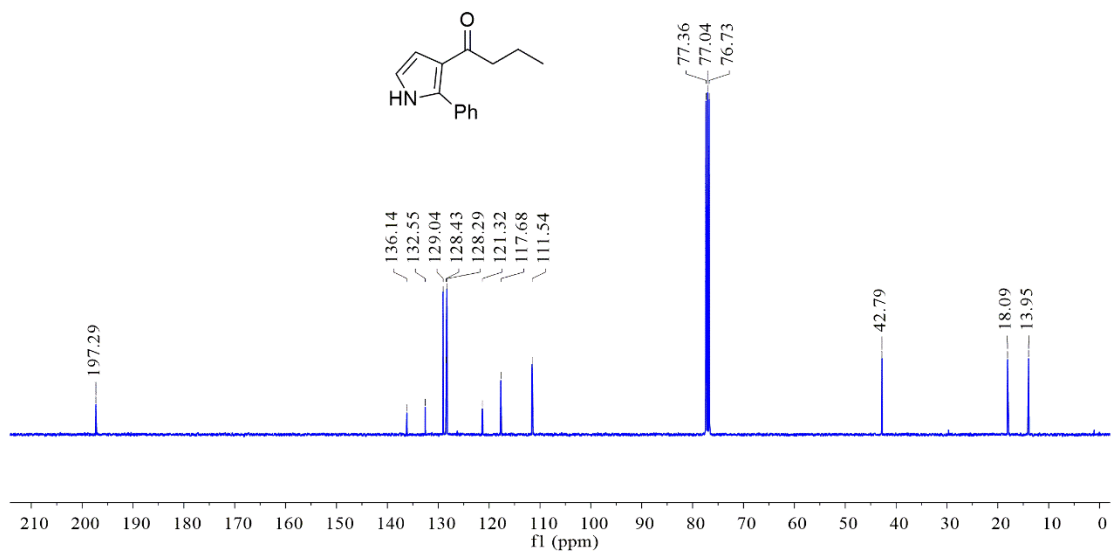

### <sup>1</sup>H-NMR spectrum of 3au

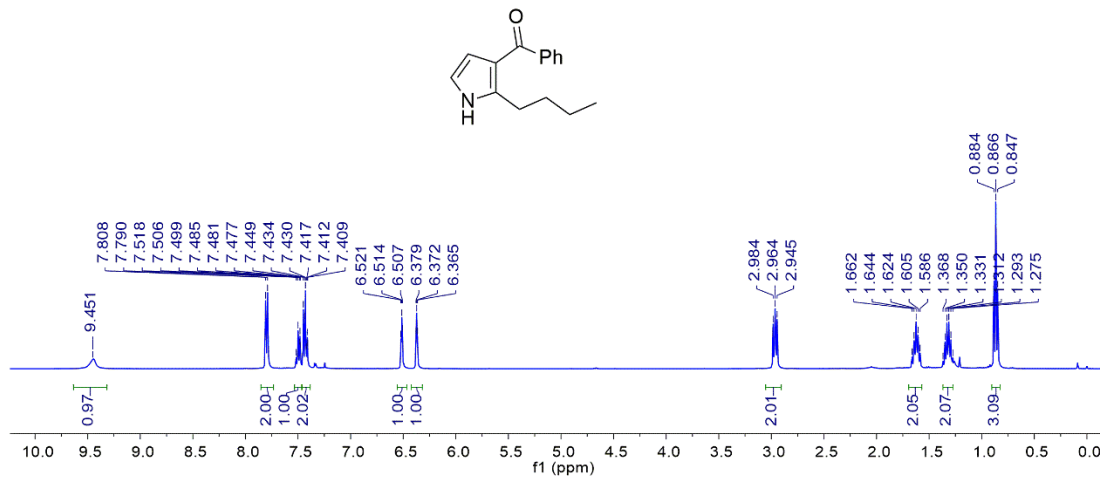

### <sup>13</sup>C-NMR spectrum of 3au

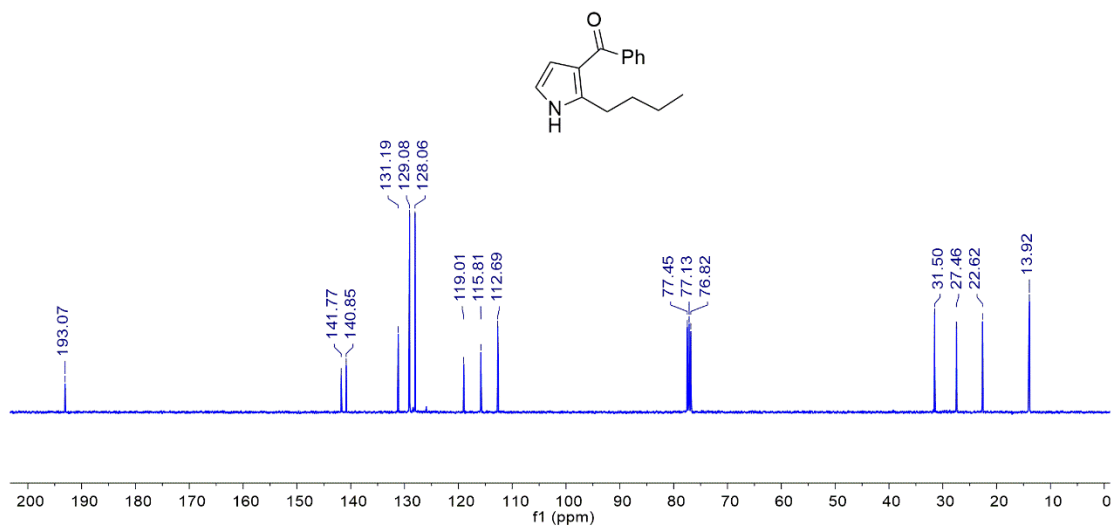

### <sup>1</sup>H-NMR spectrum of 3av

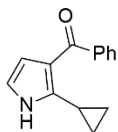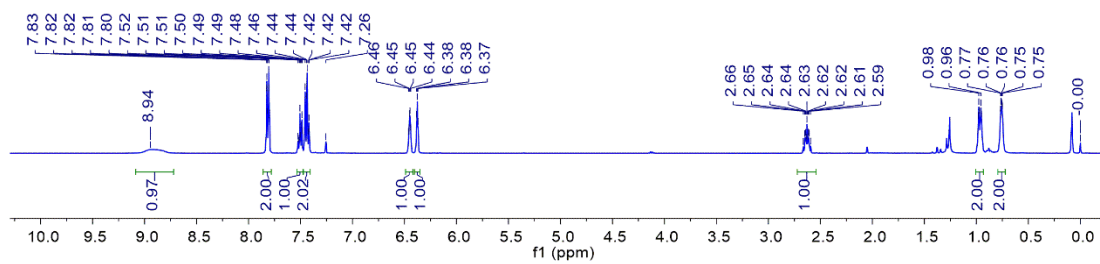

### <sup>13</sup>C-NMR spectrum of 3av

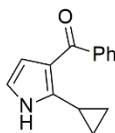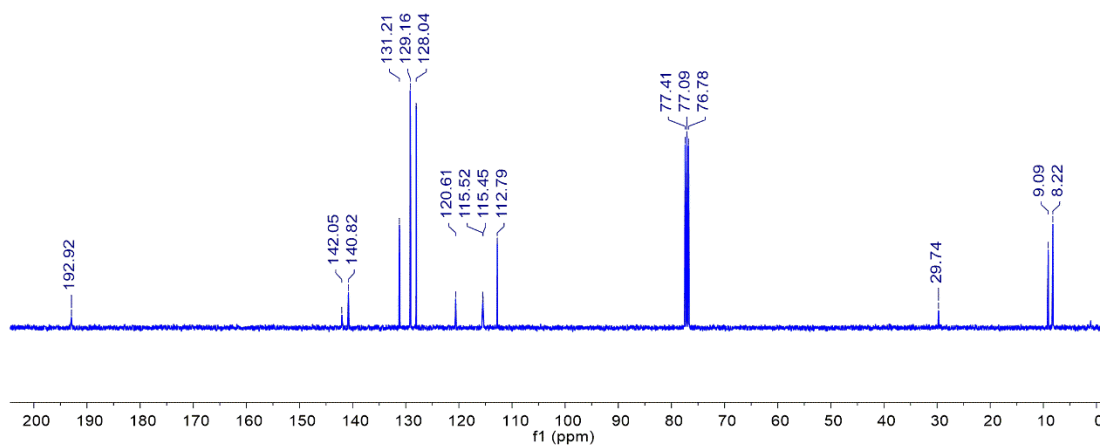

### <sup>1</sup>H-NMR spectrum of 3ba

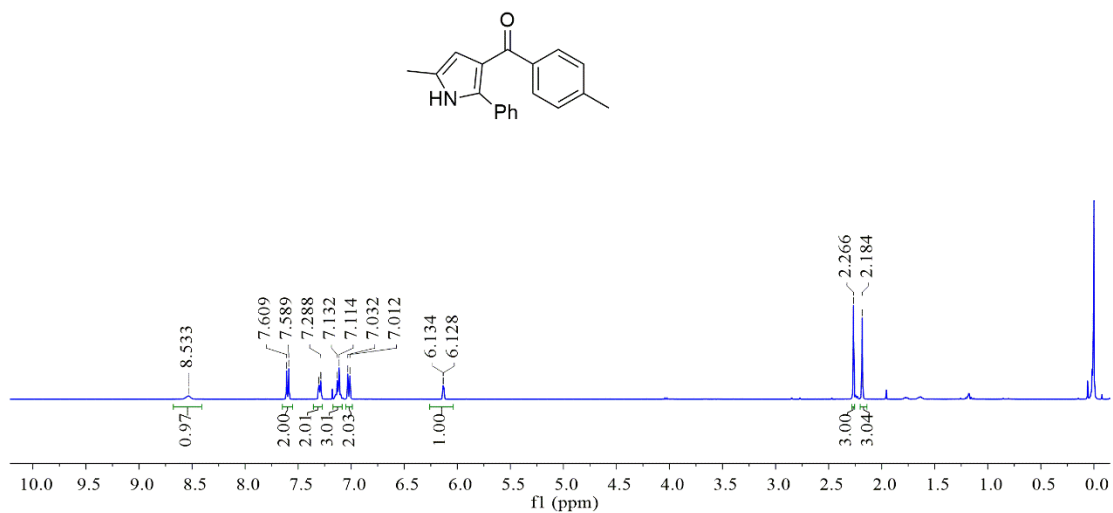

### <sup>13</sup>C-NMR spectrum of 3ba

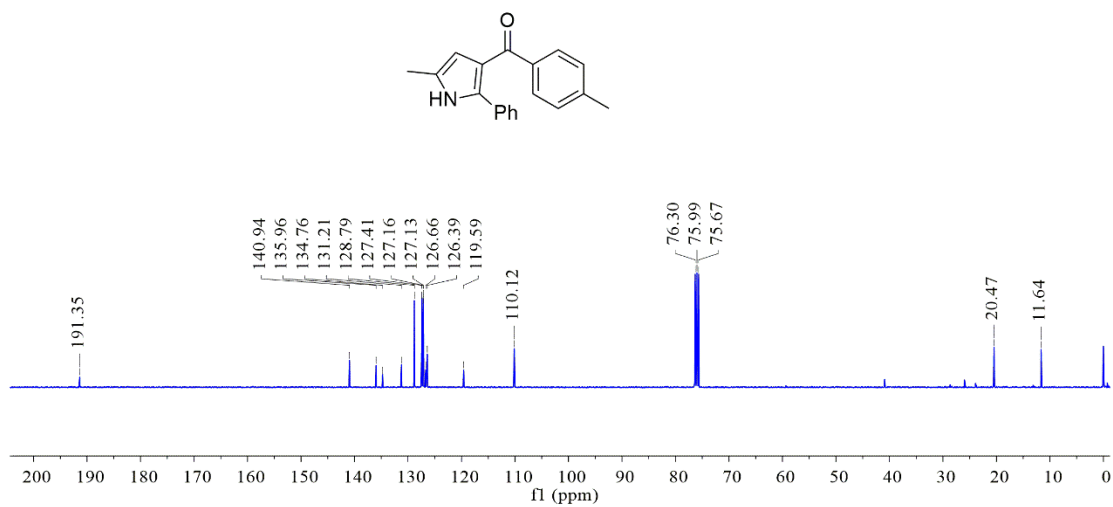

### <sup>1</sup>H-NMR spectrum of 3bf

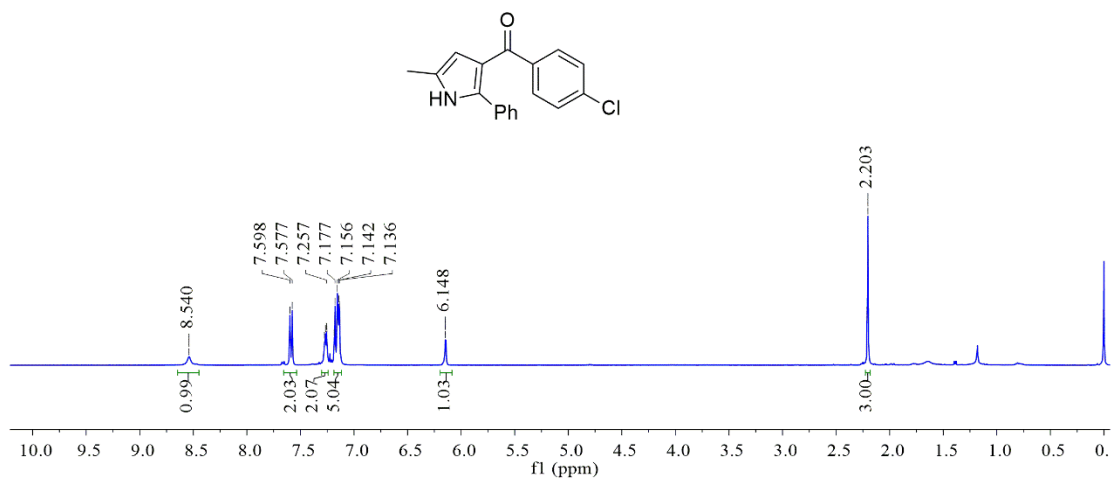

### <sup>13</sup>C-NMR spectrum of 3bf

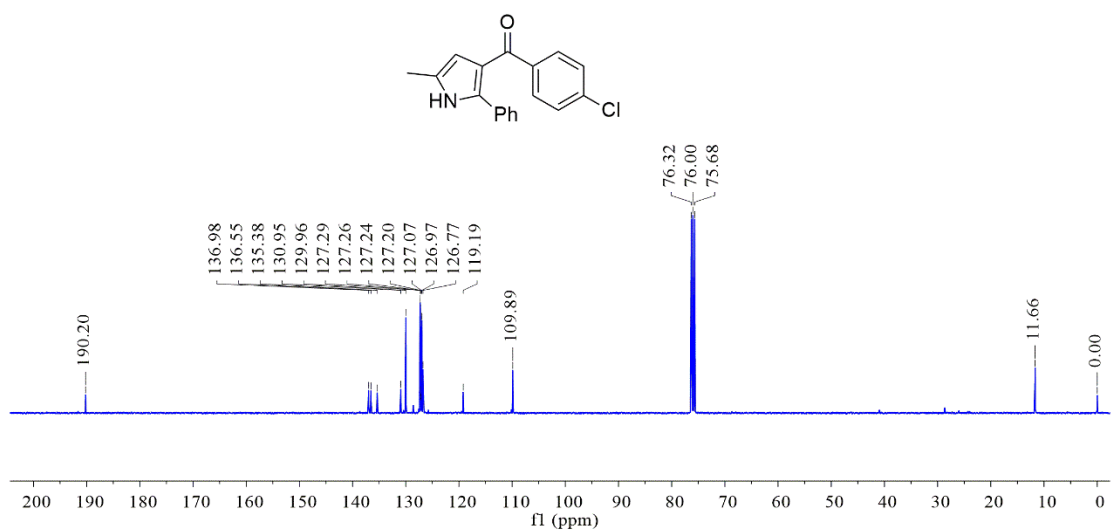

### <sup>1</sup>H-NMR spectrum of 3bj

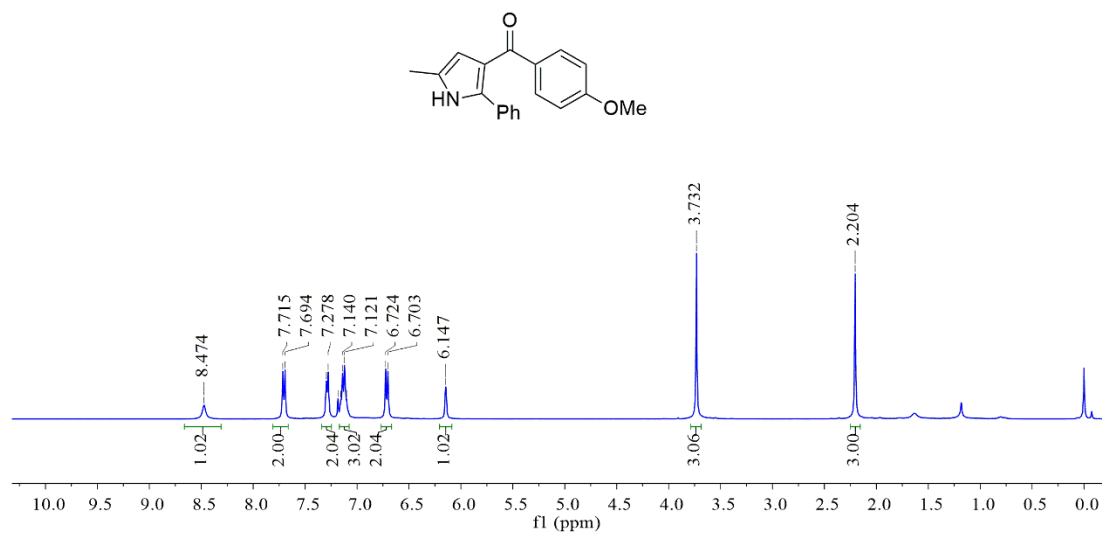

### <sup>13</sup>C-NMR spectrum of 3bj

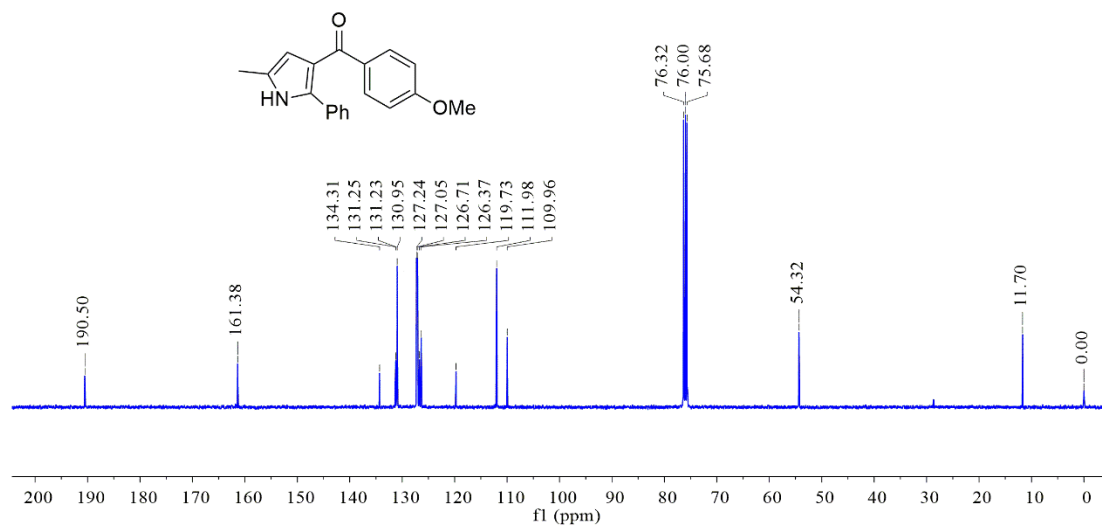

### <sup>1</sup>H-NMR spectrum of 3ca

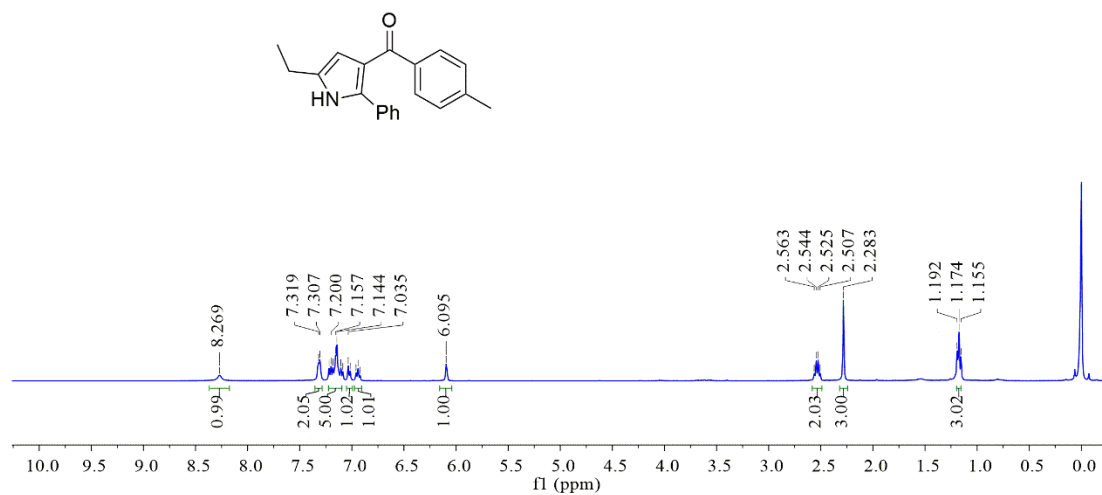

### <sup>13</sup>C-NMR spectrum of 3ca

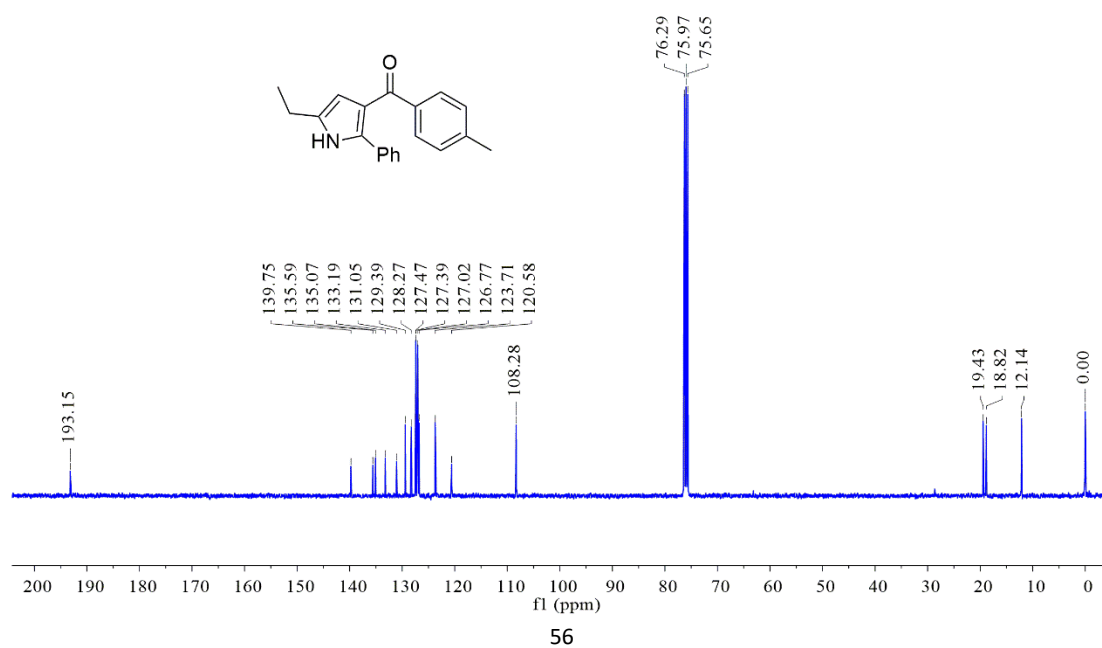



### <sup>1</sup>H-NMR spectrum of 3cd

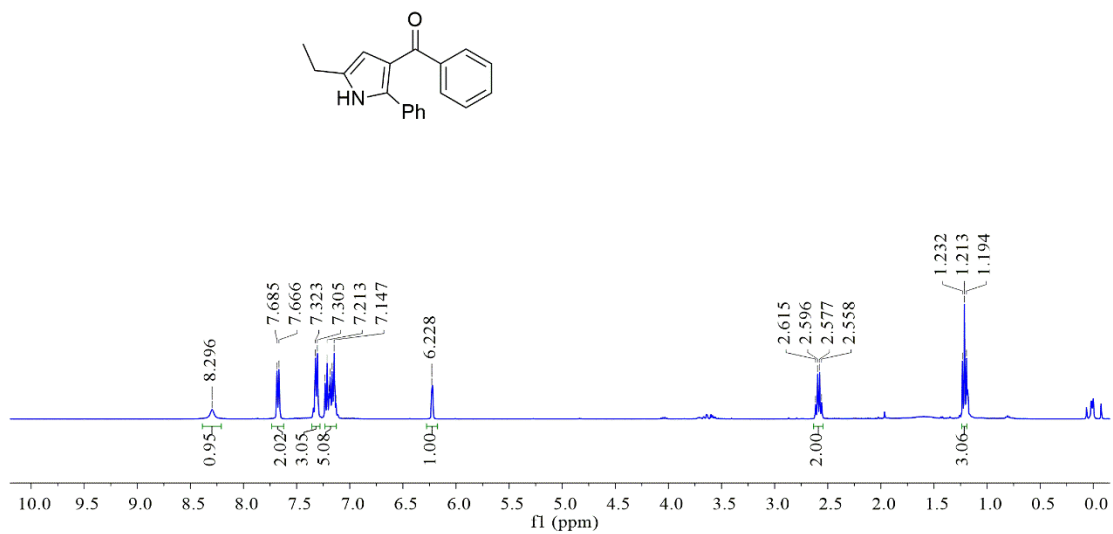

### <sup>13</sup>C-NMR spectrum of 3cd

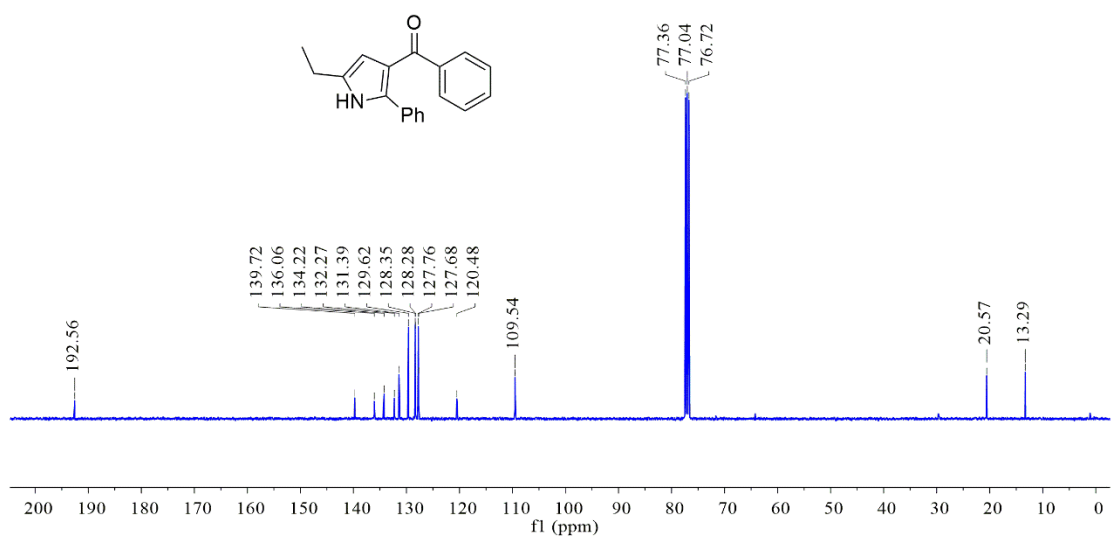

### <sup>1</sup>H-NMR spectrum of 3ch

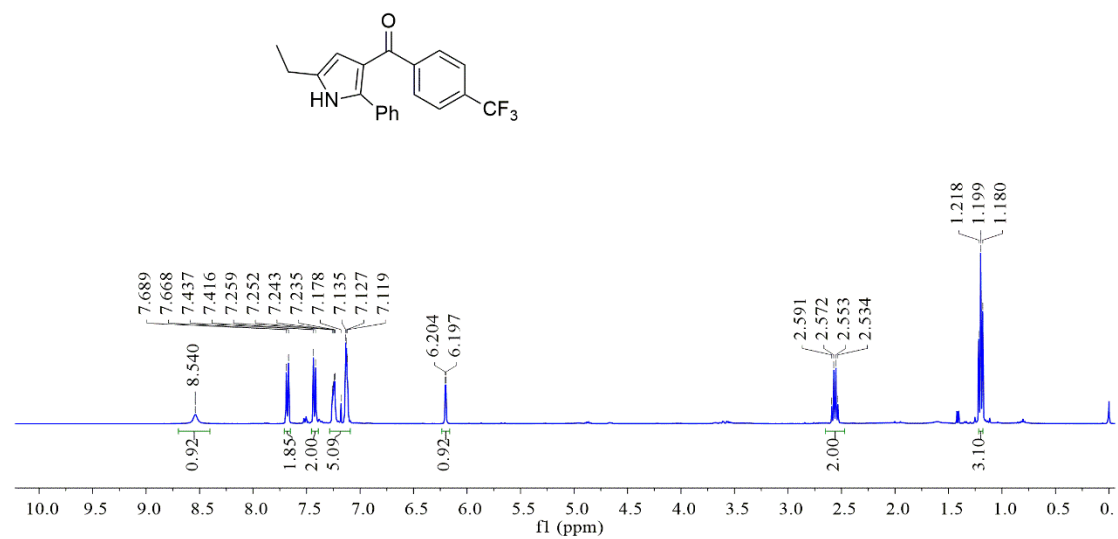

### <sup>13</sup>C-NMR spectrum of 3ch

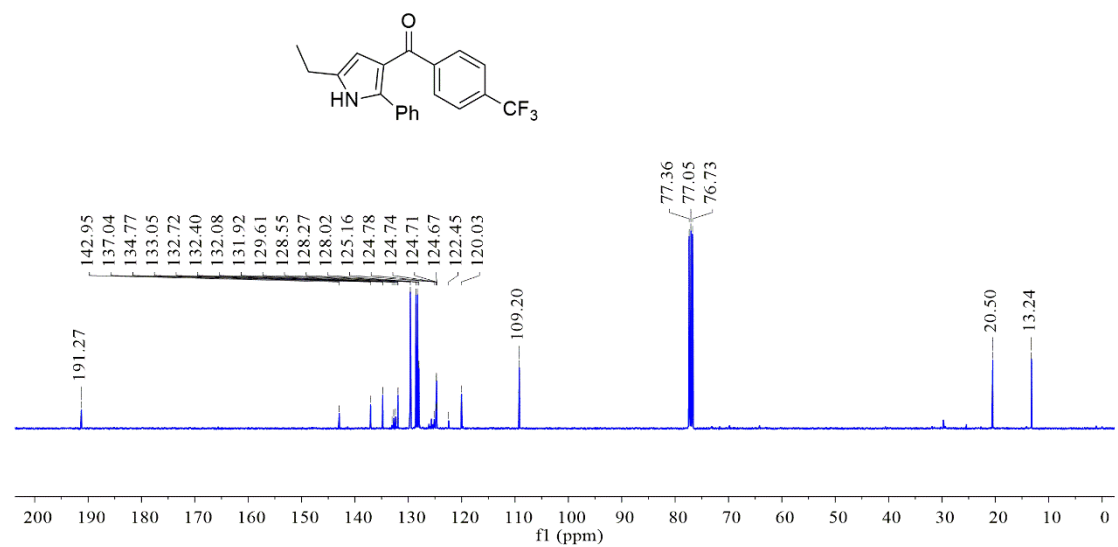

### <sup>1</sup>H-NMR spectrum of 3cj

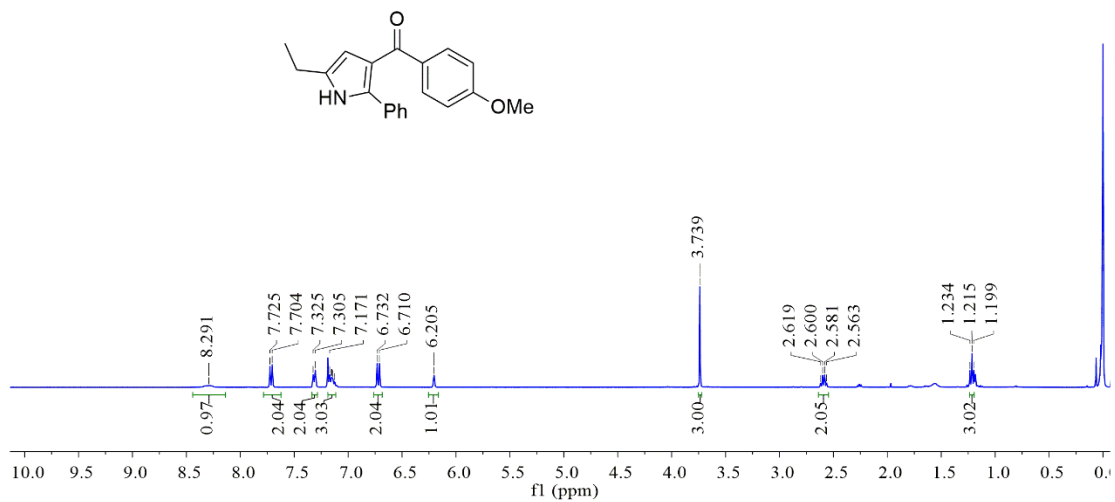

### <sup>13</sup>C-NMR spectrum of 3cj

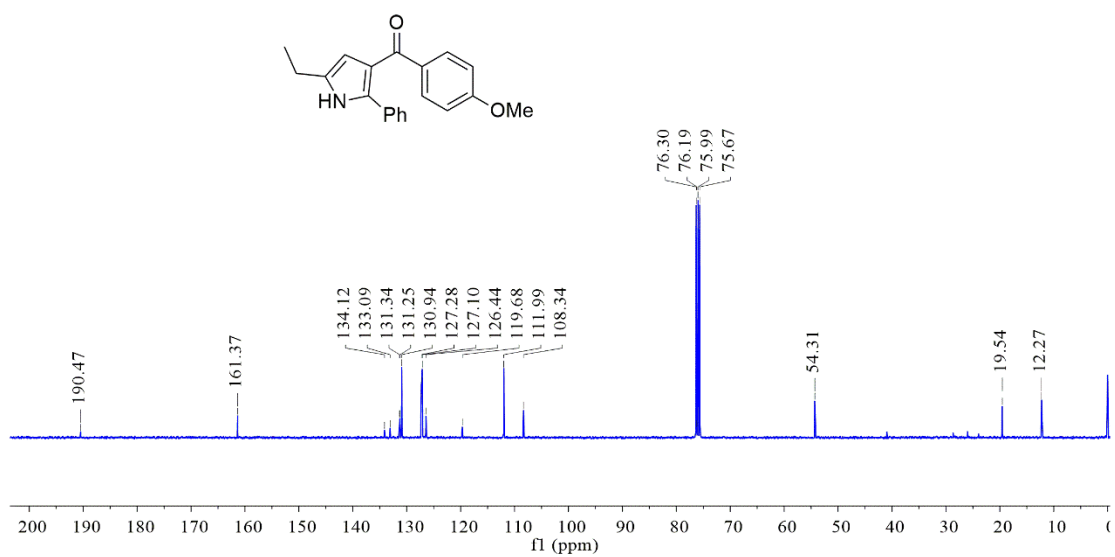

### <sup>1</sup>H-NMR spectrum of 3da

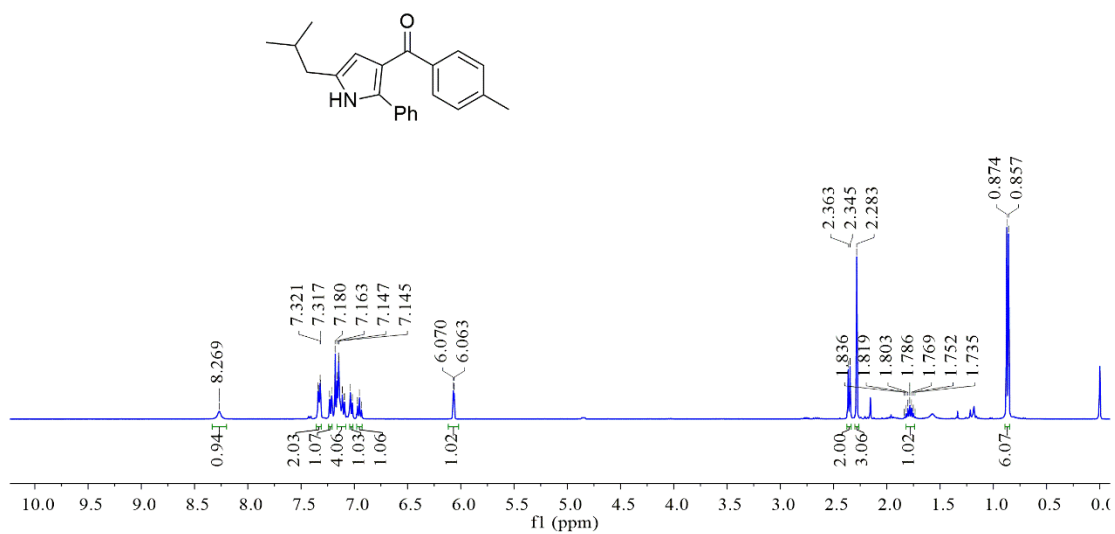

### <sup>13</sup>C-NMR spectrum of 3da

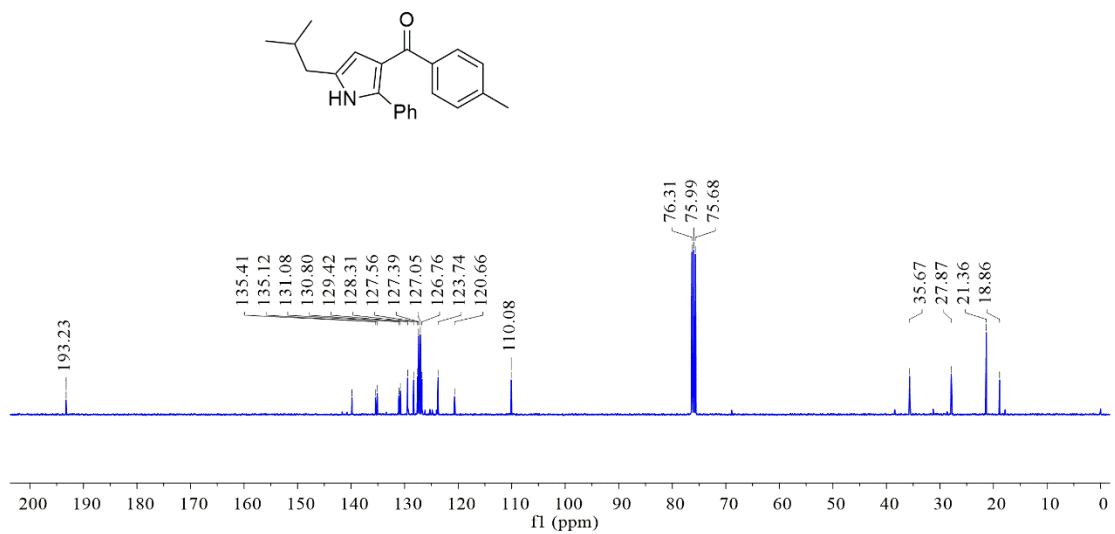

### <sup>1</sup>H-NMR spectrum of 3de

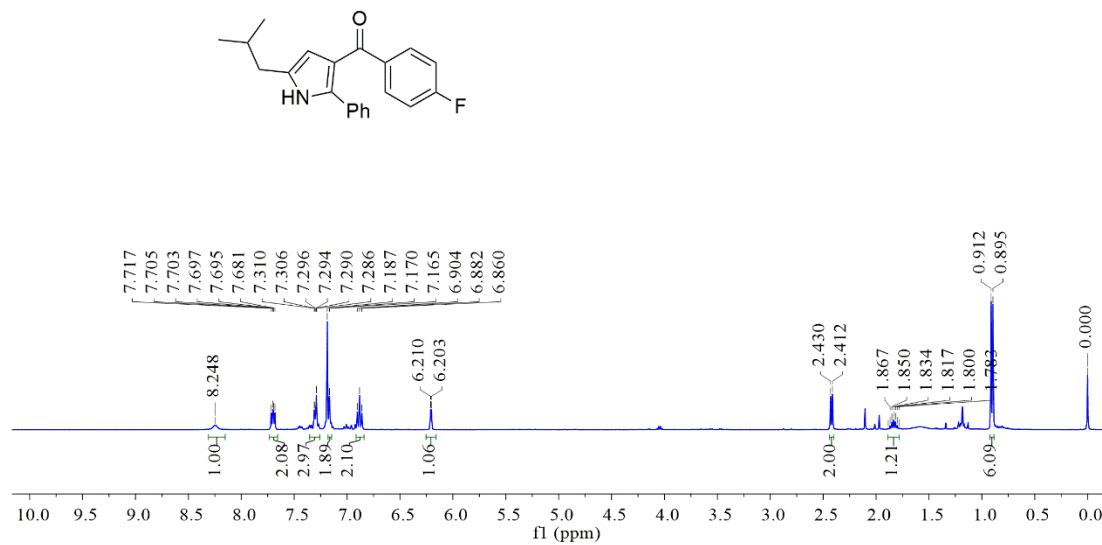

### <sup>13</sup>C-NMR spectrum of 3de

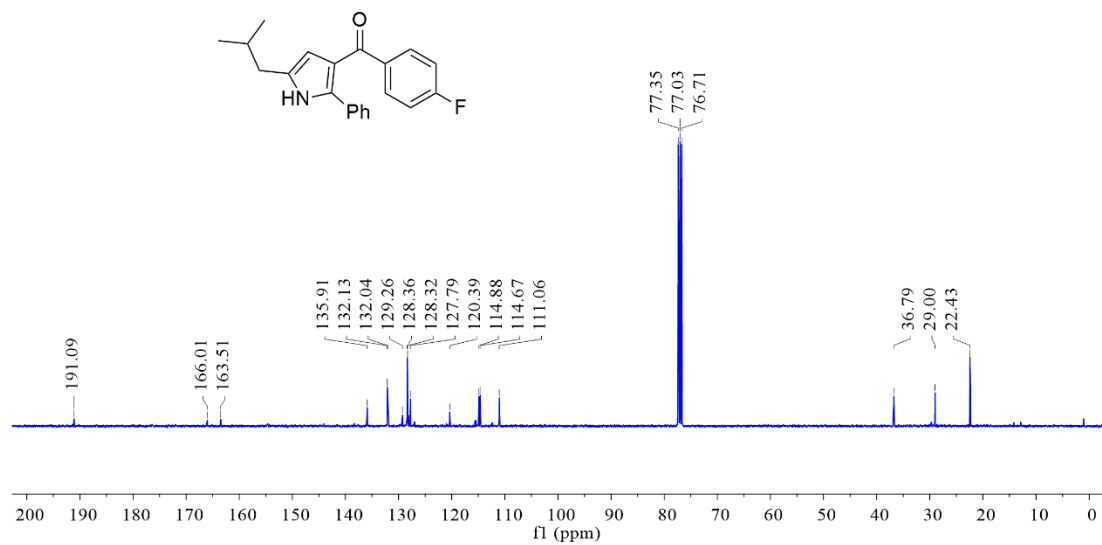

### <sup>1</sup>H-NMR spectrum of 3dj

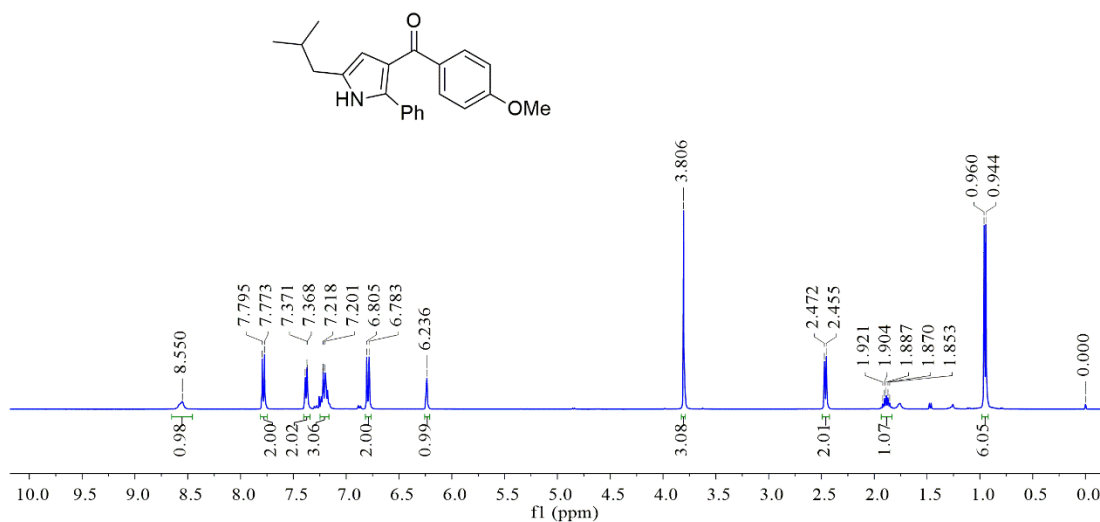

### <sup>13</sup>C-NMR spectrum of 3dj

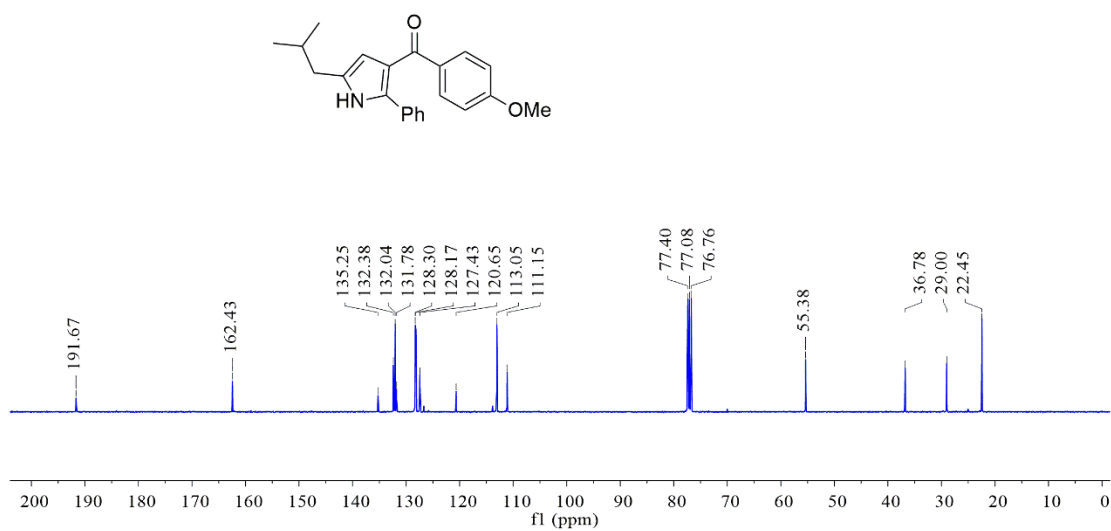

### <sup>1</sup>H-NMR spectrum of 3ea

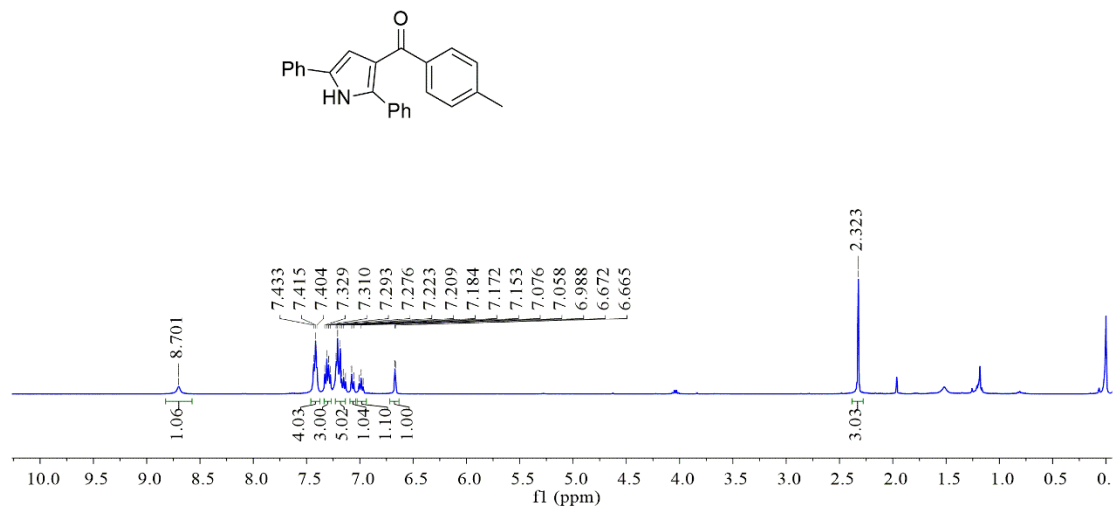

### <sup>13</sup>C-NMR spectrum of 3ea

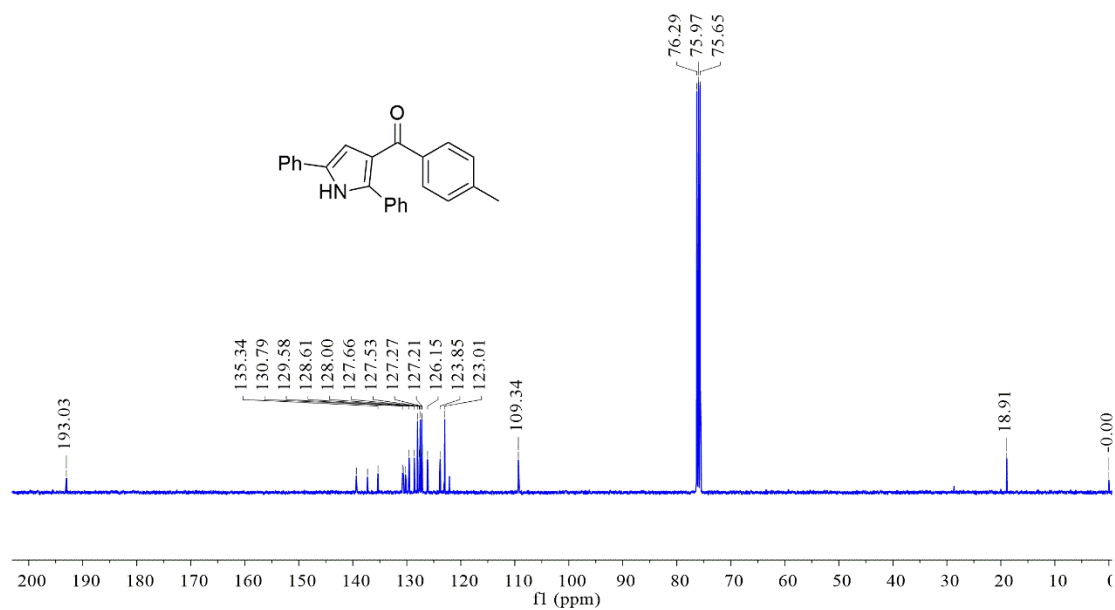

### <sup>1</sup>H-NMR spectrum of 3ed

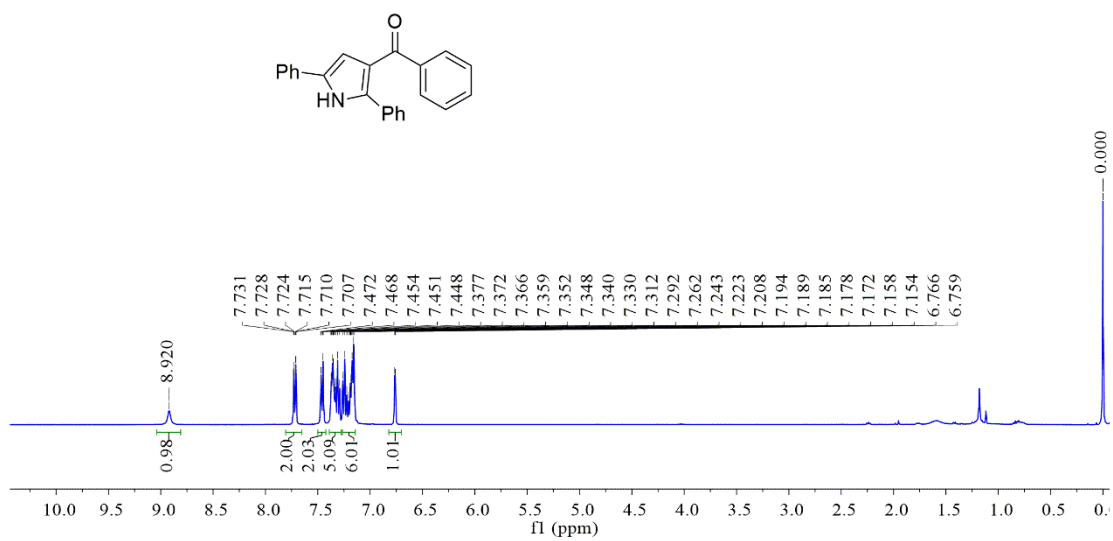

### <sup>13</sup>C-NMR spectrum of 3ed

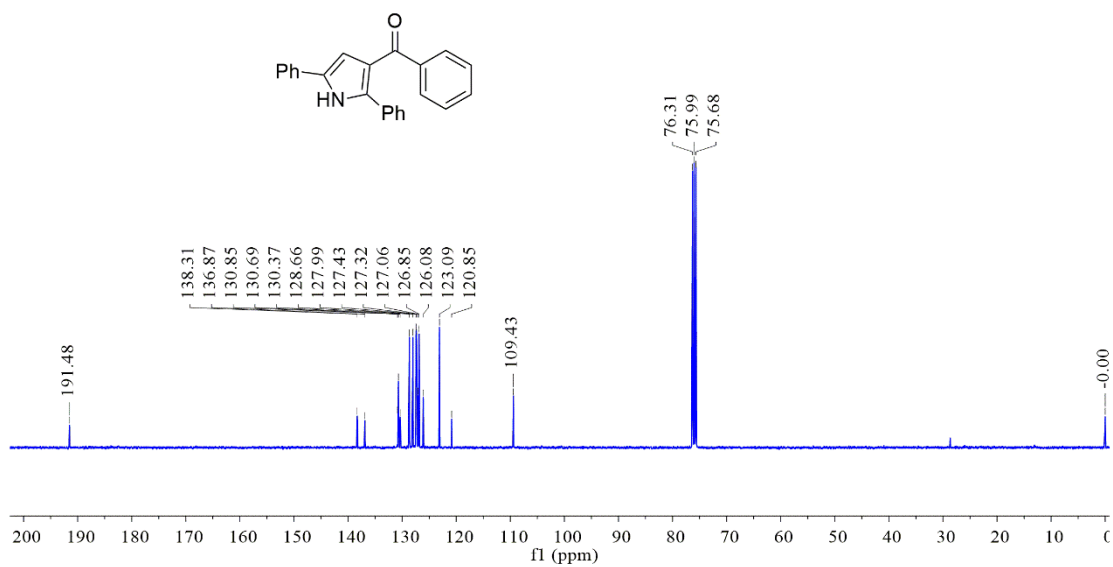



### <sup>1</sup>H-NMR spectrum of 3ej

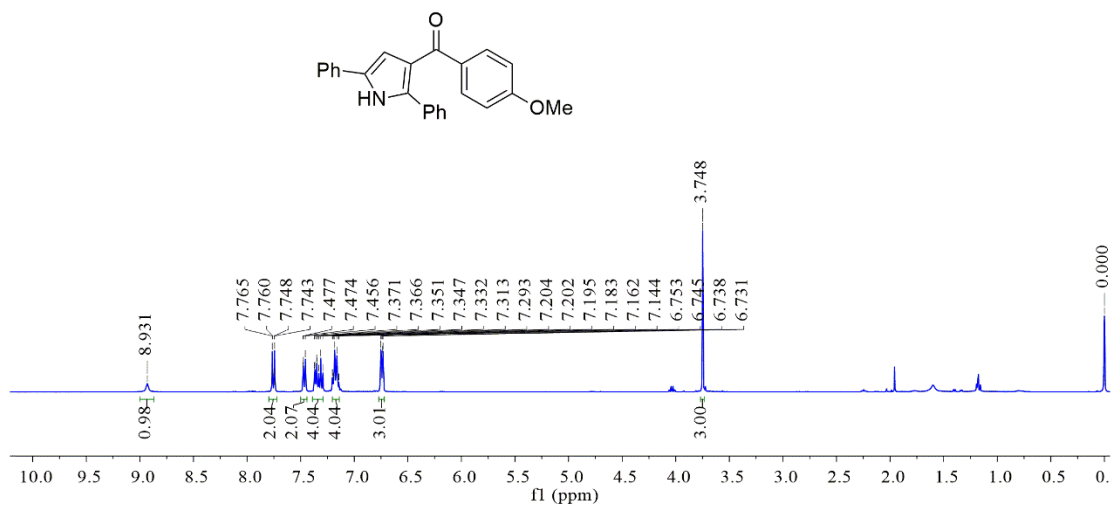

### <sup>13</sup>C-NMR spectrum of 3ej

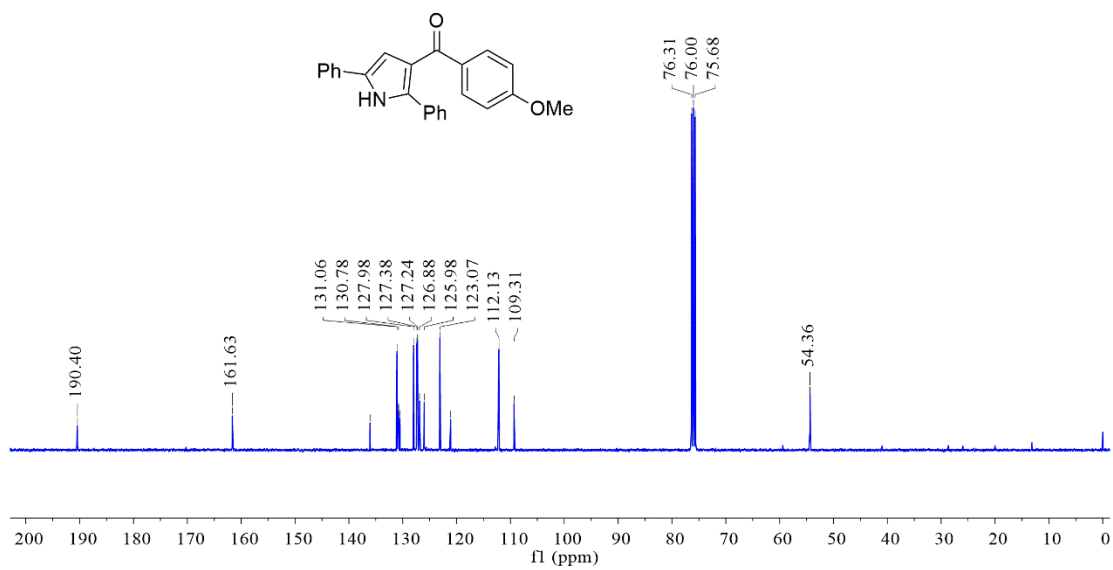

### <sup>1</sup>H-NMR spectrum of 3fa

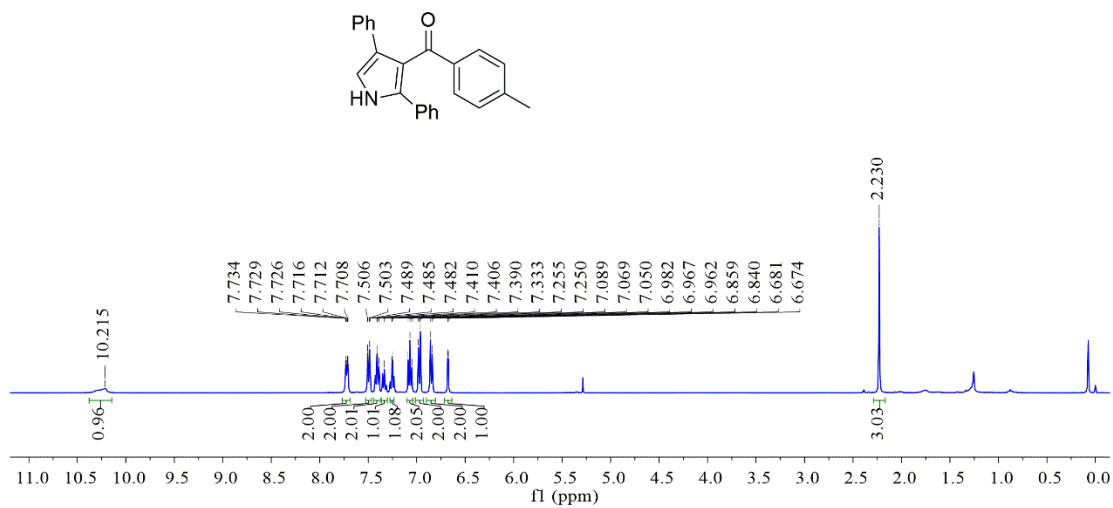

### <sup>13</sup>C-NMR spectrum of 3fa

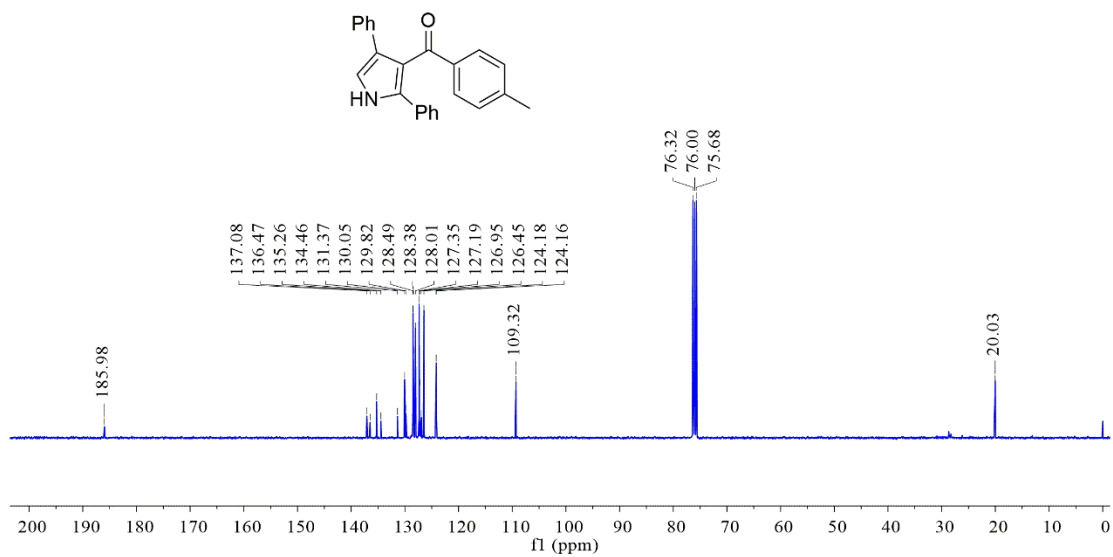

### <sup>1</sup>H-NMR spectrum of 3fw

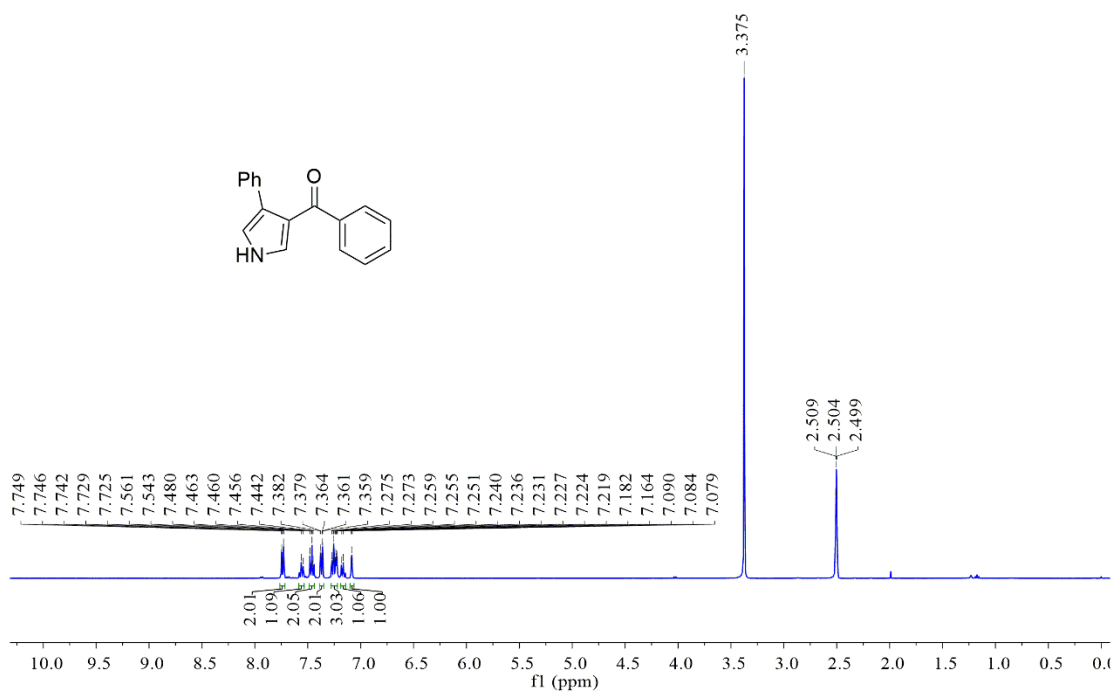

### <sup>13</sup>C-NMR spectrum of 3fw

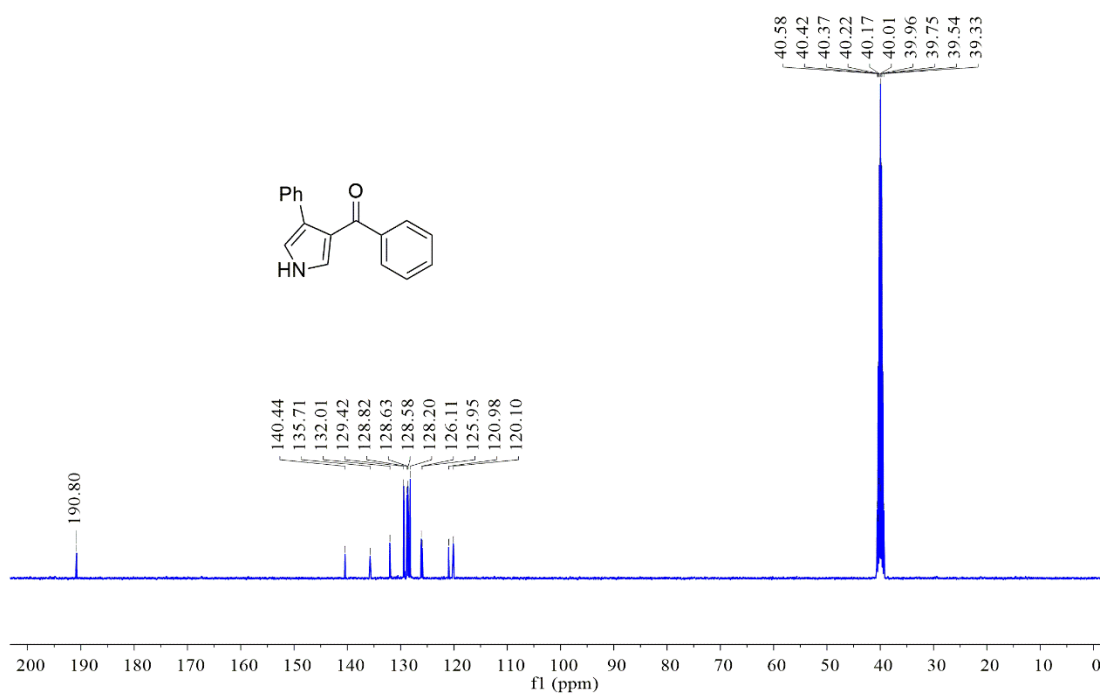

### <sup>1</sup>H-NMR spectrum of 3ga

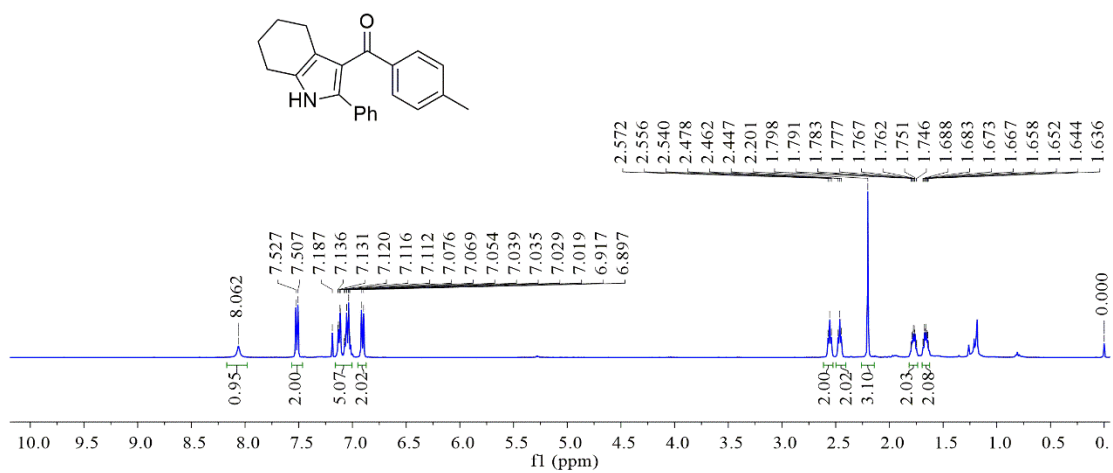

### <sup>13</sup>C-NMR spectrum of 3ga

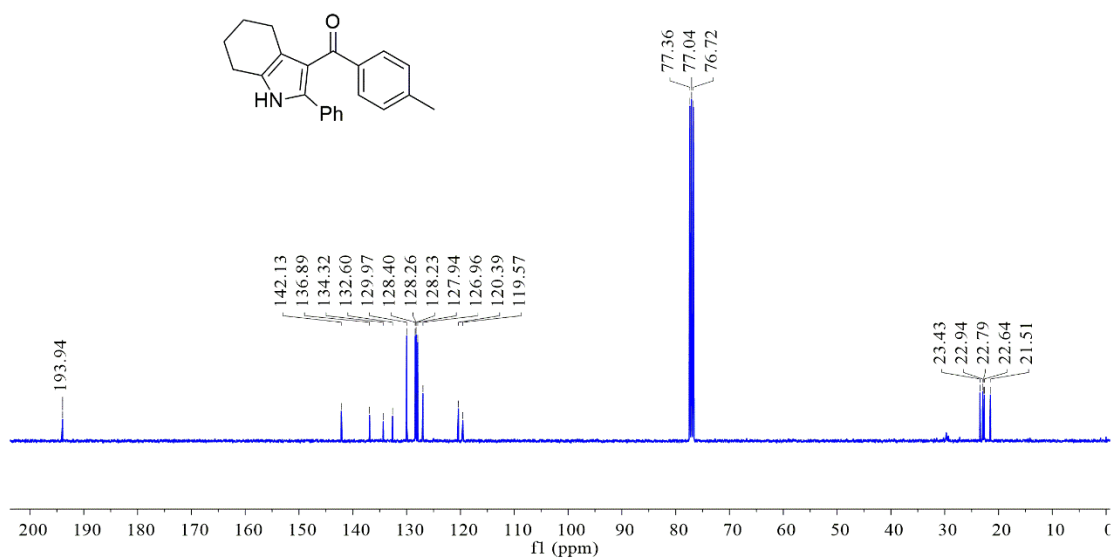

### <sup>1</sup>H-NMR spectrum of 3aaa

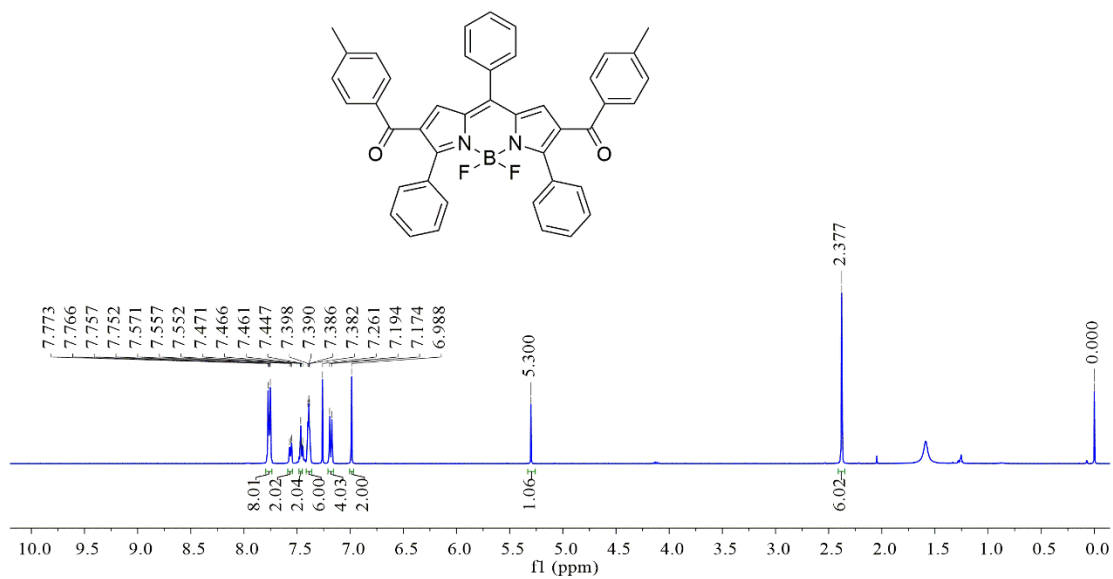

### <sup>13</sup>C-NMR spectrum of 3aaa

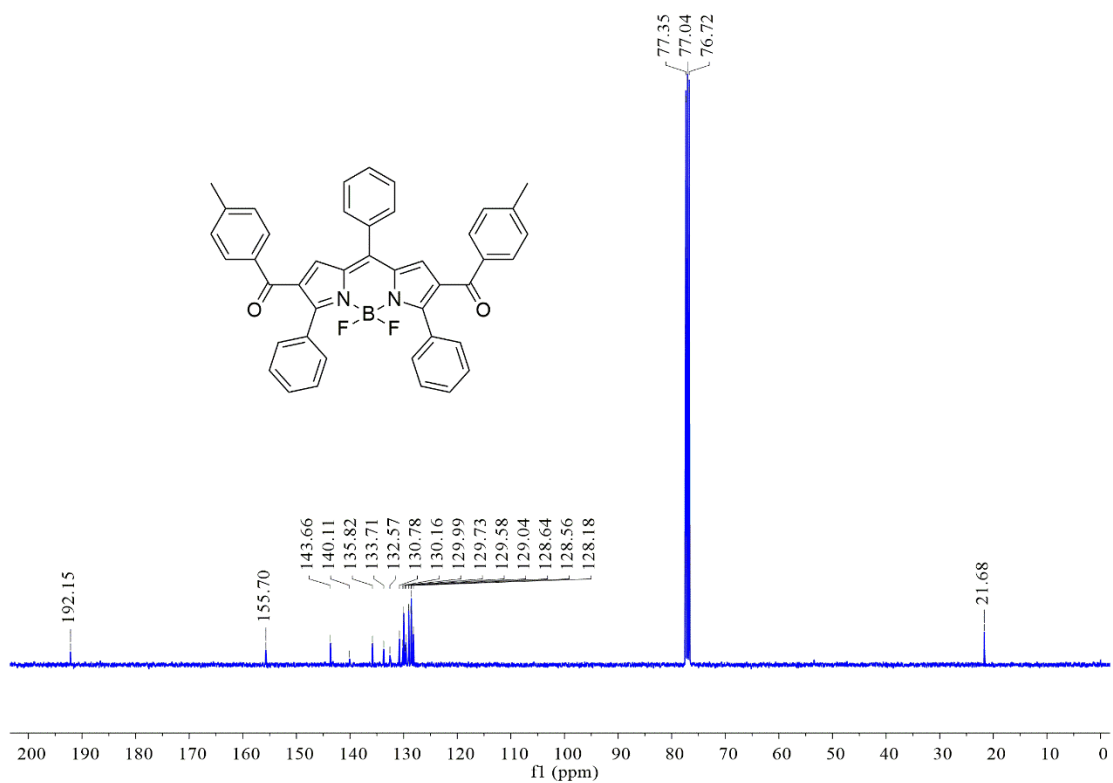

### <sup>1</sup>H-NMR spectrum of 4aa

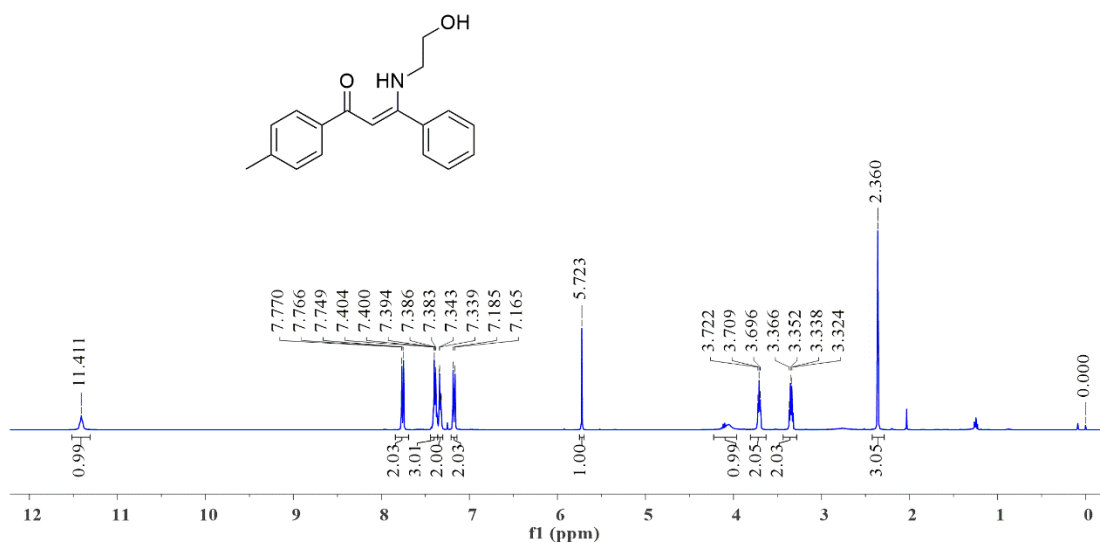

### <sup>13</sup>C-NMR spectrum of 4aa

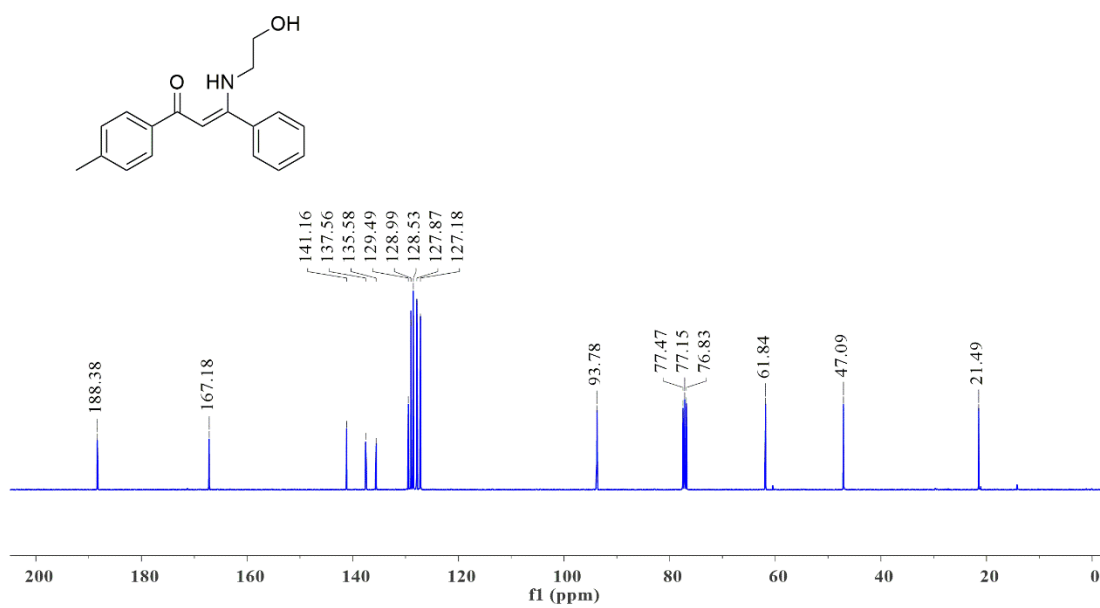

### <sup>1</sup>H-NMR spectrum of 9da

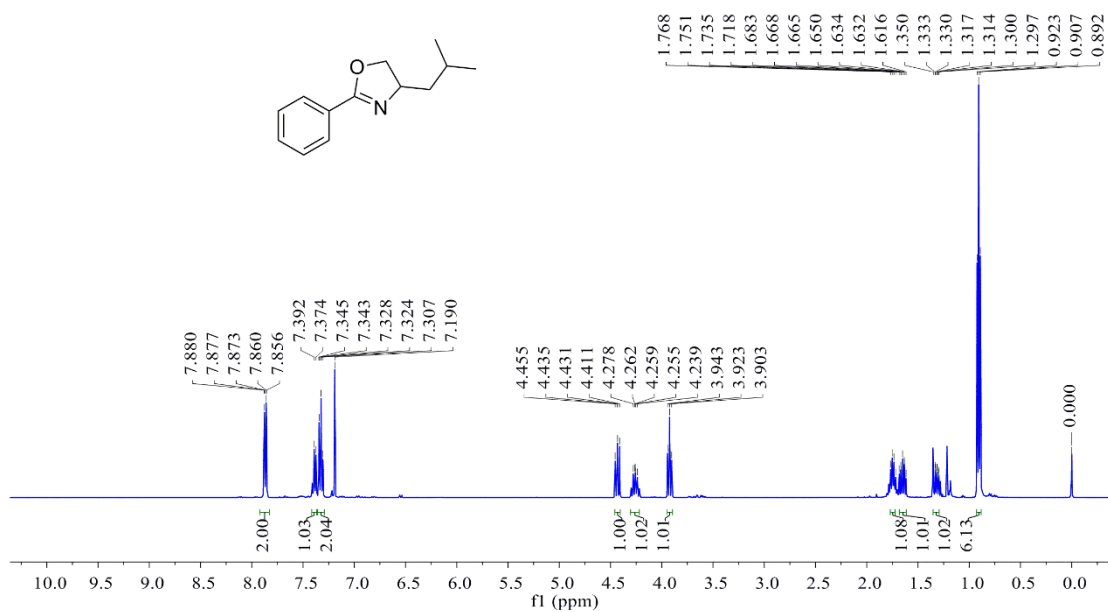

### <sup>13</sup>C-NMR spectrum of 9da

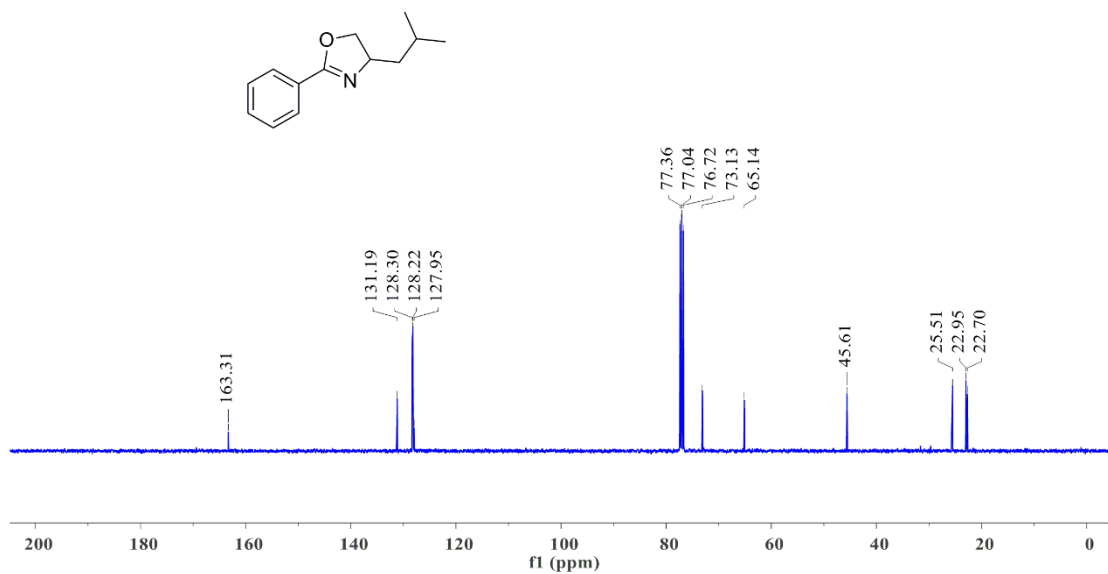

Supplement: d1cc07018e1.pdf [file d1cc07018e1.pdf]
